# Supplementary material
Source: PubMed Central journal article supplement (PMC7596769)

## Supporting Information for

### **Acylphloroglucinols with acetylcholinesterase inhibitory effects from the fruits of *Eucalyptus robusta***

Hui Liu<sup>a,b,1</sup>, Xiao-Zhi He<sup>a,1</sup>, Mi-Yan Feng<sup>a,1</sup>, Yuan-Zeng<sup>a</sup>, Tyler J. Rauwolf<sup>c</sup>, Li-Dong Shao<sup>d</sup>, Wei Ni<sup>a</sup>, Hui Yan<sup>a</sup>, John A. Porco, Jr.<sup>c</sup>, Xiao-Jiang Hao<sup>a,b</sup>, Xu-Jie Qin<sup>a,b,\*</sup>, Hai-Yang Liu<sup>a,b,\*</sup>

<sup>a</sup> *State Key Laboratory of Phytochemistry and Plant Resources in West China, Kunming Institute of Botany, Chinese Academy of Sciences, Kunming 650201, People's Republic of China*

<sup>b</sup> *University of Chinese Academy of Sciences, Beijing 100049, People's Republic of China*

<sup>c</sup> *Department of Chemistry, Center for Molecular Discovery (BU-CMD), Boston University 590 Commonwealth Avenue, Boston, MA 02215, United States*

<sup>d</sup> *Department of Traditional Chinese Medicine, Yunnan University of Chinese Medicine, Kunming 650500, People's Republic of China*

---

\* Corresponding authors.

*E-mail addresses:* qinxujie@mail.kib.ac.cn (X.-J. Qin), haiyangliu@mail.kib.ac.cn (H.-Y. Liu).

<sup>1</sup> These authors contributed equally to this work.

## TABLE OF CONTENTS

| Content                                                                                          | Pages   |
|--------------------------------------------------------------------------------------------------|---------|
| <b>Figure S1</b> Key ROESY correlations of <b>1–4</b>                                            | S1      |
| <b>Figure S2</b> Chiral analysis of <b>6, 8</b> , and a mixture of <b>10</b> and <b>11</b>       | S1      |
| <b>Figures S3–S8</b> NMR spectra of <b>1</b> in CDCl <sub>3</sub>                                | S2–S2   |
| <b>Figure S9</b> HRESIMS spectrum of <b>1</b>                                                    | S2      |
| <b>Figures S10–S15</b> NMR spectra of <b>2</b> in CDCl <sub>3</sub>                              | S2–S9   |
| <b>Figure S16</b> HRESIMS spectrum of <b>2</b>                                                   | S9      |
| <b>Figures S17–S22</b> NMR spectra of <b>3</b> in CDCl <sub>3</sub>                              | S10–S13 |
| <b>Figure S23</b> HRESIMS spectrum of <b>3</b>                                                   | S13     |
| <b>Figures S24–S29</b> NMR spectra of <b>4</b> in CDCl <sub>3</sub>                              | S14–S17 |
| <b>Figure S30</b> HRESIMS spectrum of <b>4</b>                                                   | S17     |
| <b>Figures S31–S36</b> NMR spectra of <b>5</b> in CDCl <sub>3</sub>                              | S18–S21 |
| <b>Figure S37</b> HRESIMS spectrum of <b>5</b>                                                   | S21     |
| <b>Figures S38–S42</b> NMR spectra of <b>6</b> in methanol- <i>d</i> <sub>4</sub>                | S22–S24 |
| <b>Figure S43</b> HRESIMS spectrum of <b>6</b>                                                   | S24     |
| <b>Figures S44–S48</b> NMR spectra of <b>7</b> in CDCl <sub>3</sub>                              | S25–S27 |
| <b>Figure S49</b> HRESIMS spectrum of <b>7</b>                                                   | S27     |
| <b>Figures S50–S54</b> NMR spectra of <b>8</b> in acetone- <i>d</i> <sub>6</sub>                 | S28–S30 |
| <b>Figure S55</b> HRESIMS spectrum of <b>8</b>                                                   | S30     |
| <b>Figures S56–S60</b> NMR spectra of <b>9</b> in CDCl <sub>3</sub>                              | S31–S33 |
| <b>Figure S61</b> HRESIMS spectrum of <b>9</b>                                                   | S34     |
| <b>Figures S62–S66</b> NMR spectra of <b>10</b> and <b>11</b> in pyridine- <i>d</i> <sub>5</sub> | S34–S36 |
| <b>Figure S67</b> HRESIMS spectrum of <b>10</b> and <b>11</b>                                    | S37     |
| ECD computational data of <b>2–6</b> and <b>8</b>                                                | S38–S42 |

**Figure S1** Key ROESY correlations of **1–4**.

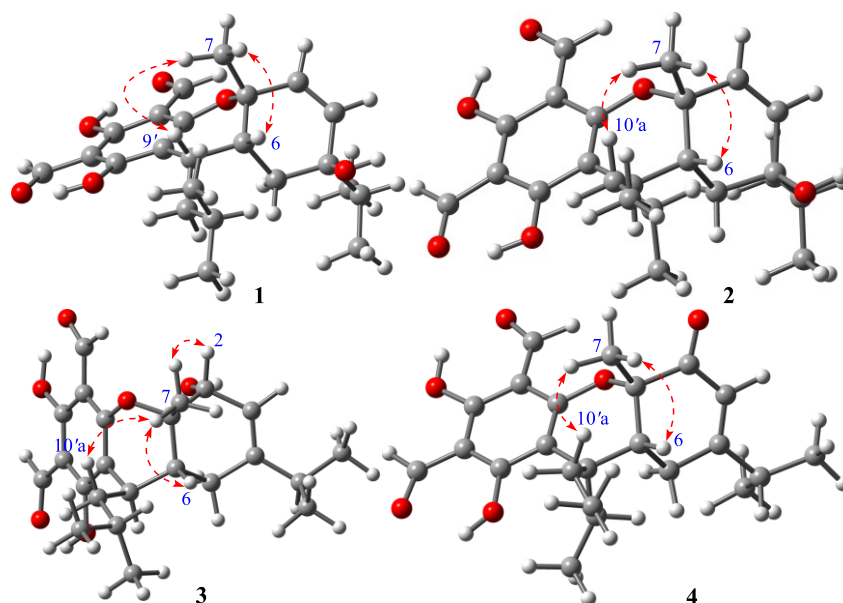

**Figure S2** Chiral analysis of **6**, **8**, and a mixture of **10** and **11** by a CHIRALPAK IC column

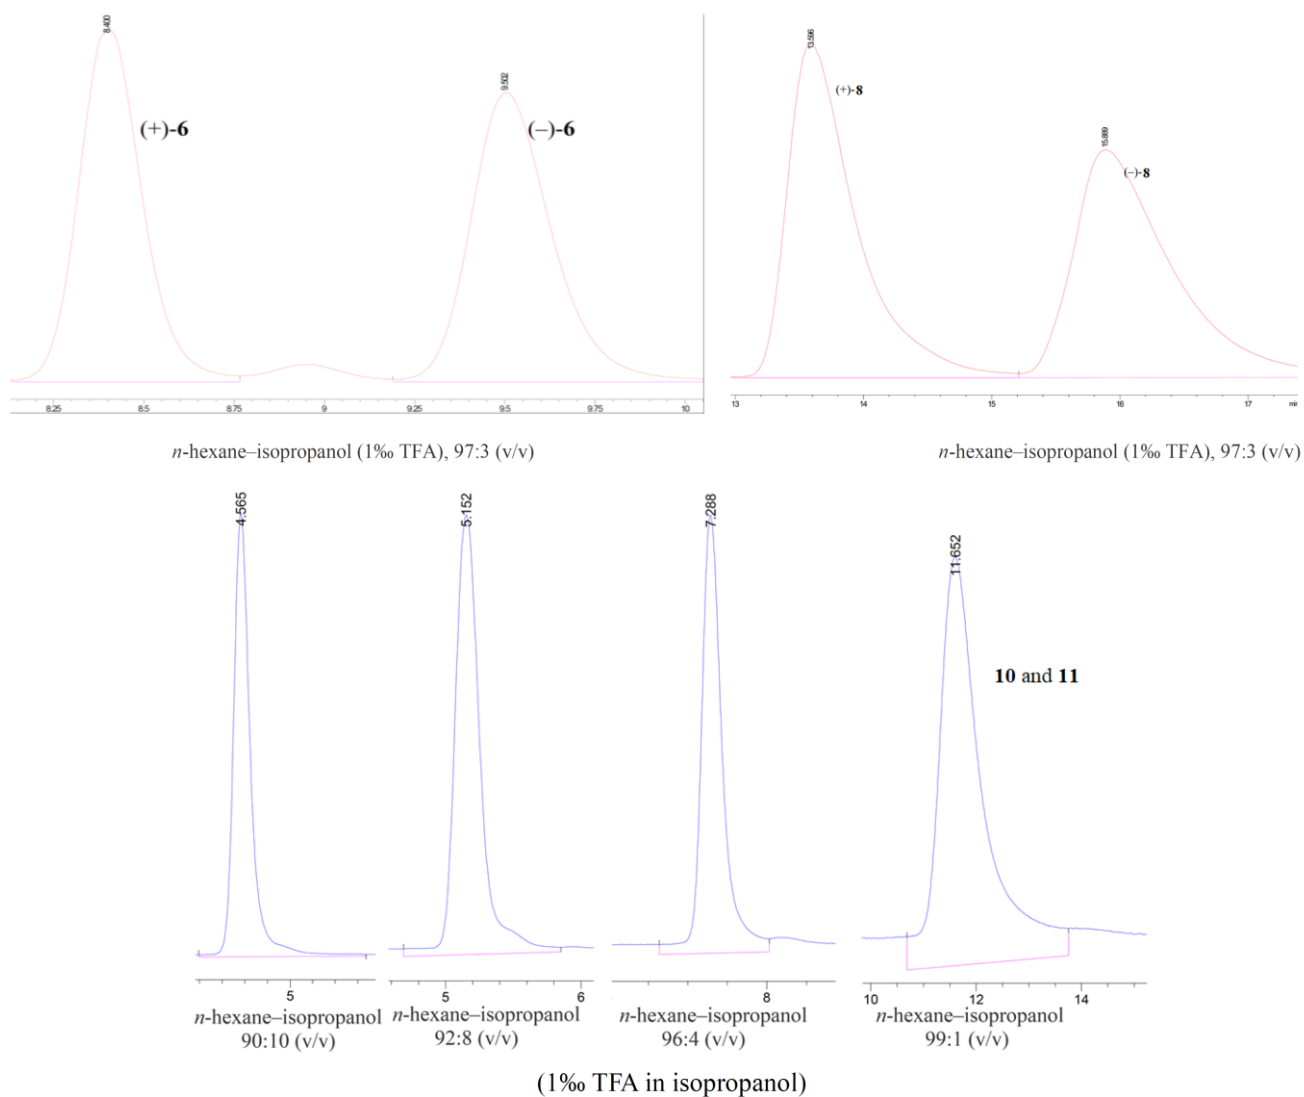

**Figure S3**  $^1\text{H}$  NMR spectrum of **1** (500 MHz,  $\text{CDCl}_3$ )

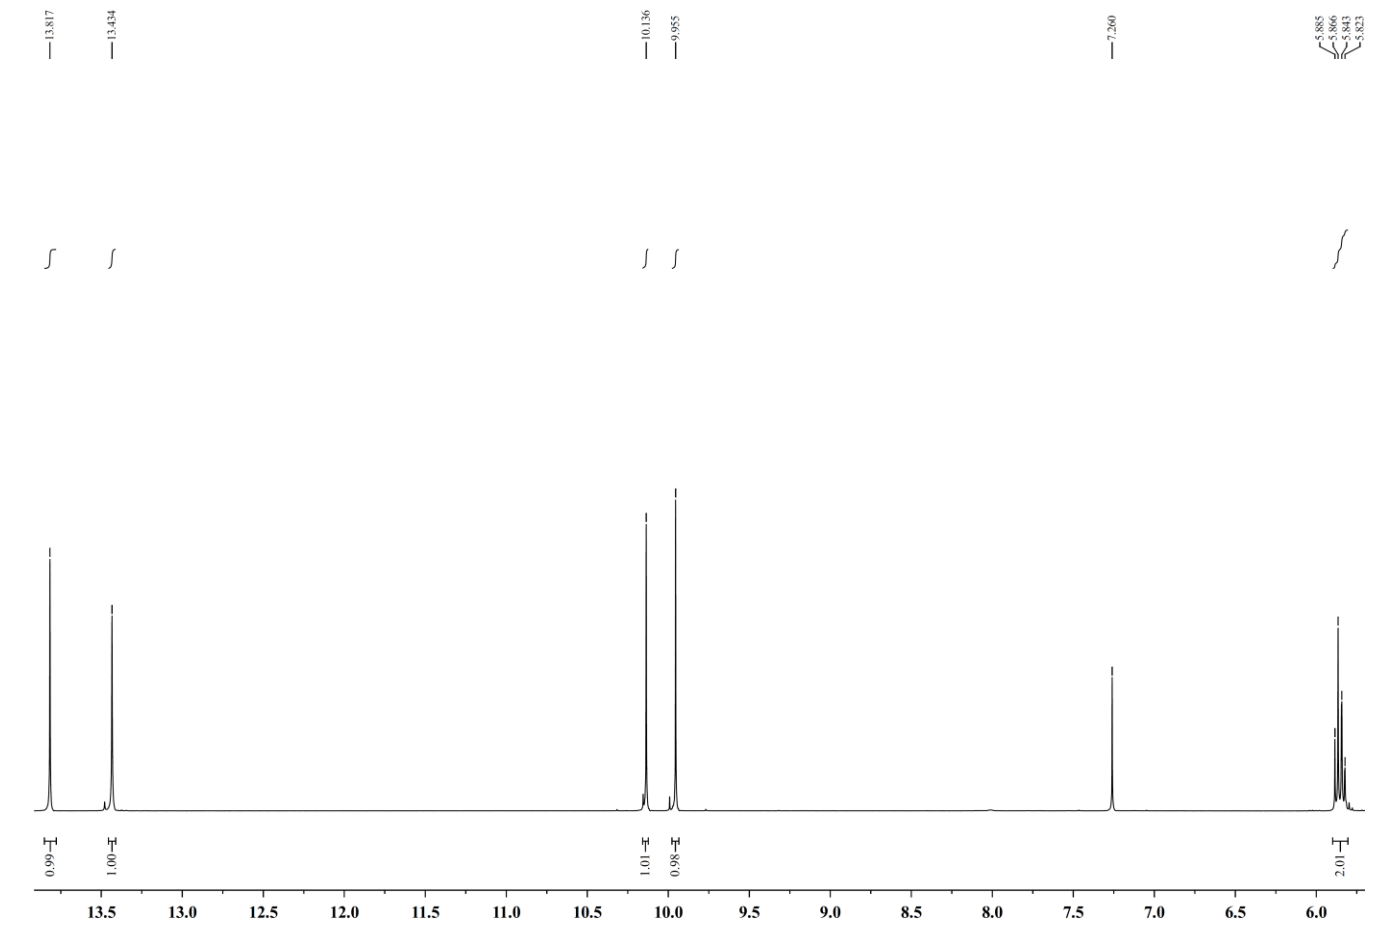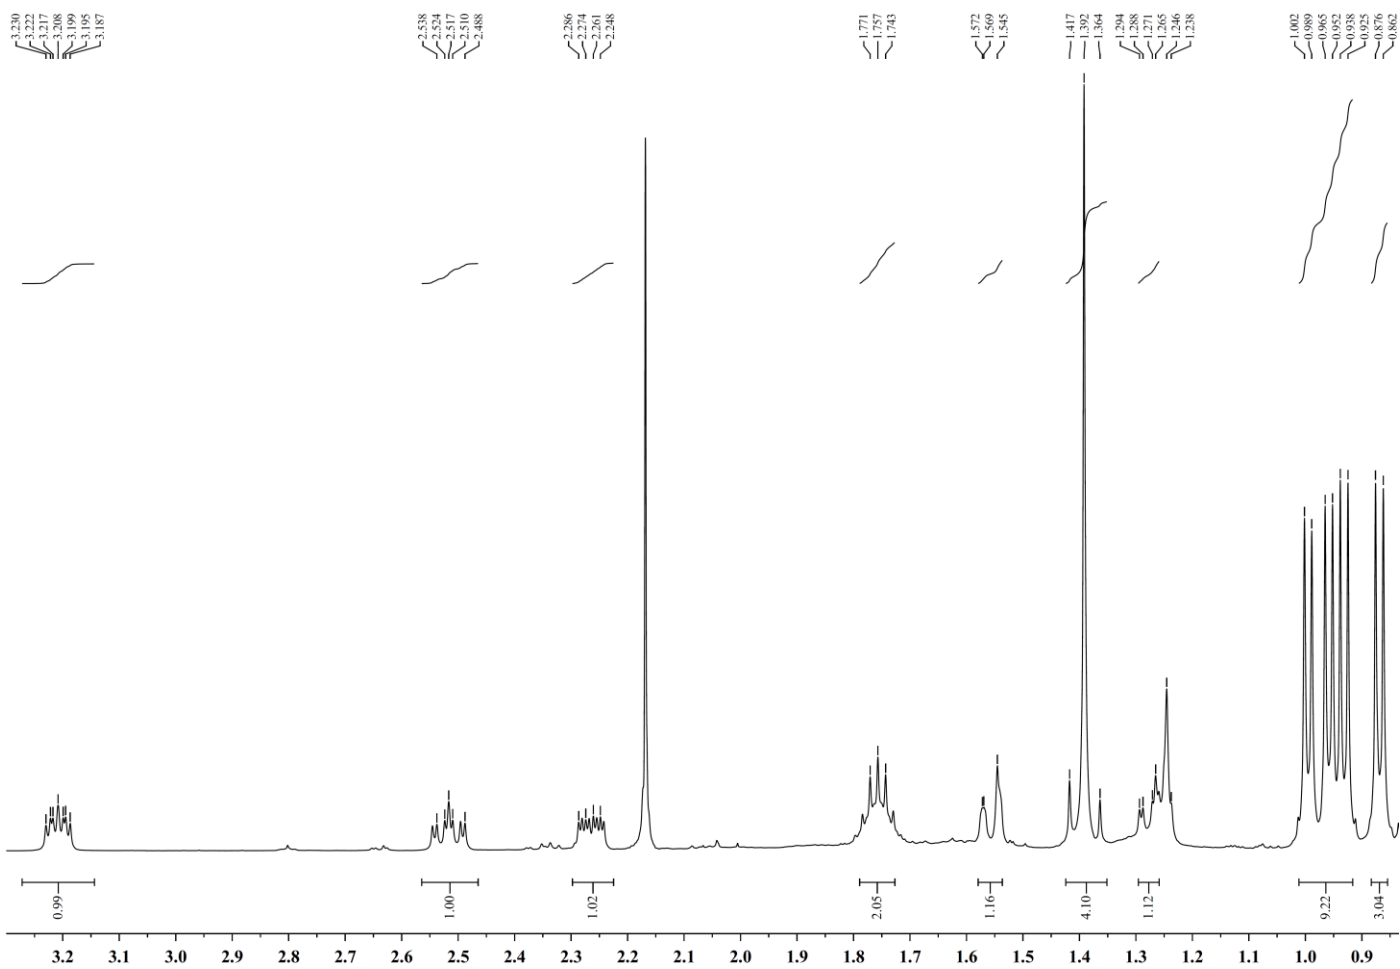

Figure S4  $^{13}\text{C}$  NMR spectrum of **1** (125 MHz,  $\text{CDCl}_3$ )

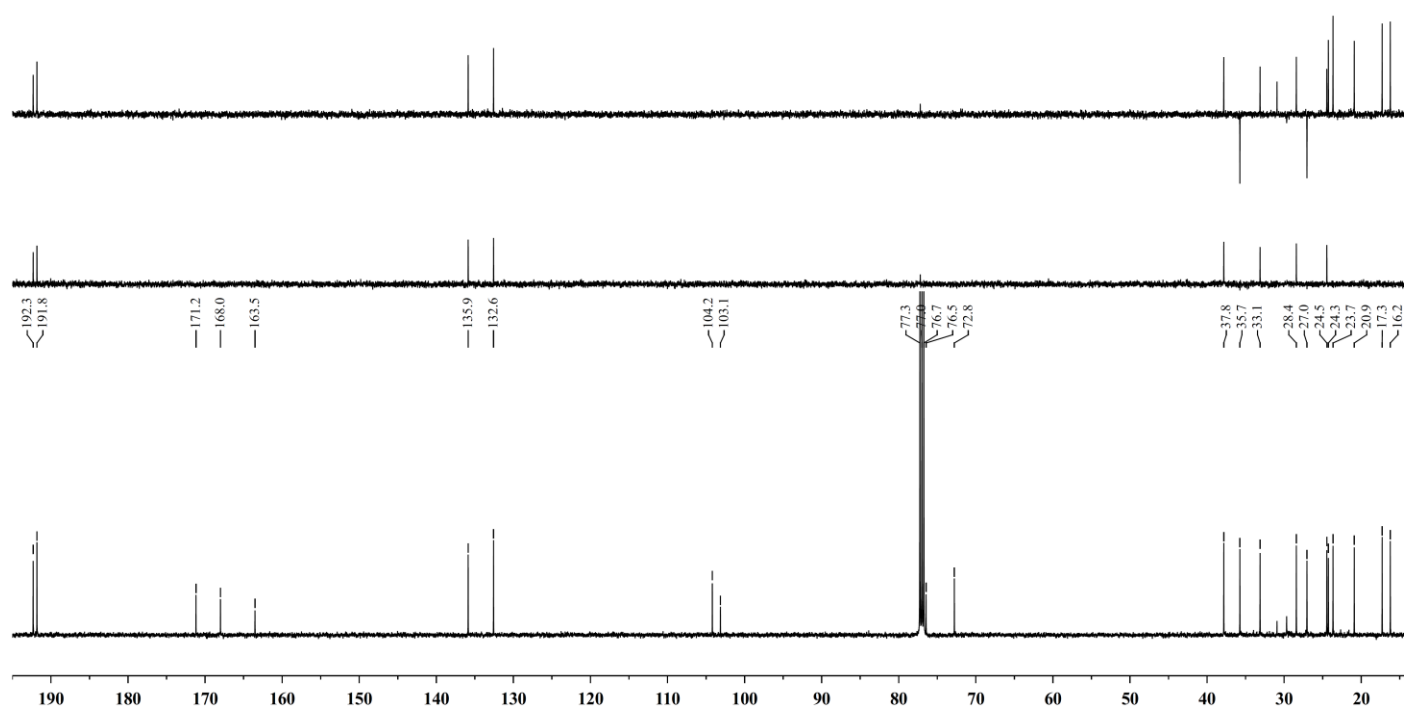

Figure S5 HSQC spectrum of **1**

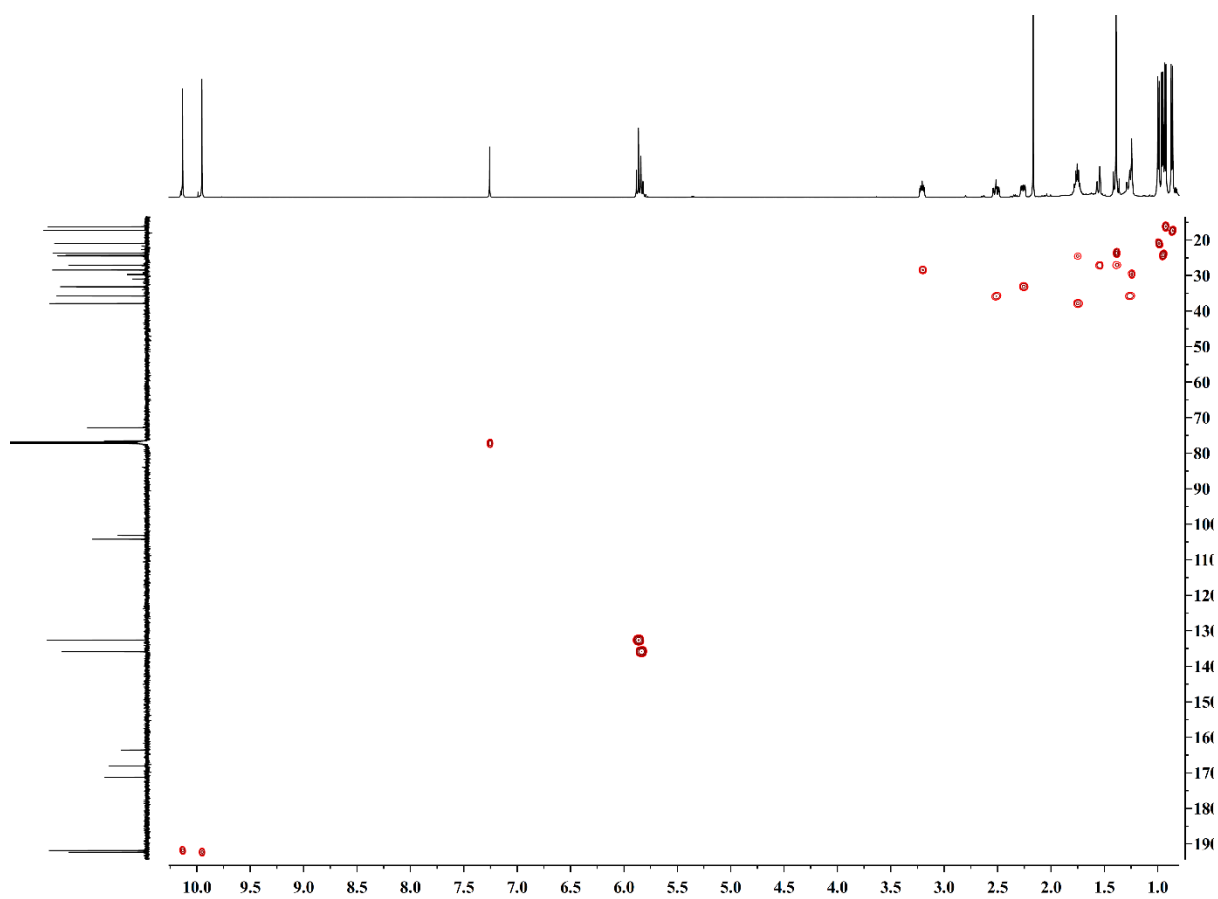

Figure S6 HMBC spectrum of **1**

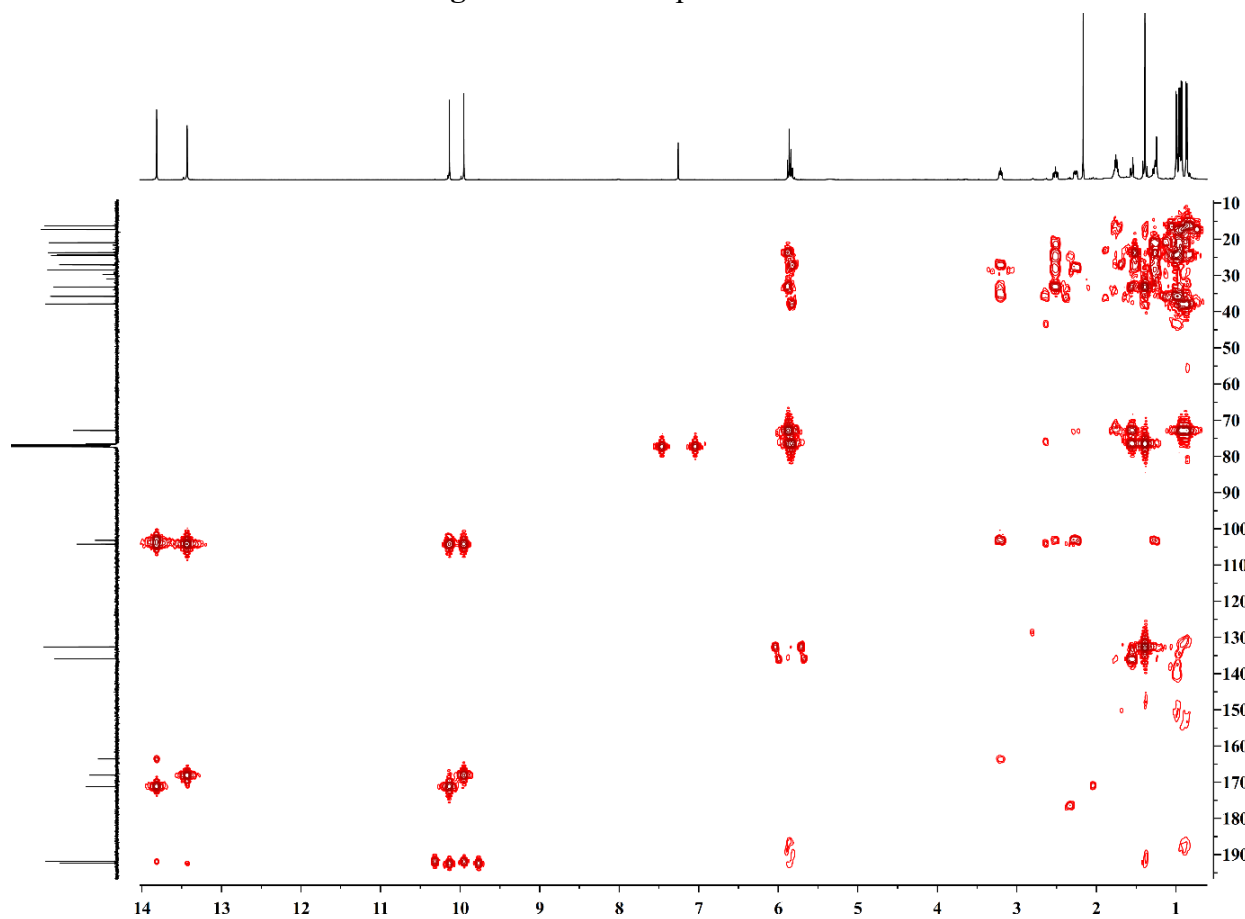

Figure S7  $^1\text{H}$ - $^1\text{H}$  COSY spectrum of **1**

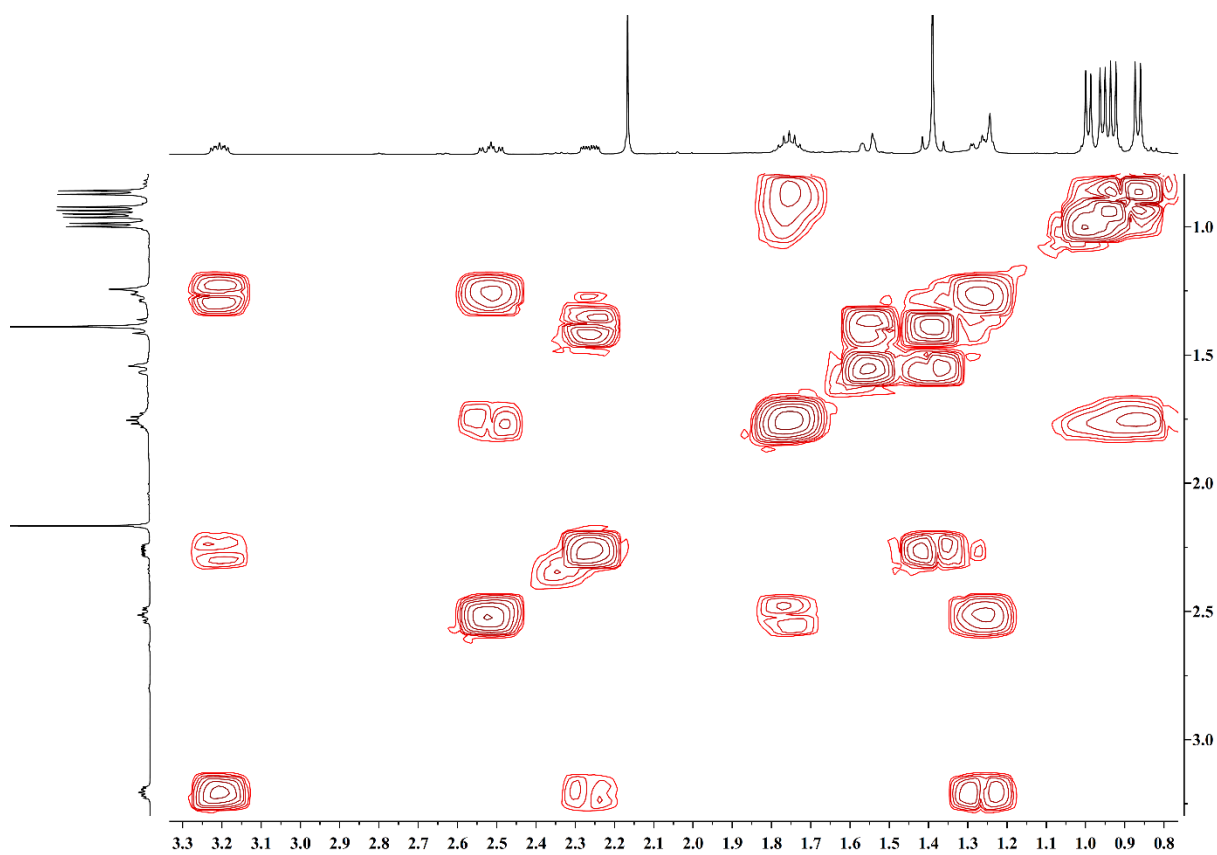

Figure S8 ROESY spectrum of 1

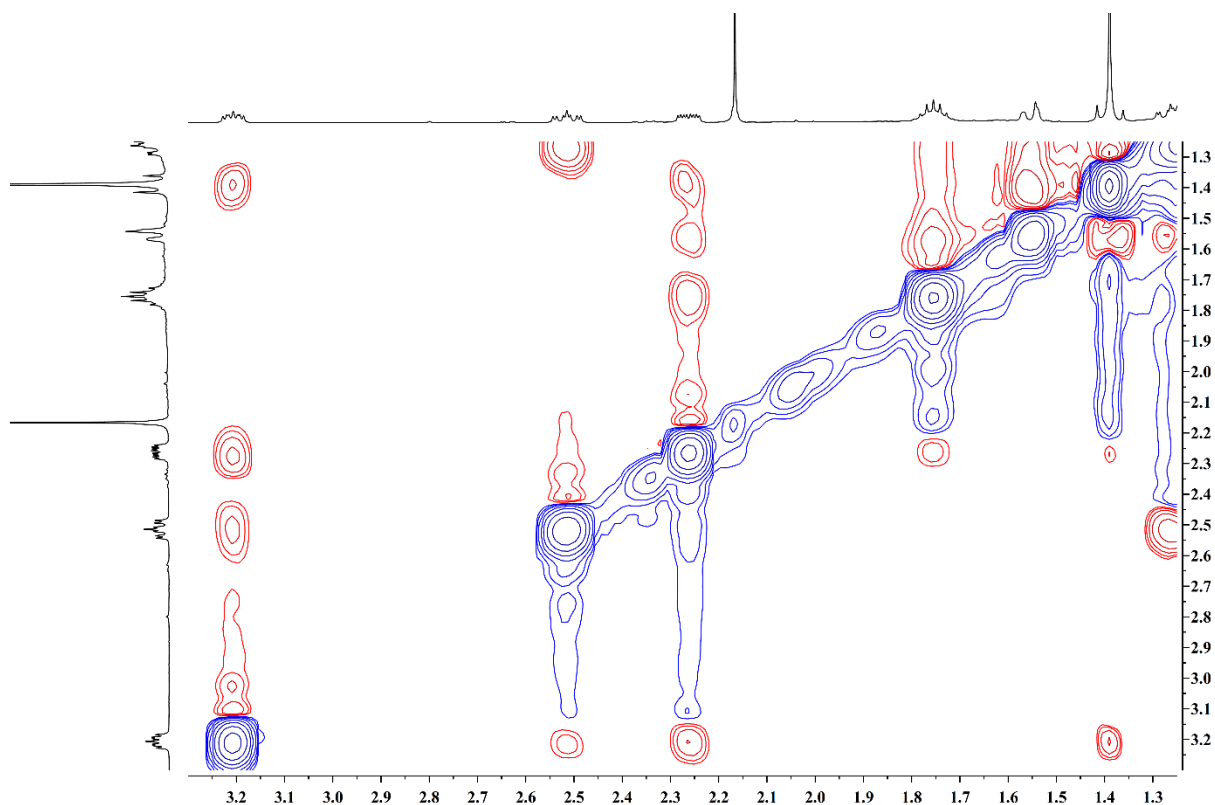

Figure S9 HRESIMS spectrum of 1

User Spectra

Fragmentor Voltage 135 Collision Energy 0 Ionization Mode ESI

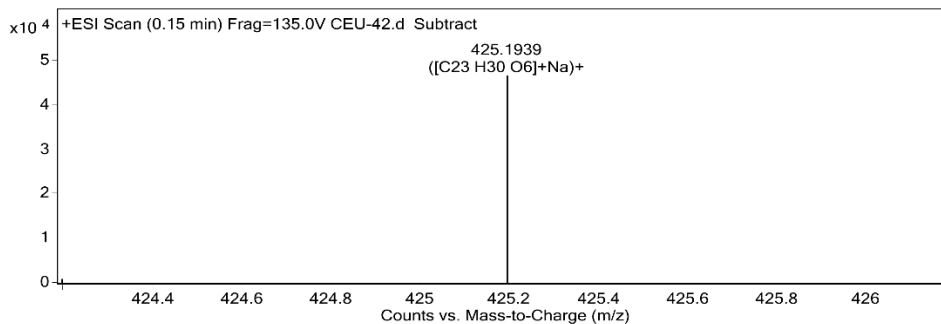

Peak List

| m/z      | z | Abund    | Formula    | Ion     |
|----------|---|----------|------------|---------|
| 274.2735 | 1 | 18487.52 |            |         |
| 318.3002 | 1 | 26547.79 |            |         |
| 425.1939 | 1 | 46856.73 | C23 H30 O6 | (M+Na)+ |
| 426.1973 | 1 | 12582.23 | C23 H30 O6 | (M+Na)+ |
| 441.1679 | 1 | 13739.56 |            |         |
| 453.1691 | 1 | 40827.04 |            |         |
| 623.2886 | 2 | 20494.45 |            |         |
| 623.7908 | 2 | 16000.04 |            |         |

Formula Calculator Element Limits

| Element | Min | Max |
|---------|-----|-----|
| C       | 3   | 60  |
| H       | 0   | 120 |
| O       | 0   | 30  |

Formula Calculator Results

| Formula    | CalculatedMass | CalculatedMz | Mz       | Diff. (mDa) | Diff. (ppm) | DBE    |
|------------|----------------|--------------|----------|-------------|-------------|--------|
| C23 H30 O6 | 402.2042       | 425.1935     | 425.1939 | -0.40       | -0.94       | 9.0000 |

Figure S10  $^1\text{H}$  NMR spectrum of **2** (500 MHz,  $\text{CDCl}_3$ )

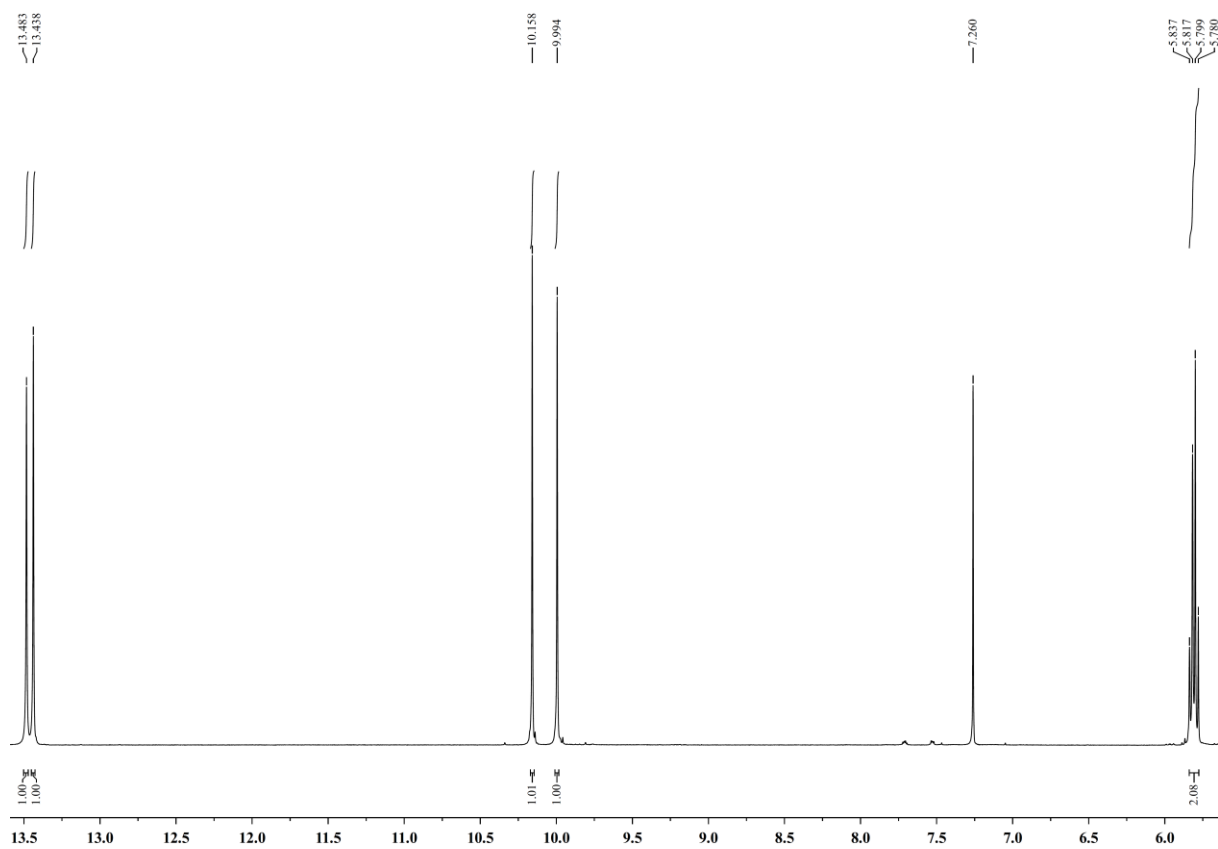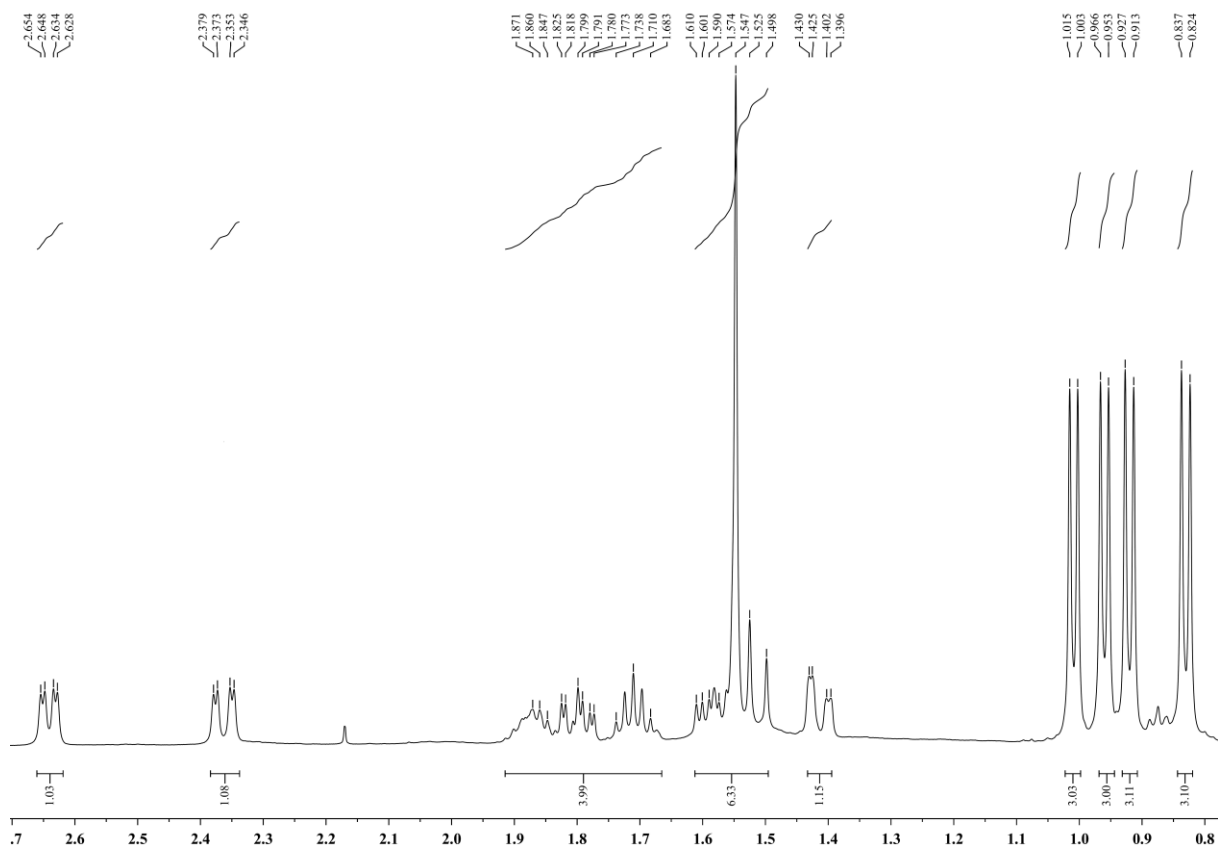



Figure S11  $^{13}\text{C}$  NMR spectrum of **2** (125 MHz,  $\text{CDCl}_3$ )

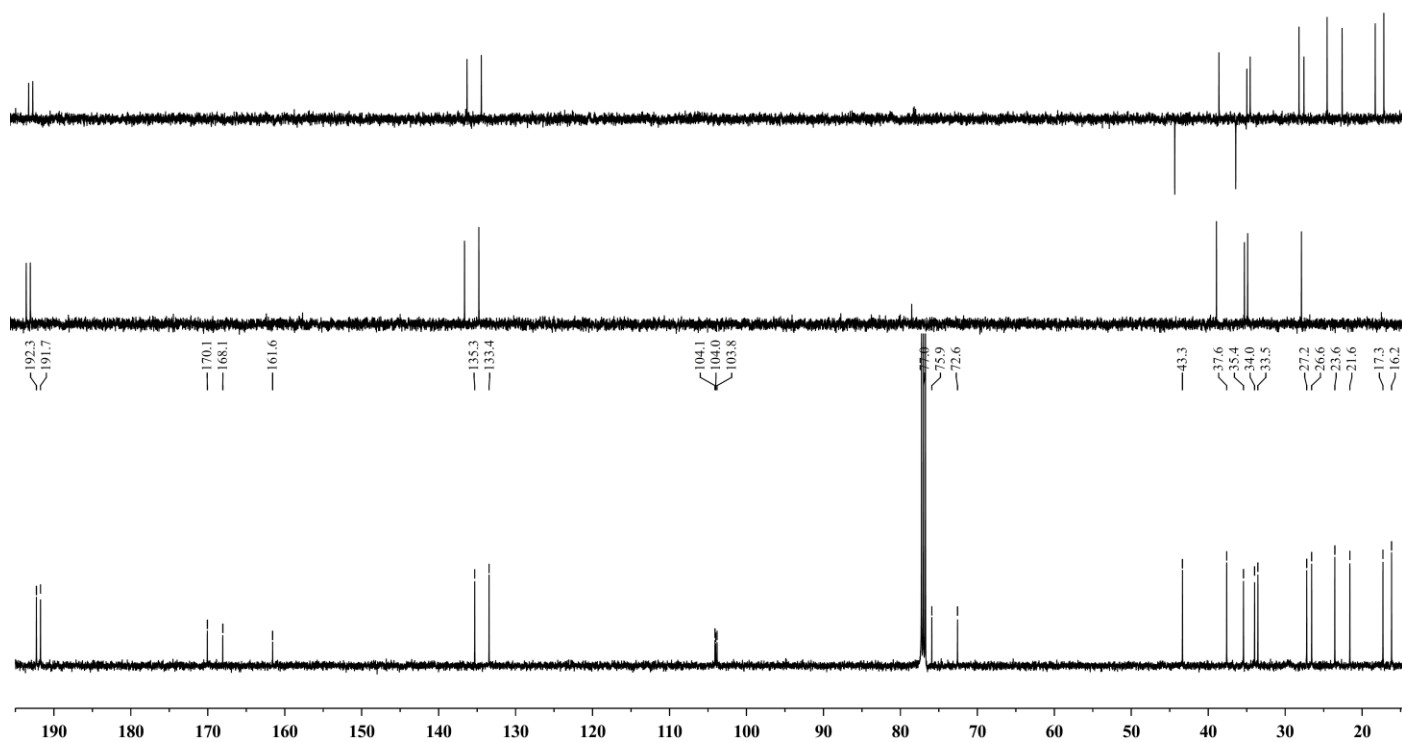

Figure S12 HSQC spectrum of **2**

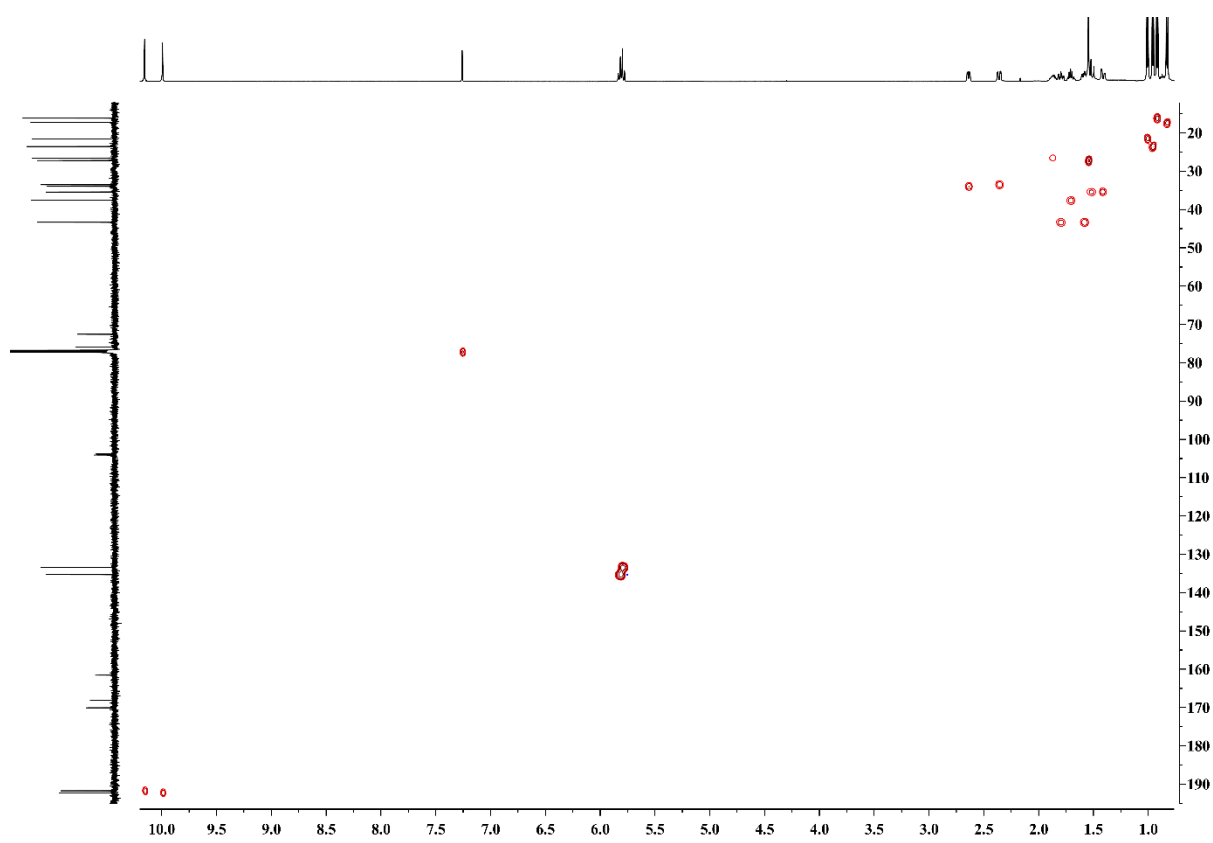

Figure S13 HMBC spectrum of **2**

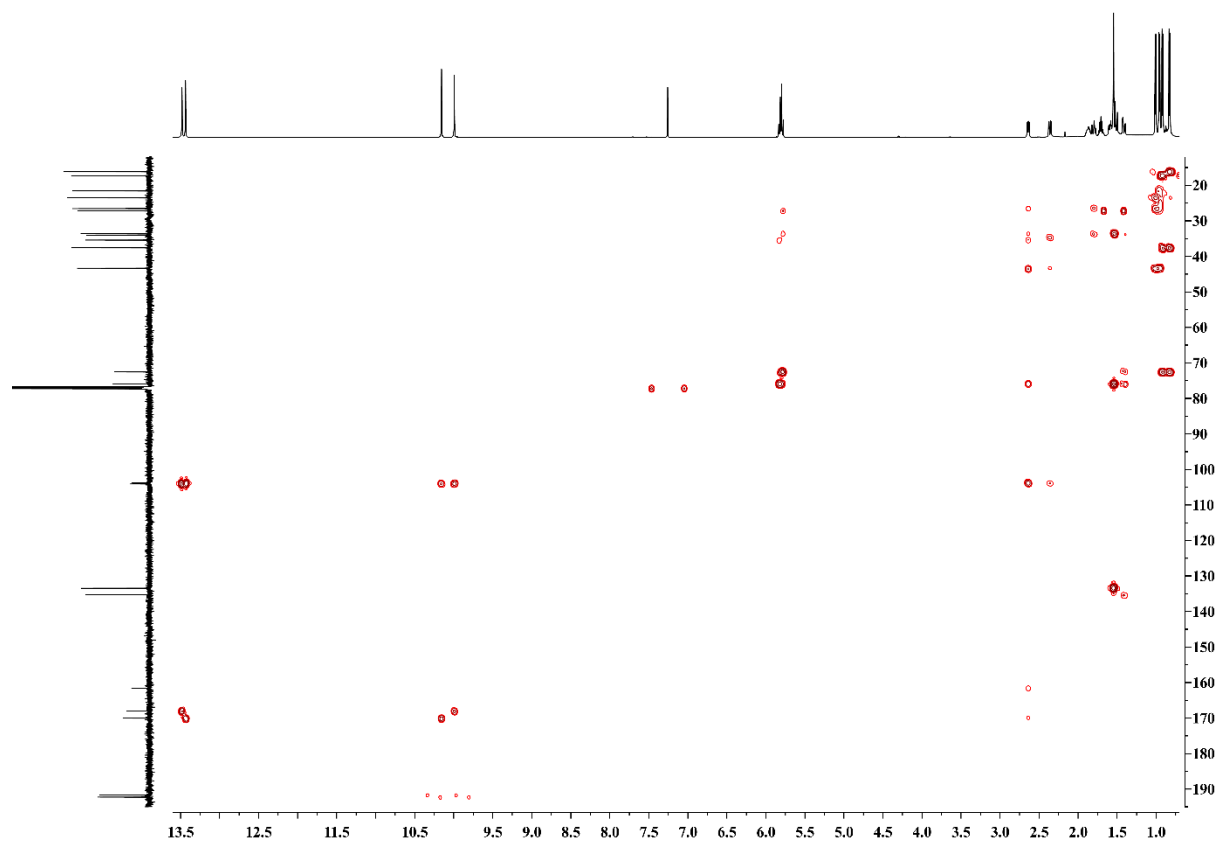

Figure S14  $^1\text{H}$ - $^1\text{H}$  COSY spectrum of **2**

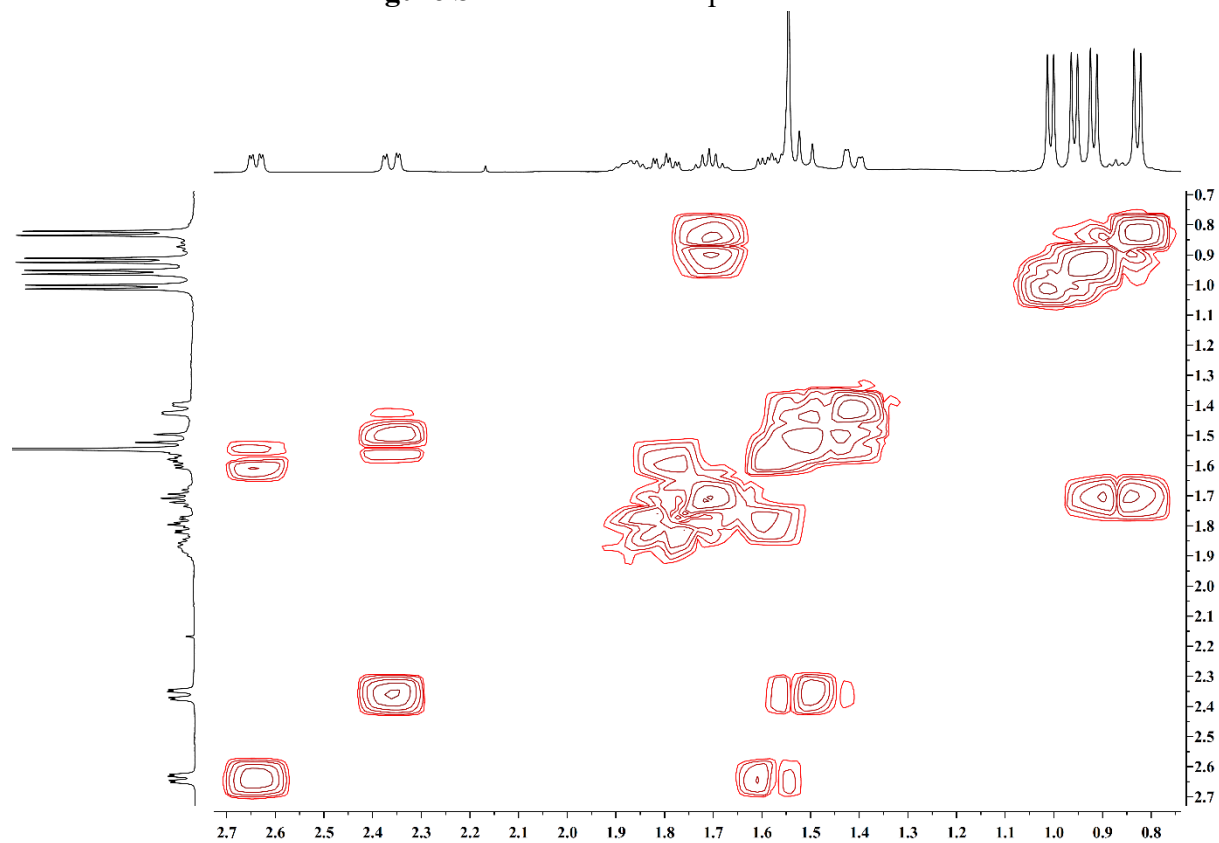

Figure S15 ROESY spectrum of 2

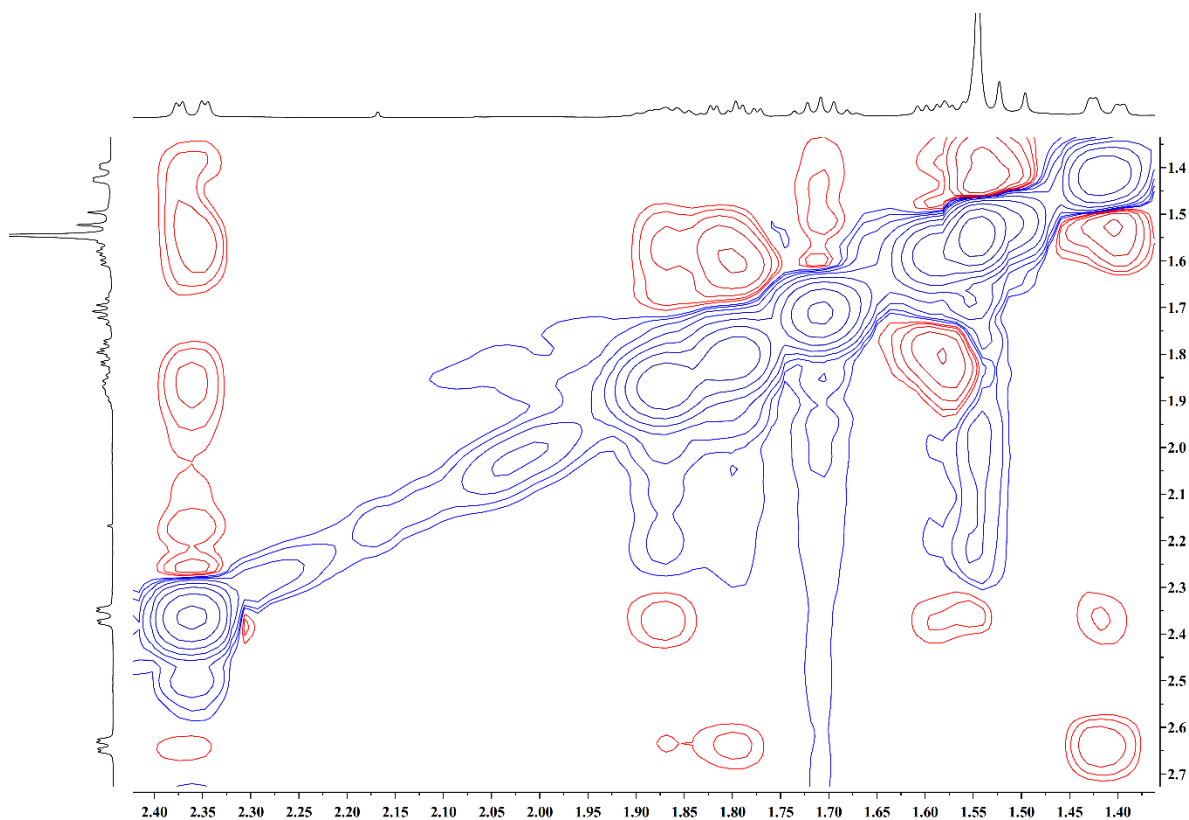

Figure S16 HRESIMS spectrum of 2

User Spectra

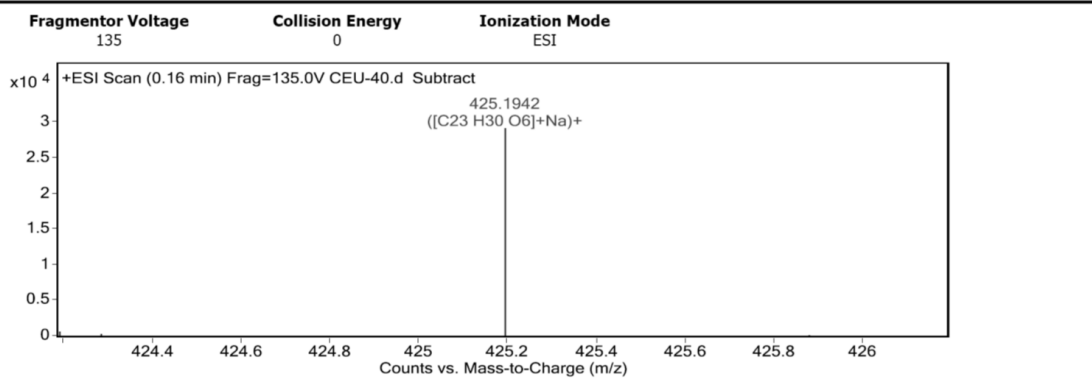

Peak List

| m/z      | z | Abund    | Formula    | Ion     |
|----------|---|----------|------------|---------|
| 212.1167 | 1 | 34253.24 |            |         |
| 262.1097 | 2 | 16016.45 |            |         |
| 301.1415 | 1 | 25177.3  |            |         |
| 317.1149 | 1 | 16980.58 |            |         |
| 425.1942 | 1 | 29122.36 | C23 H30 O6 | (M+Na)+ |
| 453.1698 | 1 | 20429.21 |            |         |
| 471.237  | 1 | 8633.81  |            |         |
| 623.2906 | 2 | 10431.4  |            |         |

Formula Calculator Element Limits

| Element | Min | Max |
|---------|-----|-----|
| C       | 3   | 60  |
| H       | 0   | 120 |
| O       | 0   | 30  |

Formula Calculator Results

| Formula    | CalculatedMass | CalculatedMz | Mz       | Diff. (mDa) | Diff. (ppm) | DBE    |
|------------|----------------|--------------|----------|-------------|-------------|--------|
| C23 H30 O6 | 402.2042       | 425.1935     | 425.1942 | -0.70       | -1.65       | 9.0000 |

Figure S17  $^1\text{H}$  NMR spectrum of **3** (800 MHz,  $\text{CDCl}_3$ )

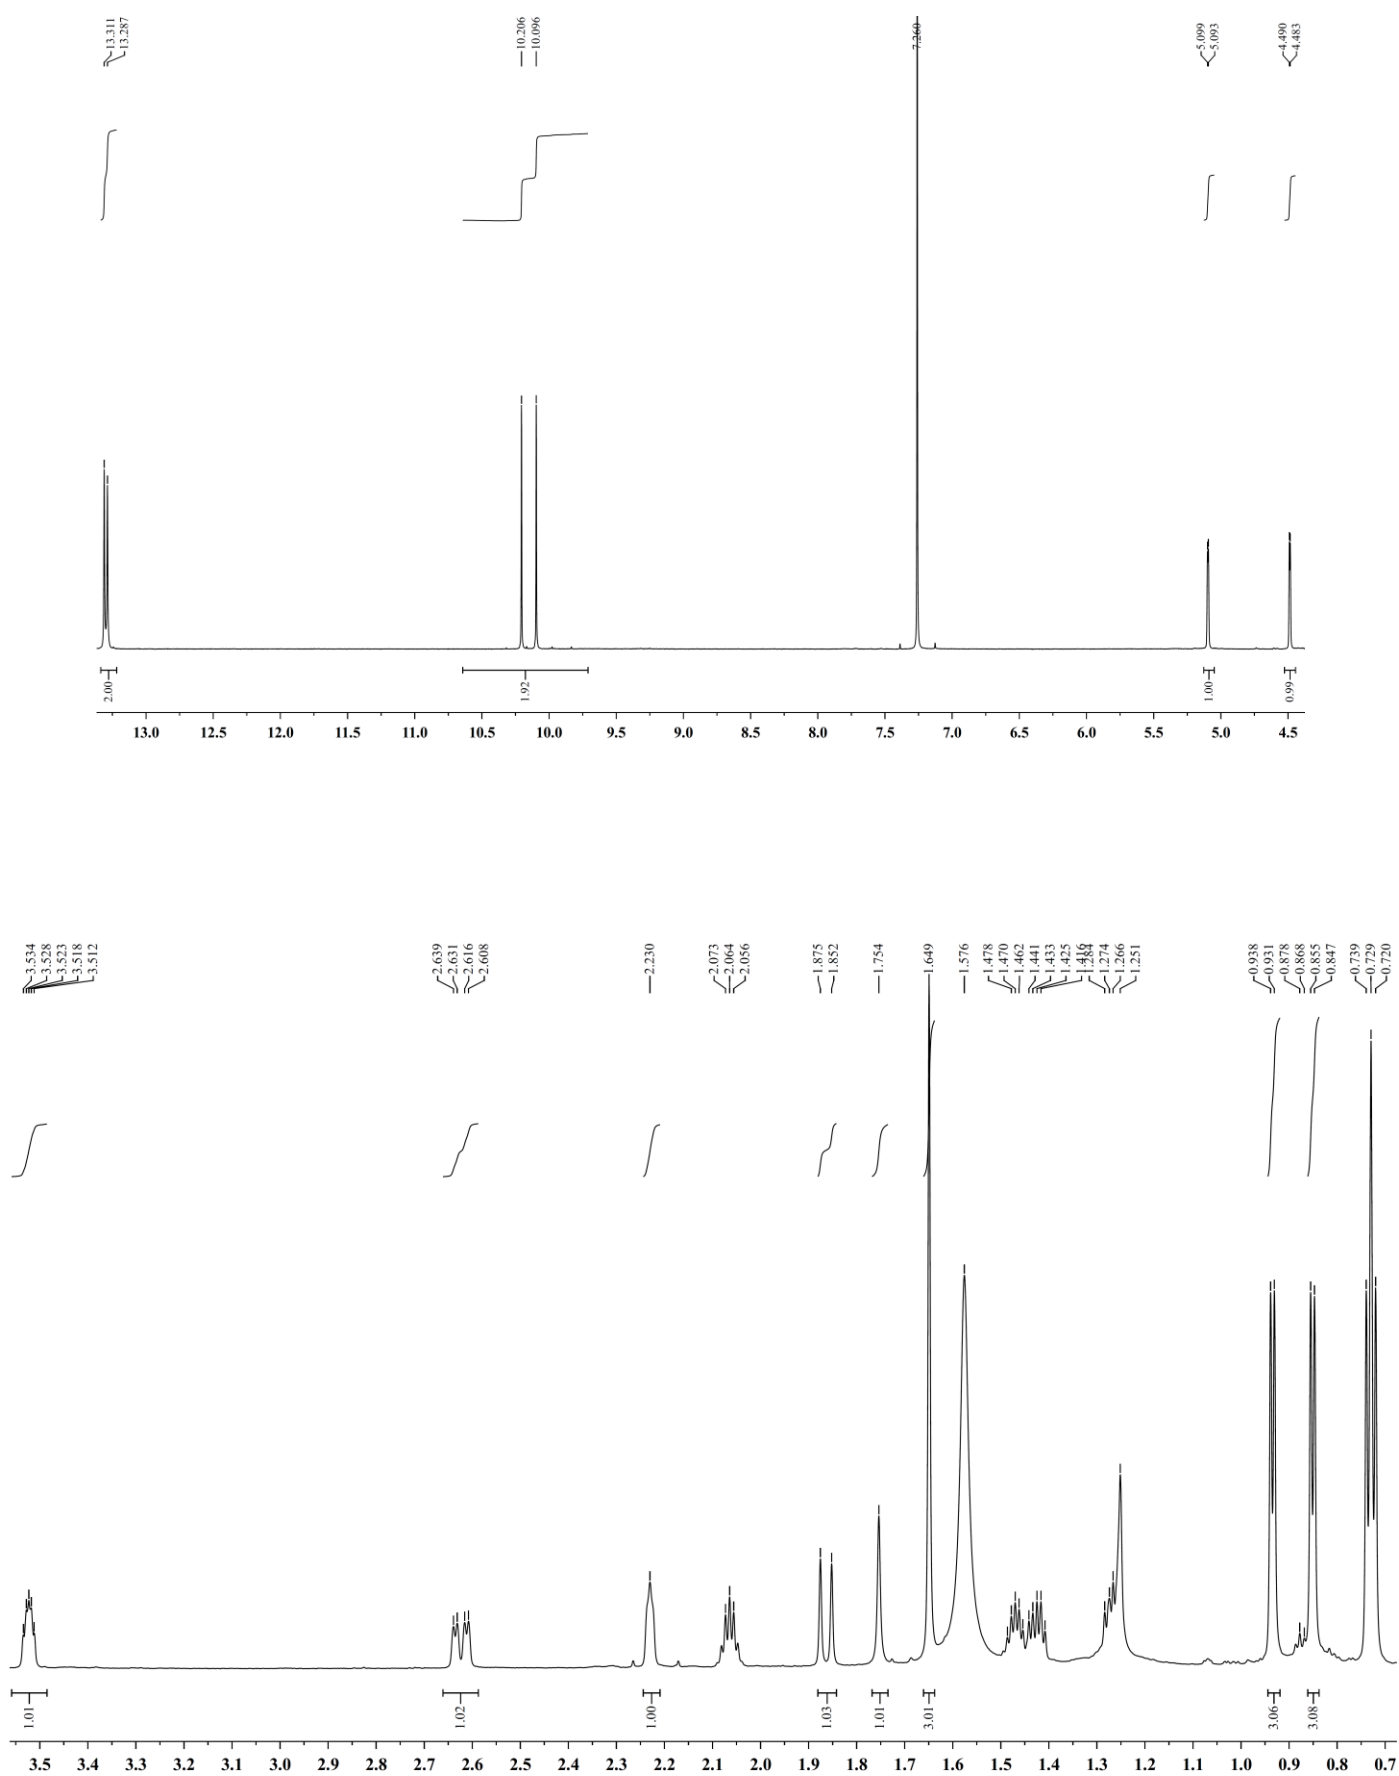

Figure S18  $^{13}\text{C}$  NMR spectrum of **3** (200 MHz,  $\text{CDCl}_3$ )

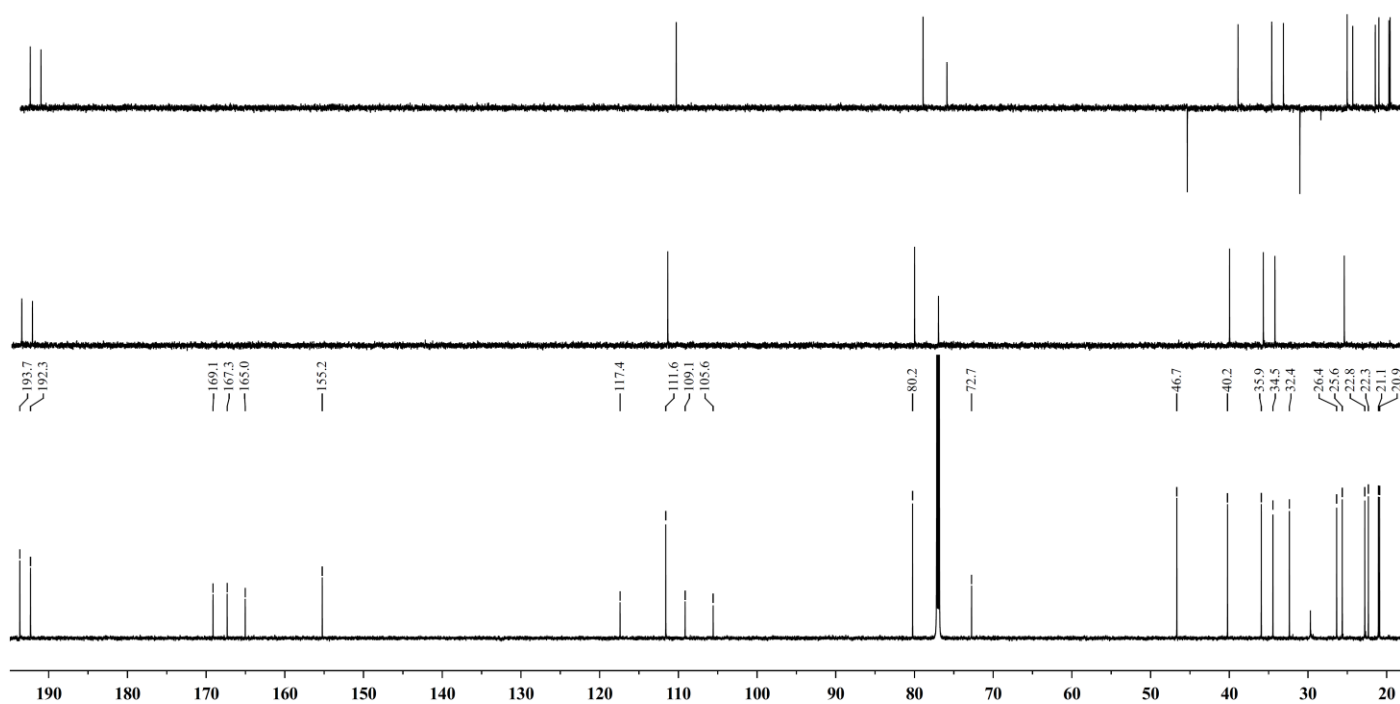

Figure S19 HSQC spectrum of **3**

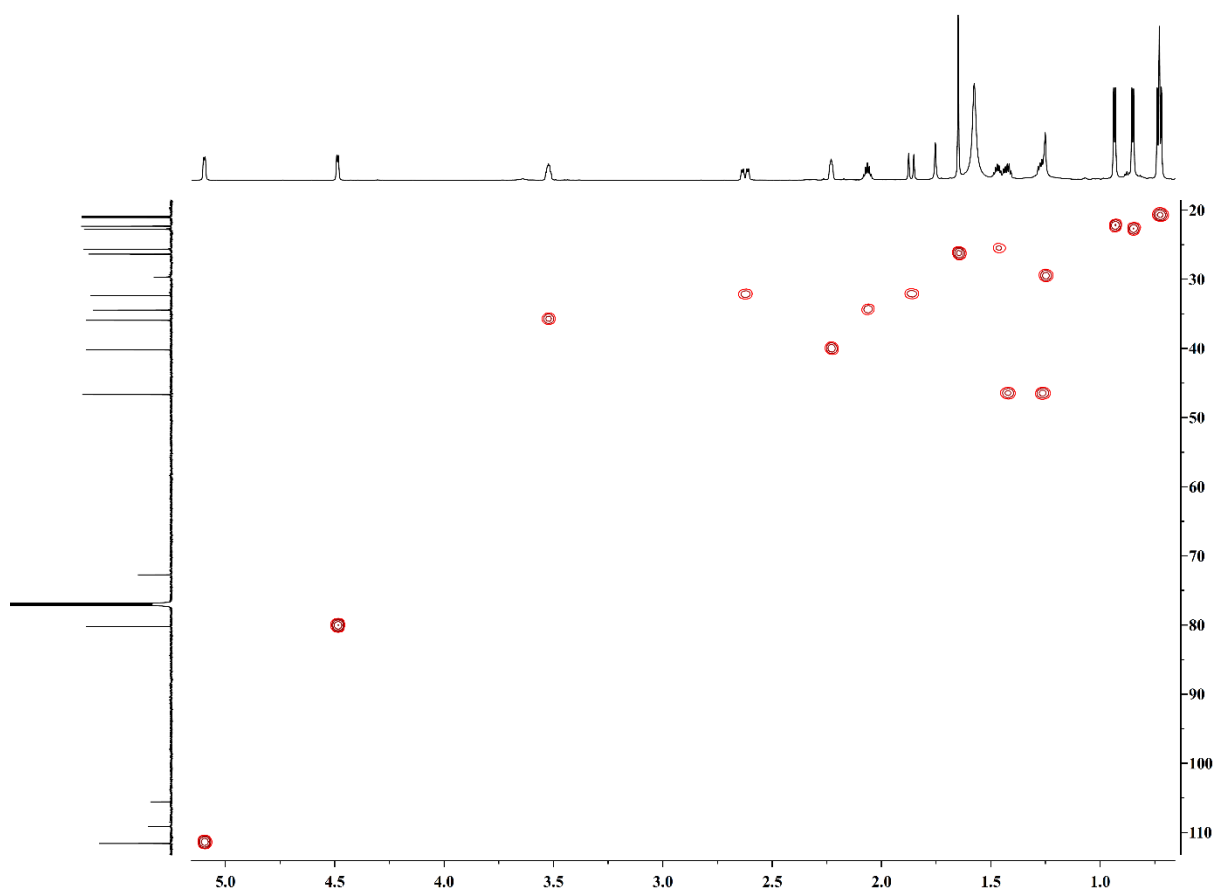

Figure S20 HMBC spectrum of **3**

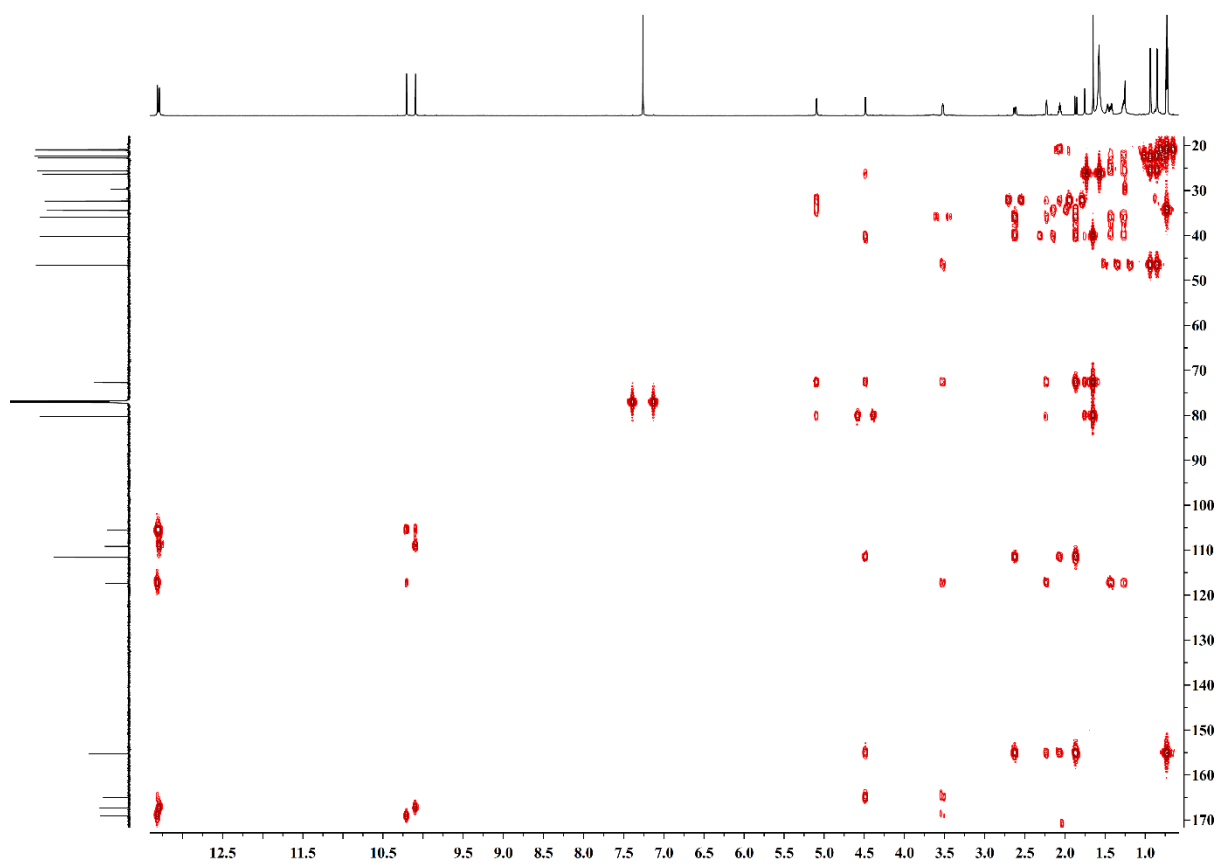

Figure S21  $^1\text{H}$ - $^1\text{H}$  COSY spectrum of **3**

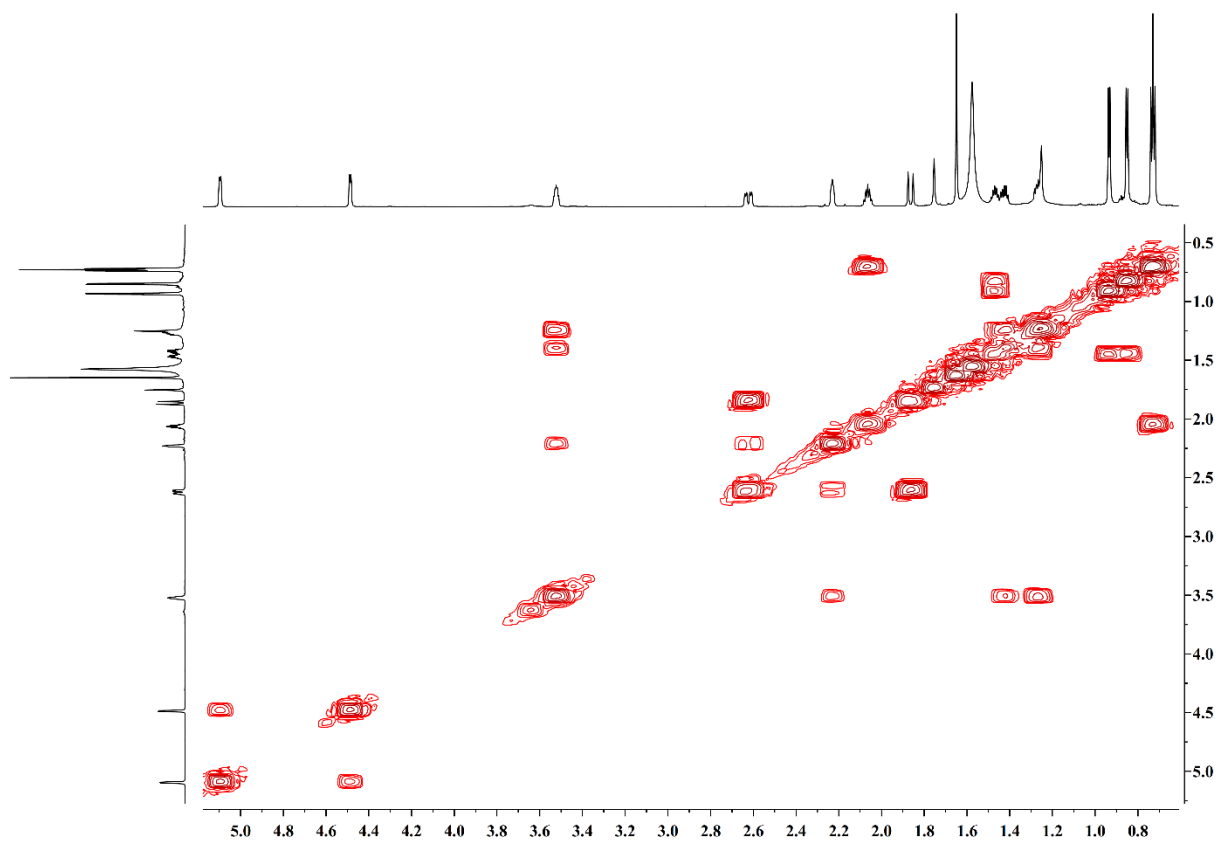

Figure S22 ROESY spectrum of 3

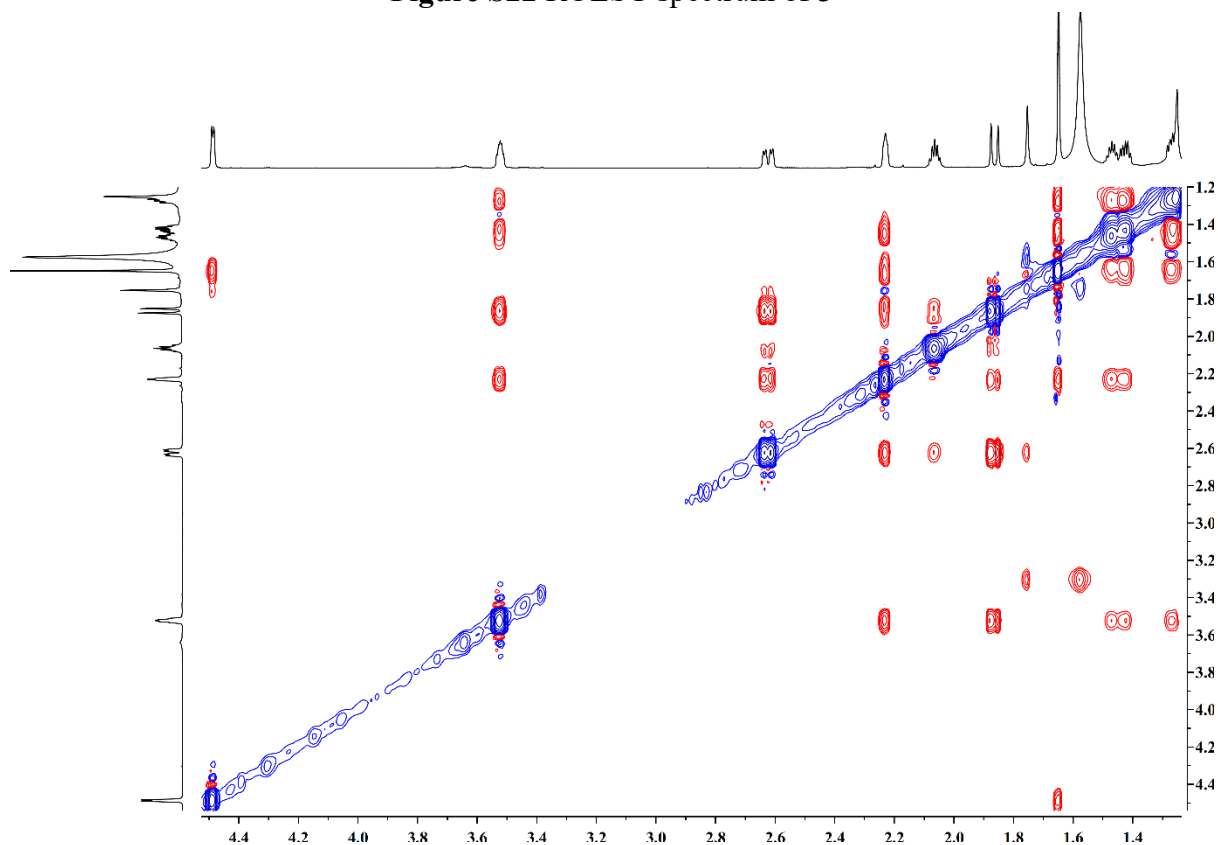

Figure S23 HRESIMS spectrum of 3

User Spectra

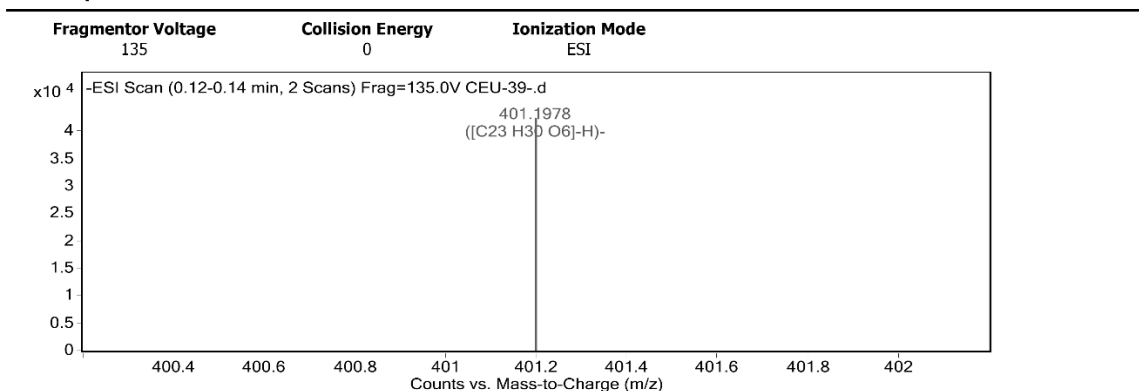

Peak List

| m/z       | z | Abund     | Formula    | Ion    |
|-----------|---|-----------|------------|--------|
| 96.9696   |   | 80985.78  |            |        |
| 112.9853  | 1 | 64266.77  |            |        |
| 401.1978  | 1 | 42660.04  | C23 H30 O6 | (M-H)- |
| 955.9718  | 1 | 23164.42  |            |        |
| 982.995   | 1 | 200408.41 |            |        |
| 983.9939  | 1 | 32954.03  |            |        |
| 996.0123  | 1 | 22085.45  |            |        |
| 1033.9889 | 1 | 38626.57  |            |        |

Formula Calculator Element Limits

| Element | Min | Max |
|---------|-----|-----|
| C       | 3   | 60  |
| H       | 0   | 120 |
| O       | 0   | 30  |

Formula Calculator Results

| Formula    | CalculatedMass | CalculatedMz | Mz       | Diff. (mDa) | Diff. (ppm) | DBE    |
|------------|----------------|--------------|----------|-------------|-------------|--------|
| C23 H30 O6 | 402.2042       | 401.1970     | 401.1978 | -0.80       | -1.99       | 9.0000 |

Figure S24  $^1\text{H}$  NMR spectrum of **4** (500 MHz,  $\text{CDCl}_3$ )

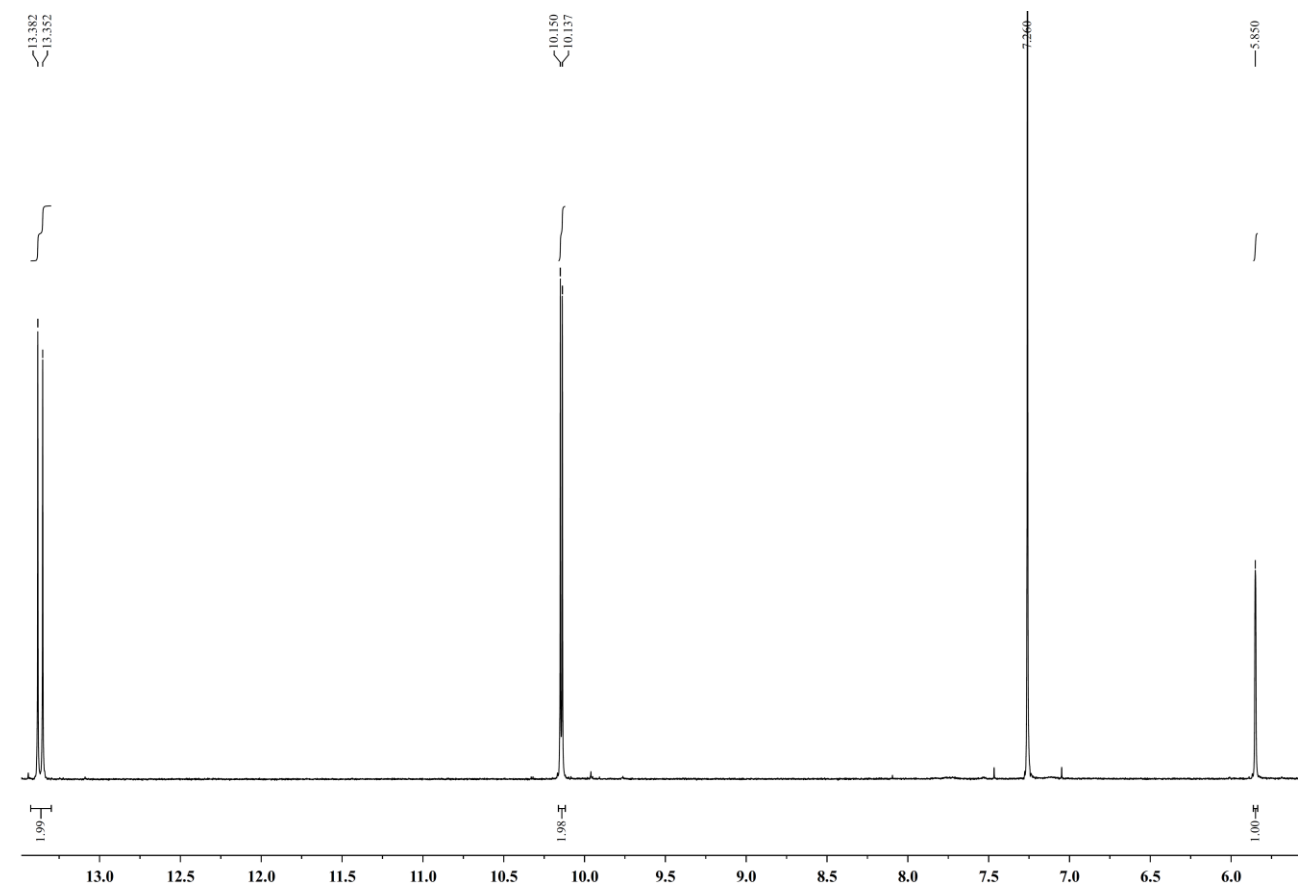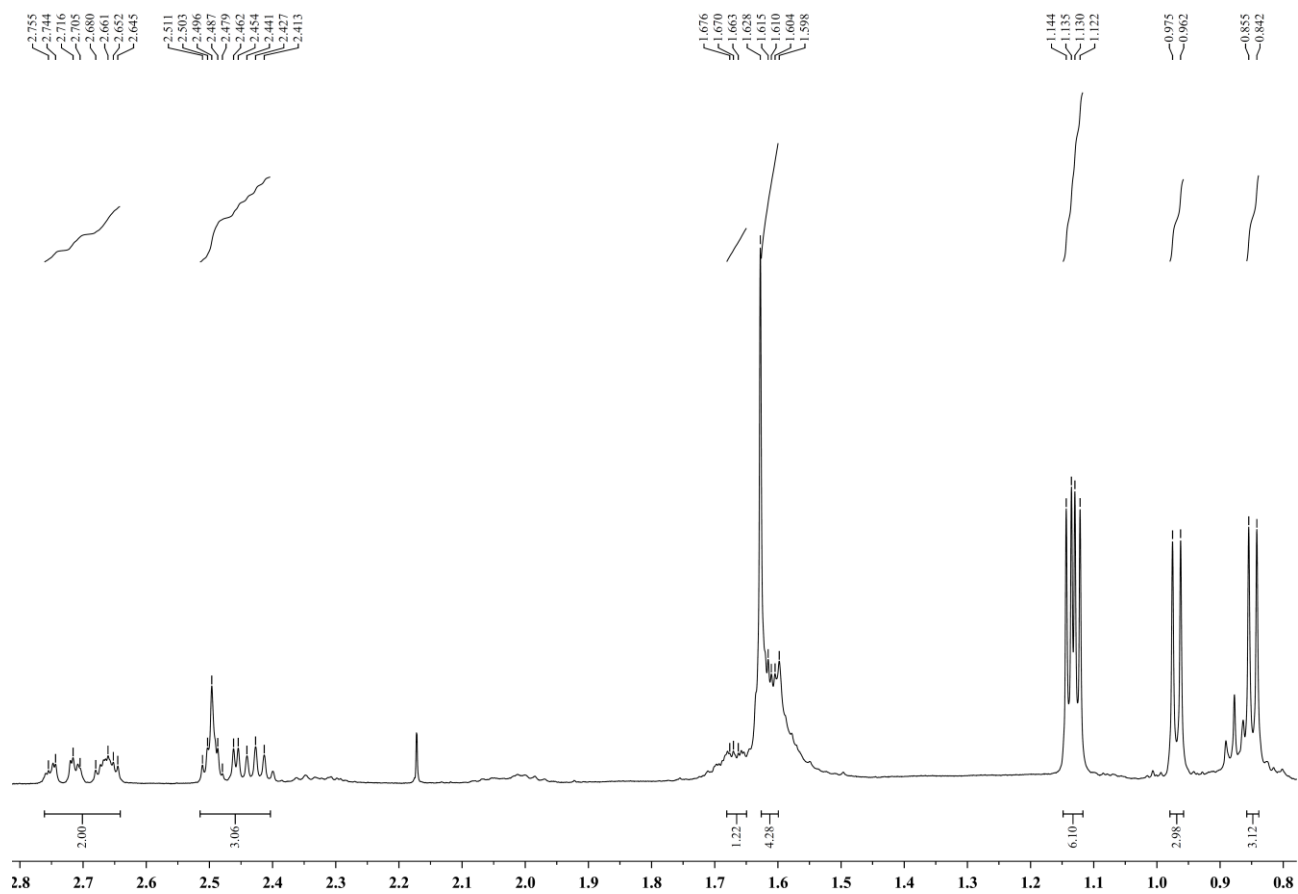



Figure S25  $^{13}\text{C}$  NMR spectrum of 4 (125 MHz,  $\text{CDCl}_3$ )

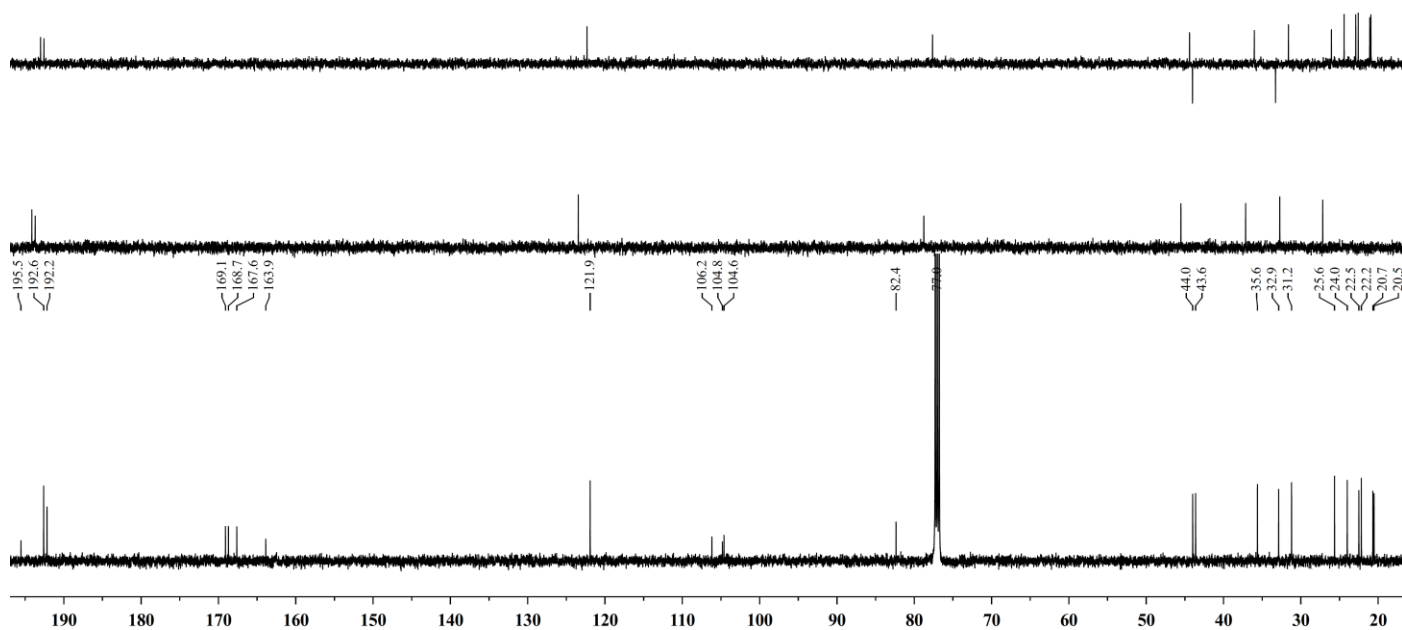

Figure S26 HSQC spectrum of 4

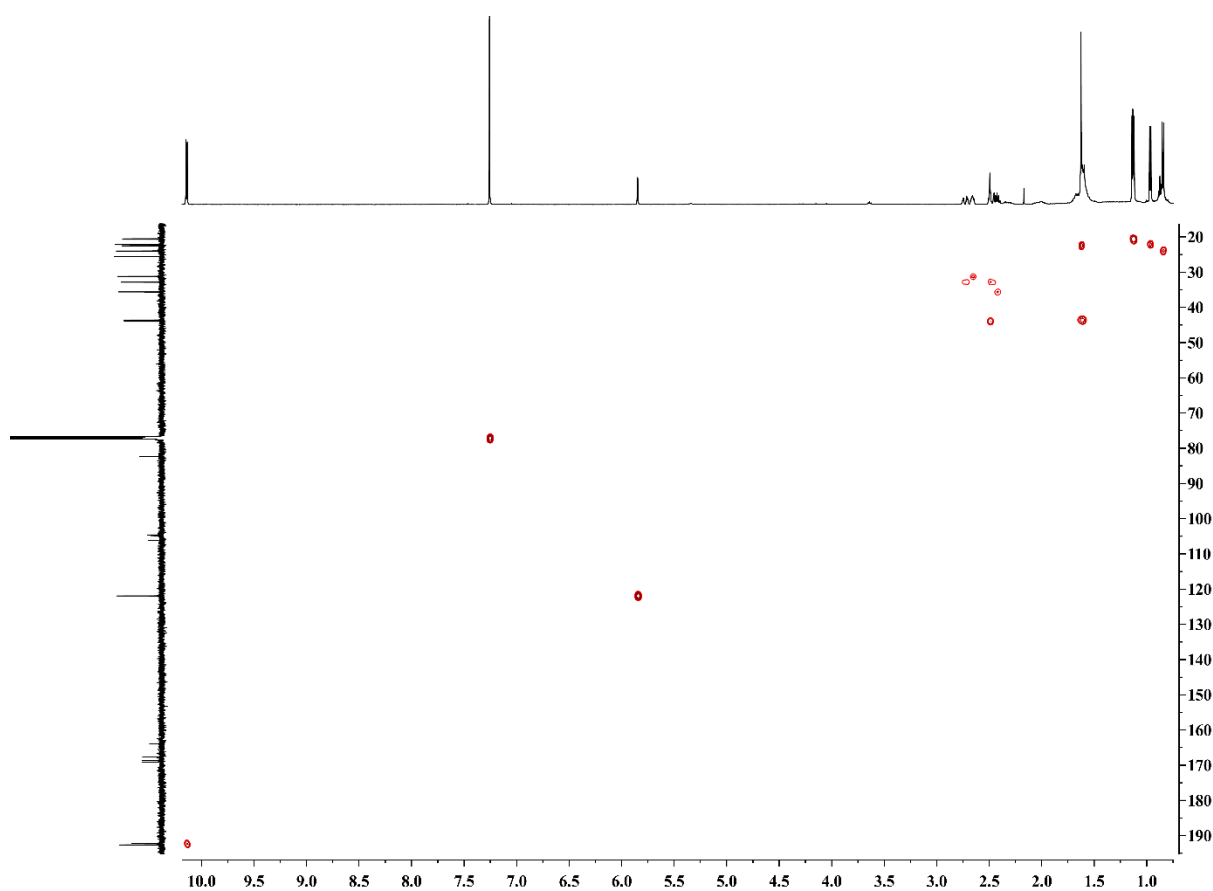

Figure S27 HMBC spectrum of 4

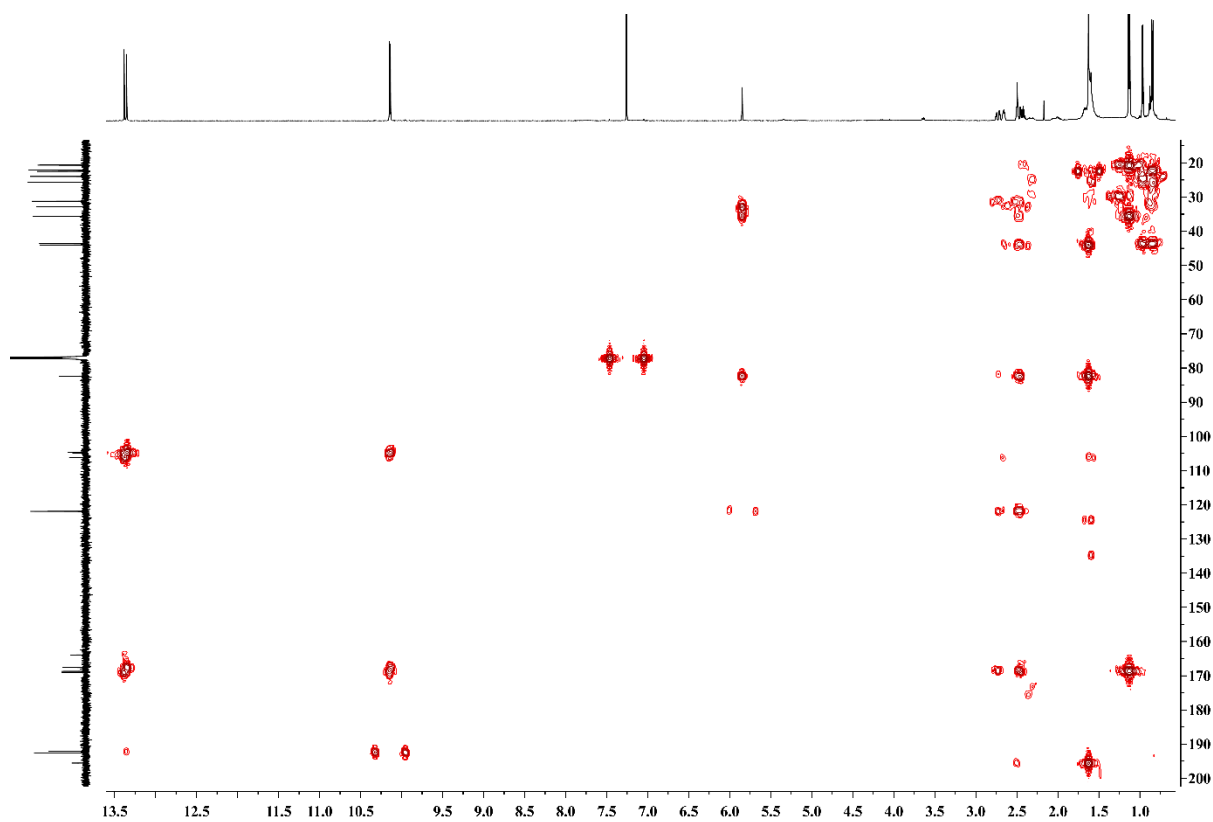

Figure S28  $^1\text{H}$ - $^1\text{H}$  COSY spectrum of 4

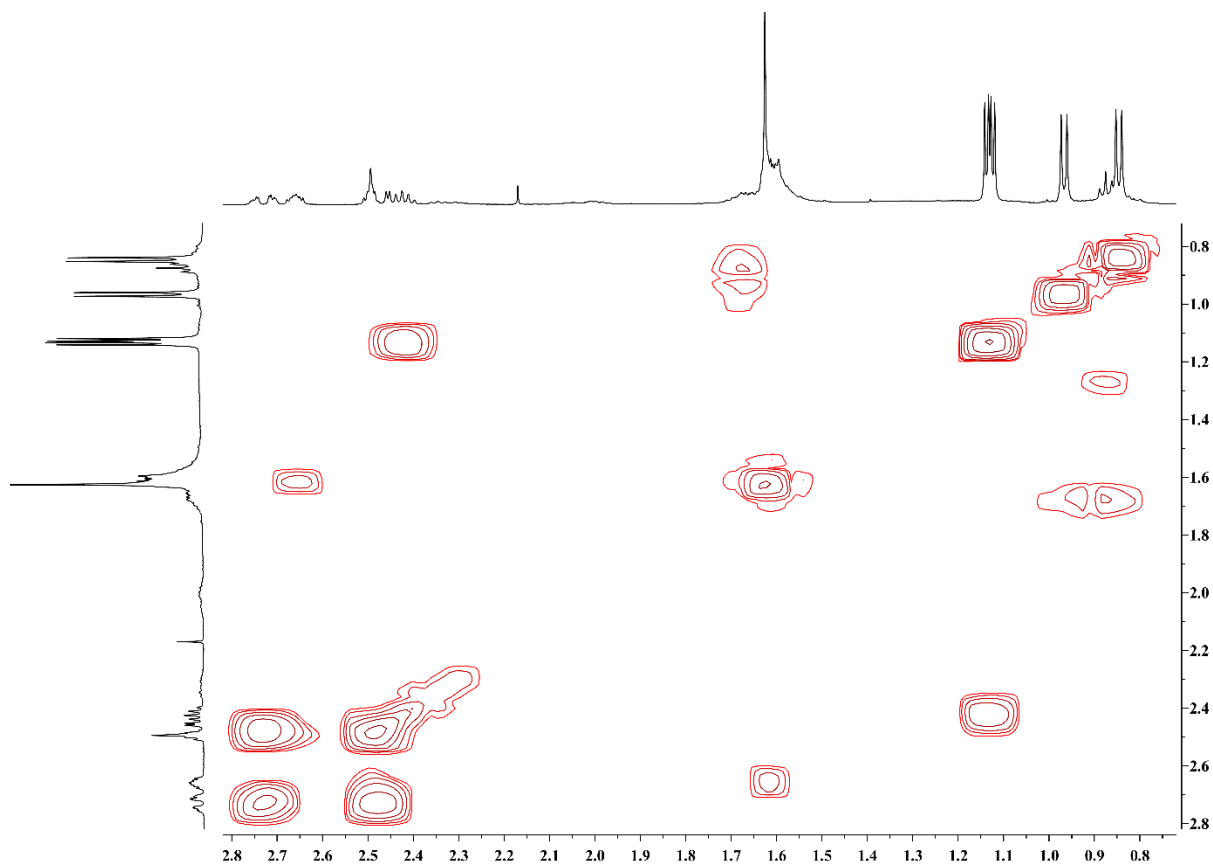

Figure S29 ROESY spectrum of 4

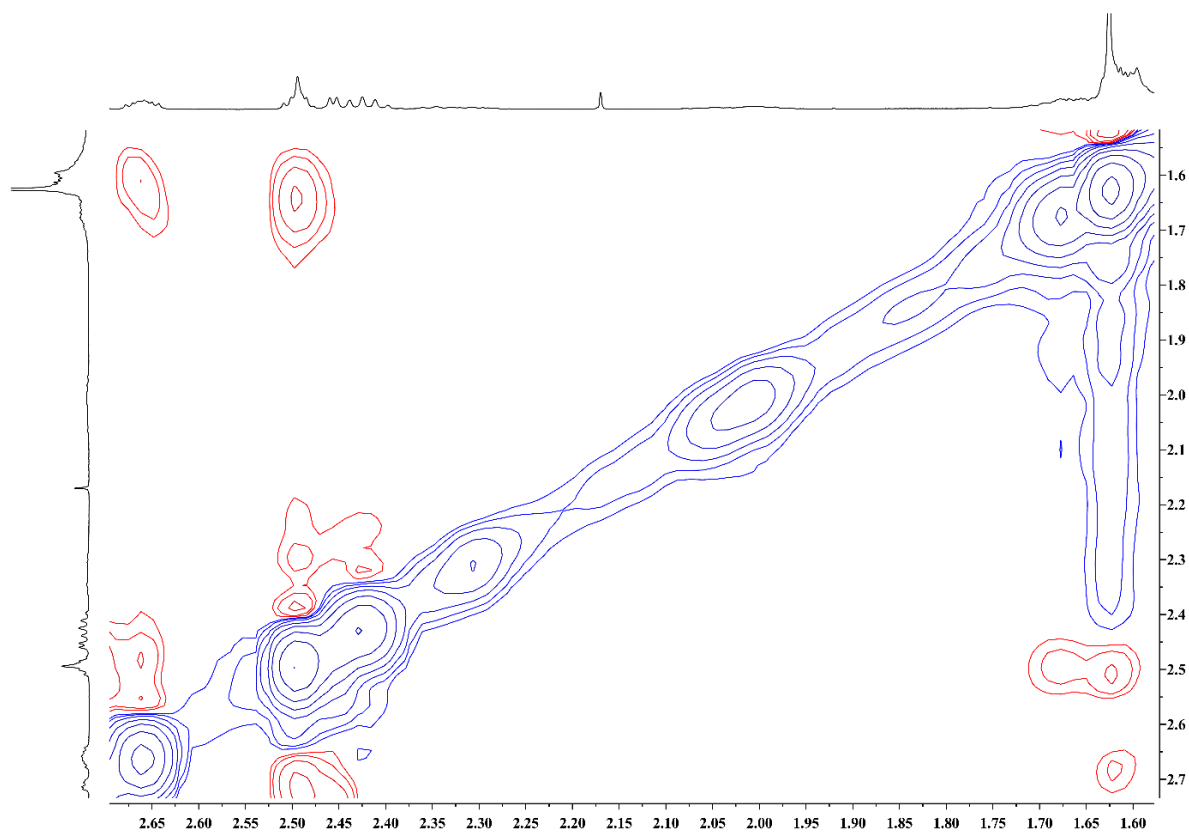

Figure S30 HRESIMS spectrum of 4

User Spectra

Fragmentor Voltage: 135  
Collision Energy: 0  
Ionization Mode: ESI

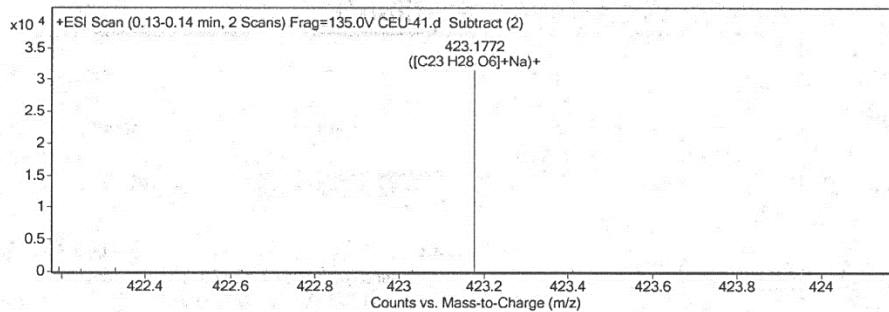

Peak List

| m/z      | z | Abund     | Formula    | Ion     |
|----------|---|-----------|------------|---------|
| 102.1279 | 1 | 547299.38 |            |         |
| 103.1311 | 1 | 37837.59  |            |         |
| 299.1093 | 1 | 31369.39  |            |         |
| 301.1407 | 1 | 217539.23 |            |         |
| 302.144  | 1 | 36303.66  |            |         |
| 305.1566 | 1 | 76515.82  |            |         |
| 317.1147 | 1 | 93489.31  |            |         |
| 321.1304 | 1 | 30060.03  |            |         |
| 423.1772 | 1 | 31510.83  | C23 H28 O6 | (M+Na)+ |
| 579.2923 | 1 | 52332.01  |            |         |

Formula Calculator Element Limits

| Element | Min | Max |
|---------|-----|-----|
| C       | 3   | 60  |
| H       | 0   | 120 |
| O       | 0   | 30  |

Formula Calculator Results

| Formula    | CalculatedMass | CalculatedMz | Mz       | Diff. (mDa) | Diff. (ppm) | DBE     |
|------------|----------------|--------------|----------|-------------|-------------|---------|
| C23 H28 O6 | 400.1886       | 423.1778     | 423.1772 | 0.60        | 1.42        | 10.0000 |

Figure S31  $^1\text{H}$  NMR spectrum of **5** (500 MHz,  $\text{CDCl}_3$ )

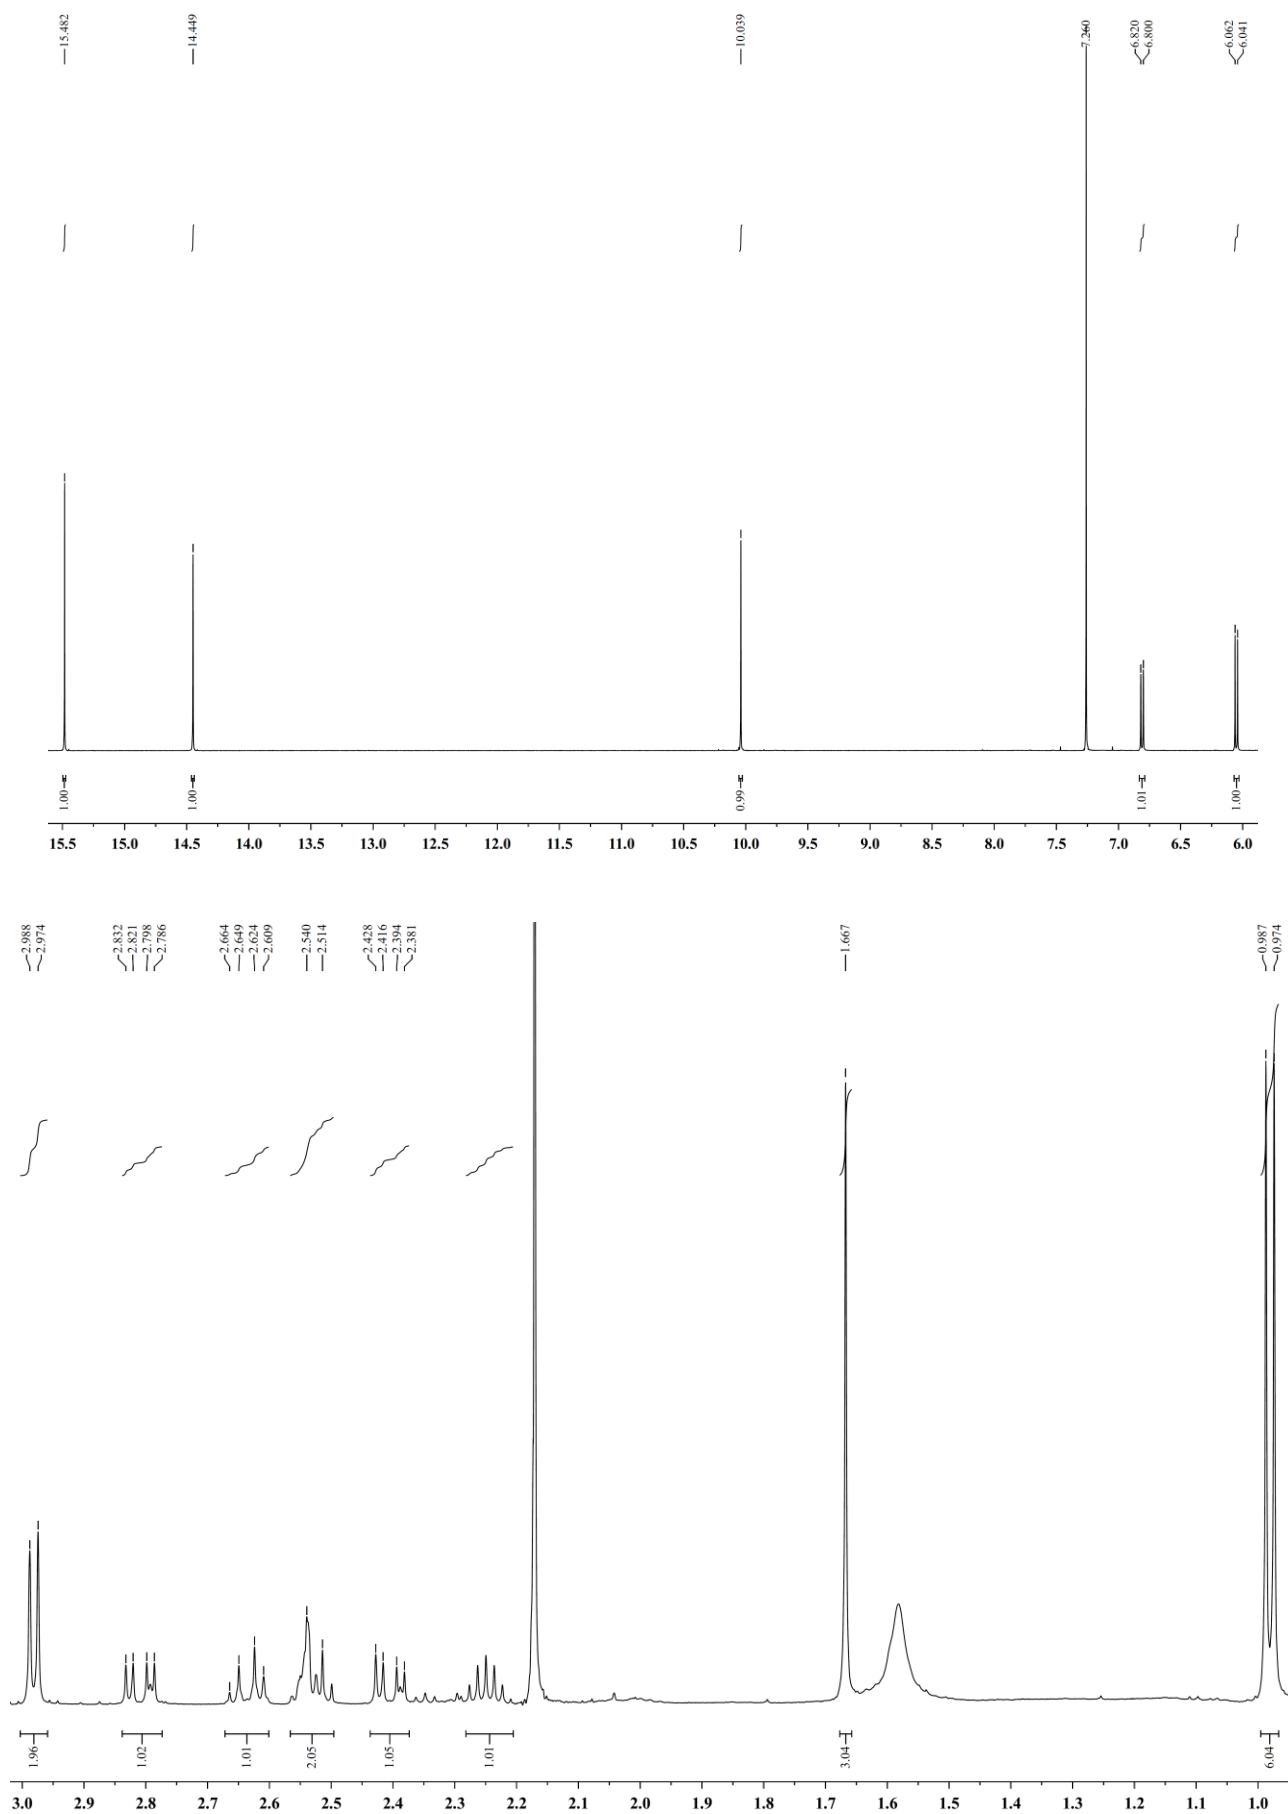

Figure S32  $^{13}\text{C}$  NMR spectrum of **5** (125 MHz,  $\text{CDCl}_3$ )

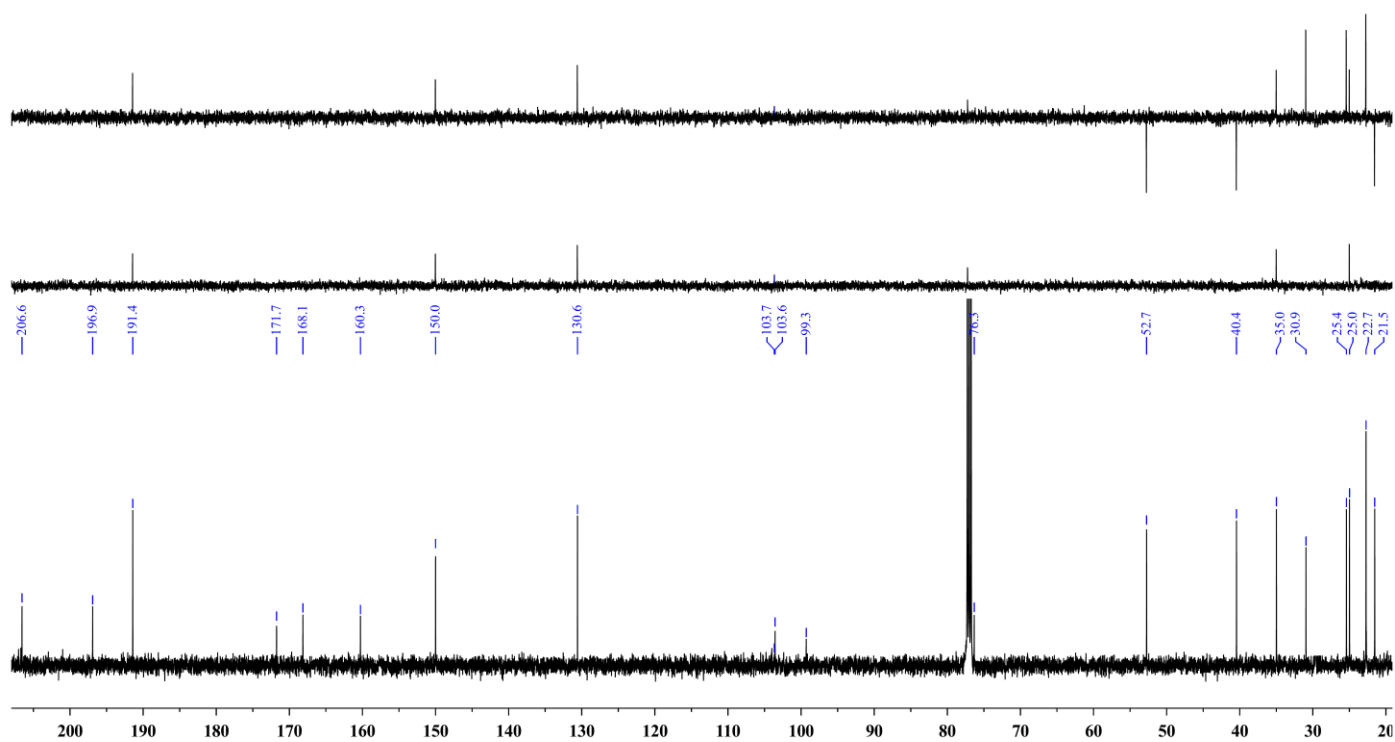

Figure S33 HSQC spectrum of **5**

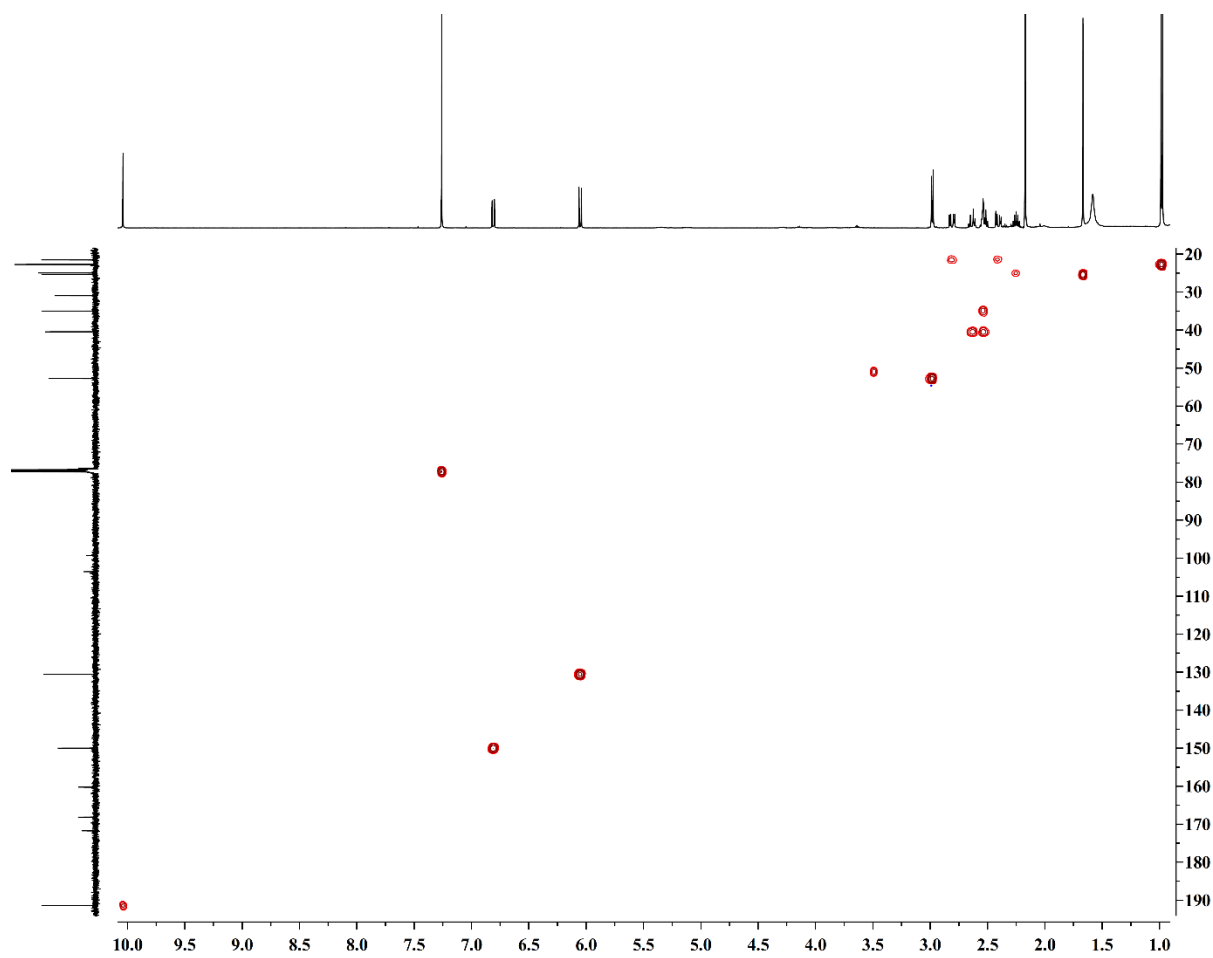

Figure S34 HMBC spectrum of **5**

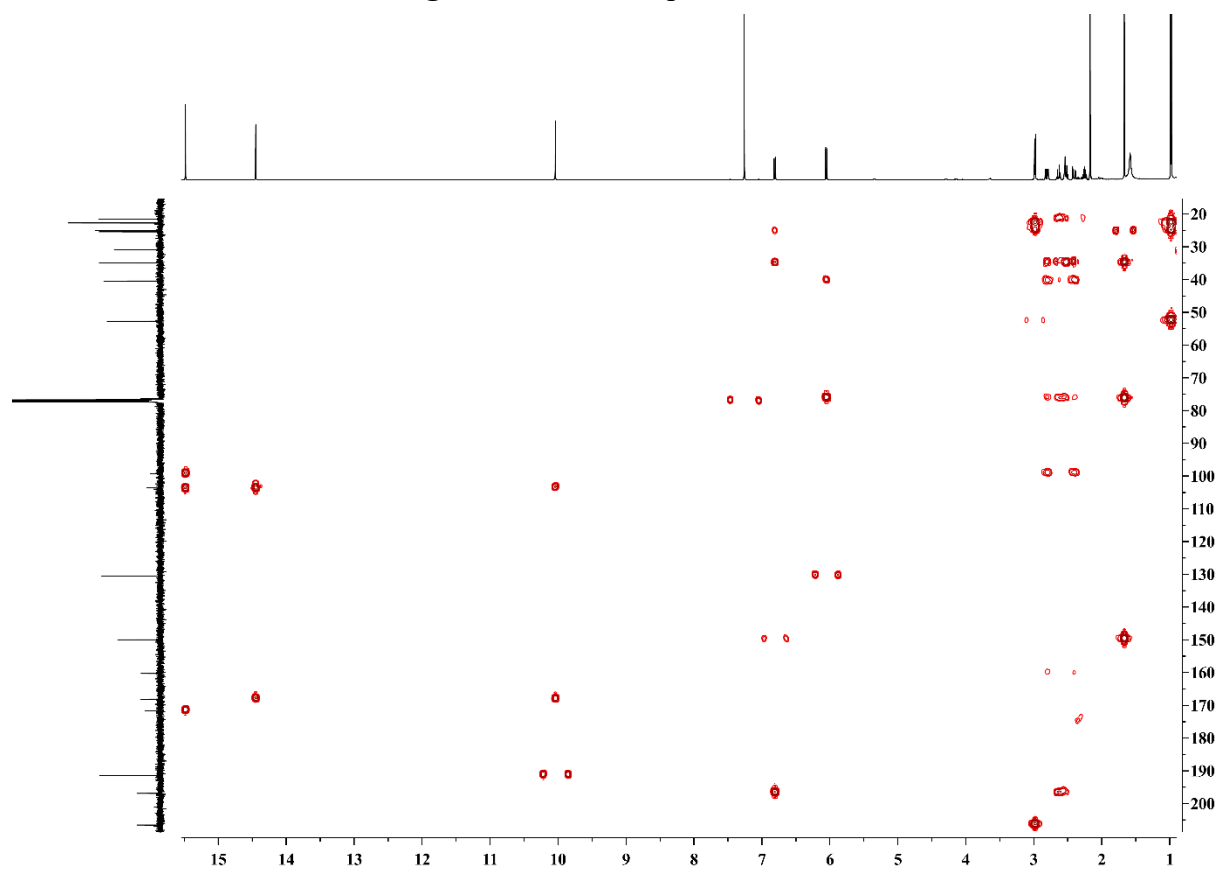

Figure S35  $^1\text{H}$ - $^1\text{H}$  COSY spectrum of **5**

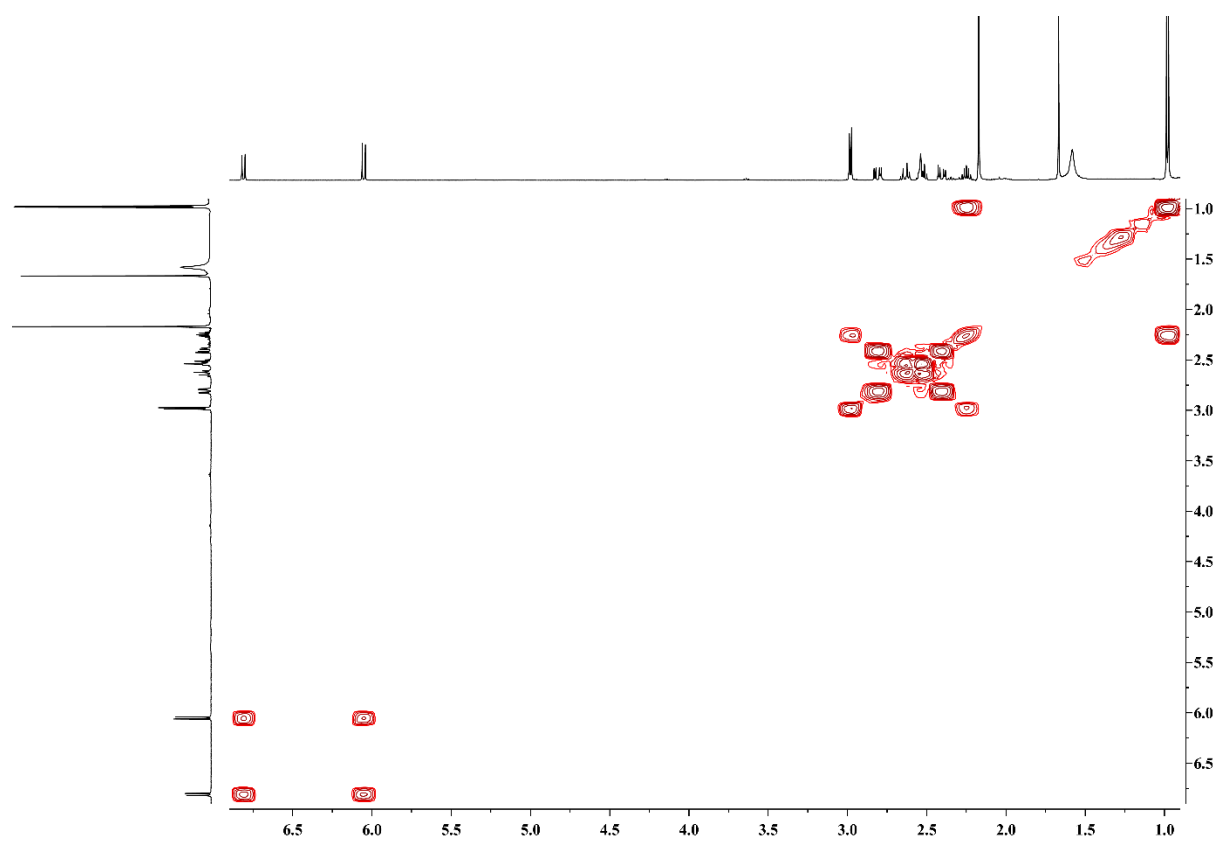

Figure S36 ROESY spectrum of 5

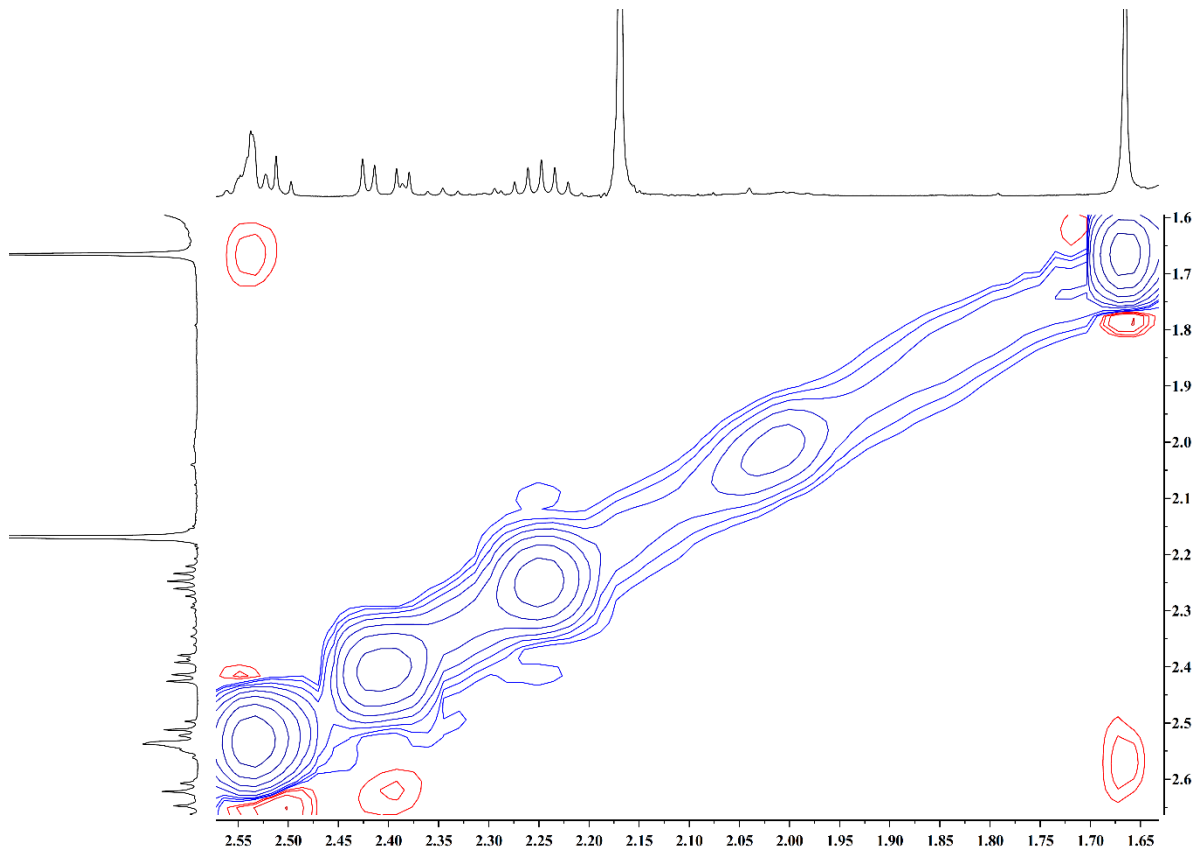

Figure S37 HRESIMS spectrum of 5

User Spectra

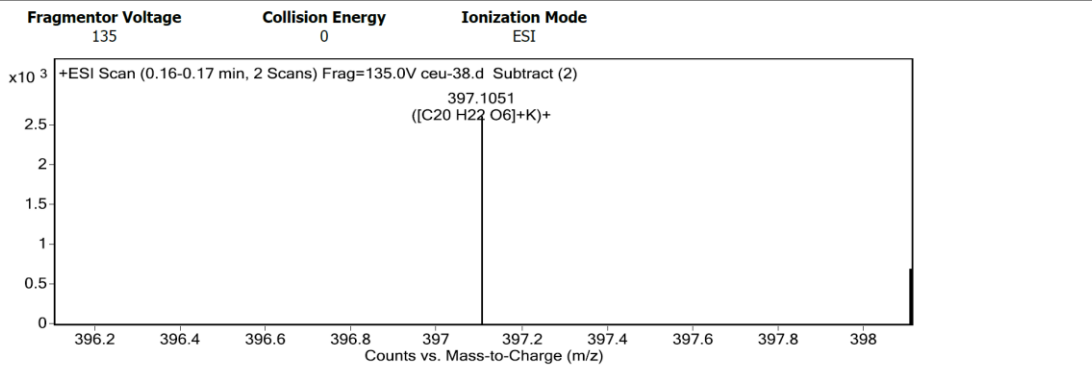

Peak List

| m/z      | z | Abund   | Formula                                        | Ion                |
|----------|---|---------|------------------------------------------------|--------------------|
| 299.1104 |   | 1642.38 |                                                |                    |
| 397.1051 | 1 | 2617.18 | C <sub>20</sub> H <sub>22</sub> O <sub>6</sub> | (M+K) <sup>+</sup> |
| 486.322  | 1 | 4717.21 |                                                |                    |
| 487.325  | 1 | 1856.47 |                                                |                    |
| 529.4404 | 1 | 1980.77 |                                                |                    |
| 543.4557 | 1 | 1933.51 |                                                |                    |
| 764.5753 | 1 | 1882.27 |                                                |                    |
| 765.5764 | 1 | 1455.62 |                                                |                    |

Formula Calculator Element Limits

| Element | Min | Max |
|---------|-----|-----|
| C       | 3   | 60  |
| H       | 0   | 120 |
| O       | 0   | 10  |

Formula Calculator Results

| Formula                                        | CalculatedMass | CalculatedMz | Mz       | Diff. (mDa) | Diff. (ppm) | DBE     |
|------------------------------------------------|----------------|--------------|----------|-------------|-------------|---------|
| C <sub>20</sub> H <sub>22</sub> O <sub>6</sub> | 358.1416       | 397.1048     | 397.1051 | -0.30       | -0.76       | 10.0000 |

Figure S38  $^1\text{H}$  NMR spectrum of **6** (500 MHz,  $\text{CD}_3\text{OD}$ )

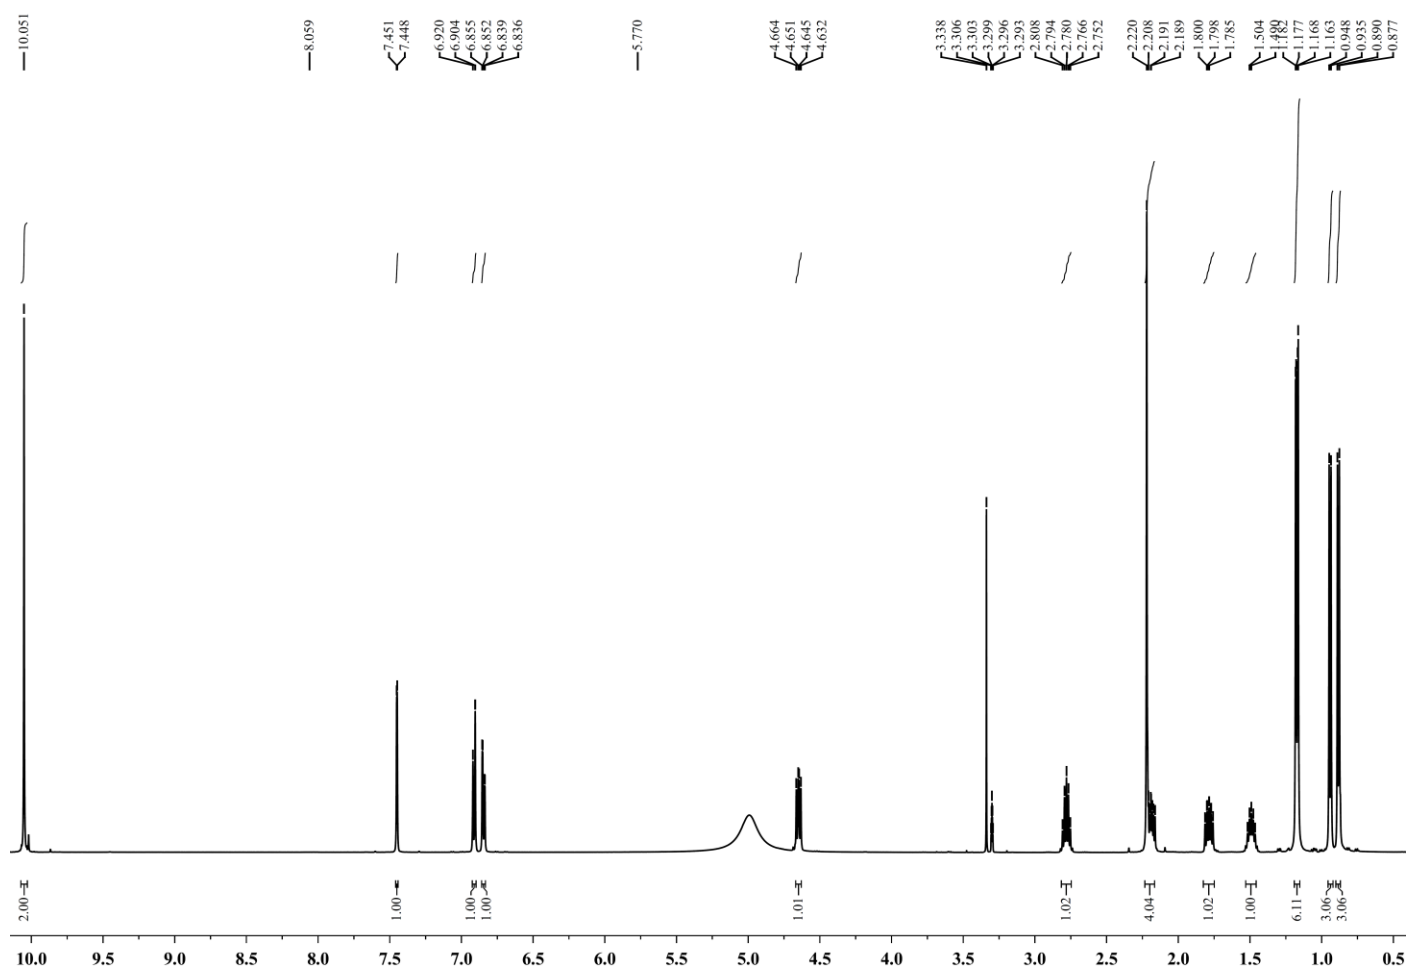

Figure S39  $^{13}\text{C}$  NMR spectrum of **6** (125 MHz,  $\text{CD}_3\text{OD}$ )

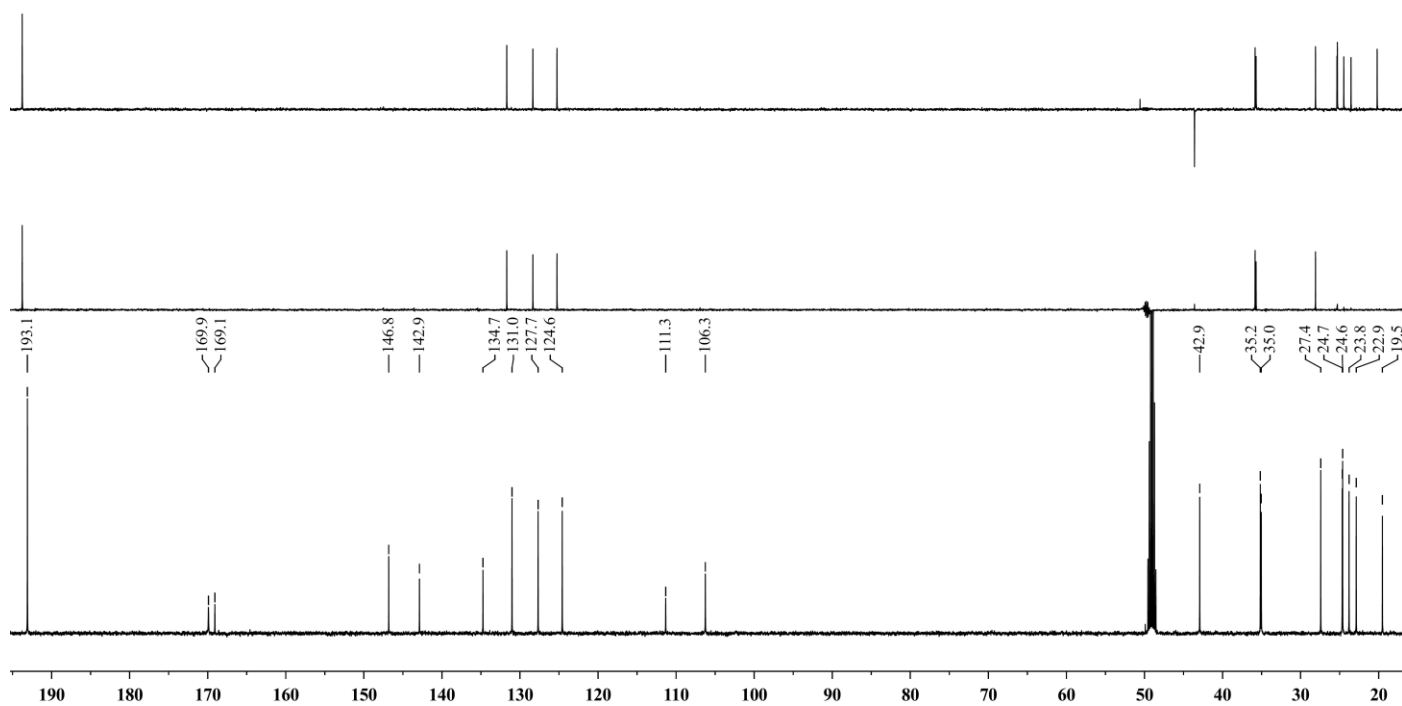



Figure S40 HSQC spectrum of **6**

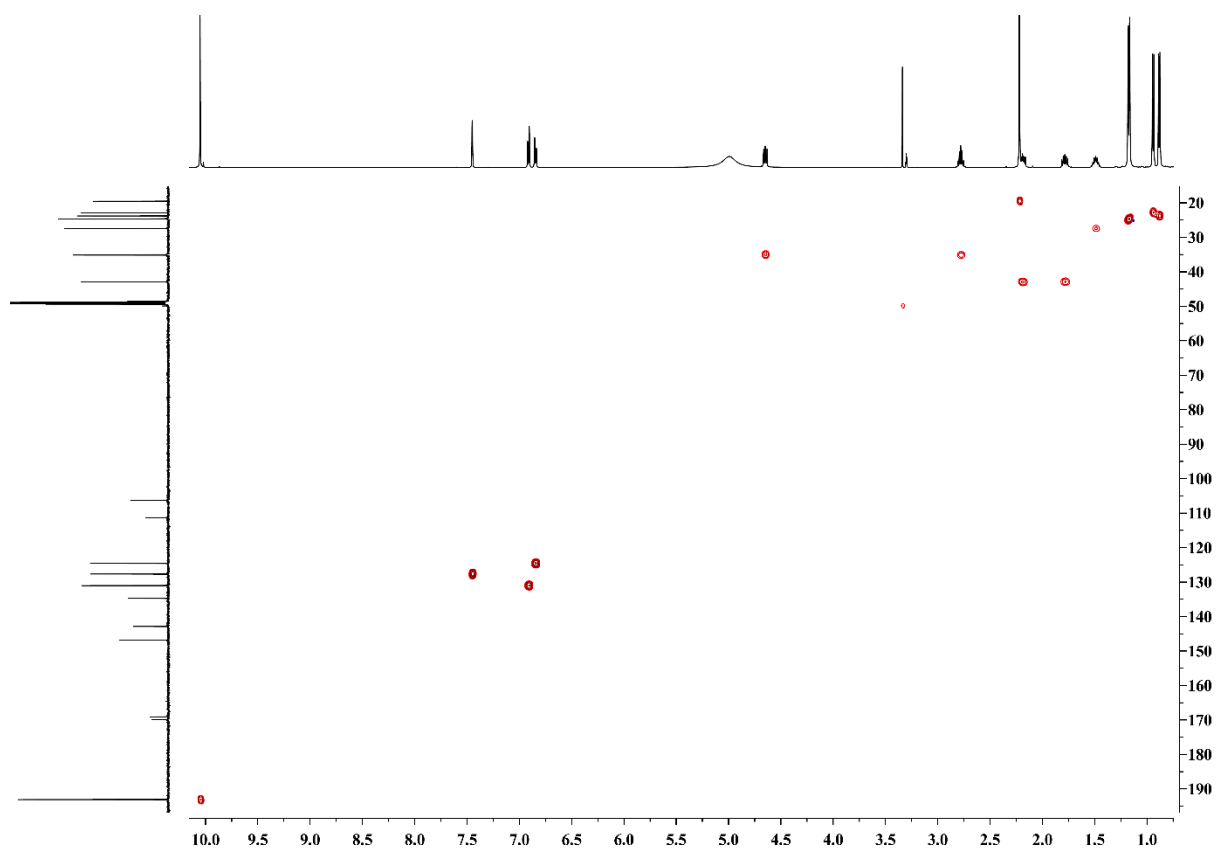

Figure S41 HMBC spectrum of **6**

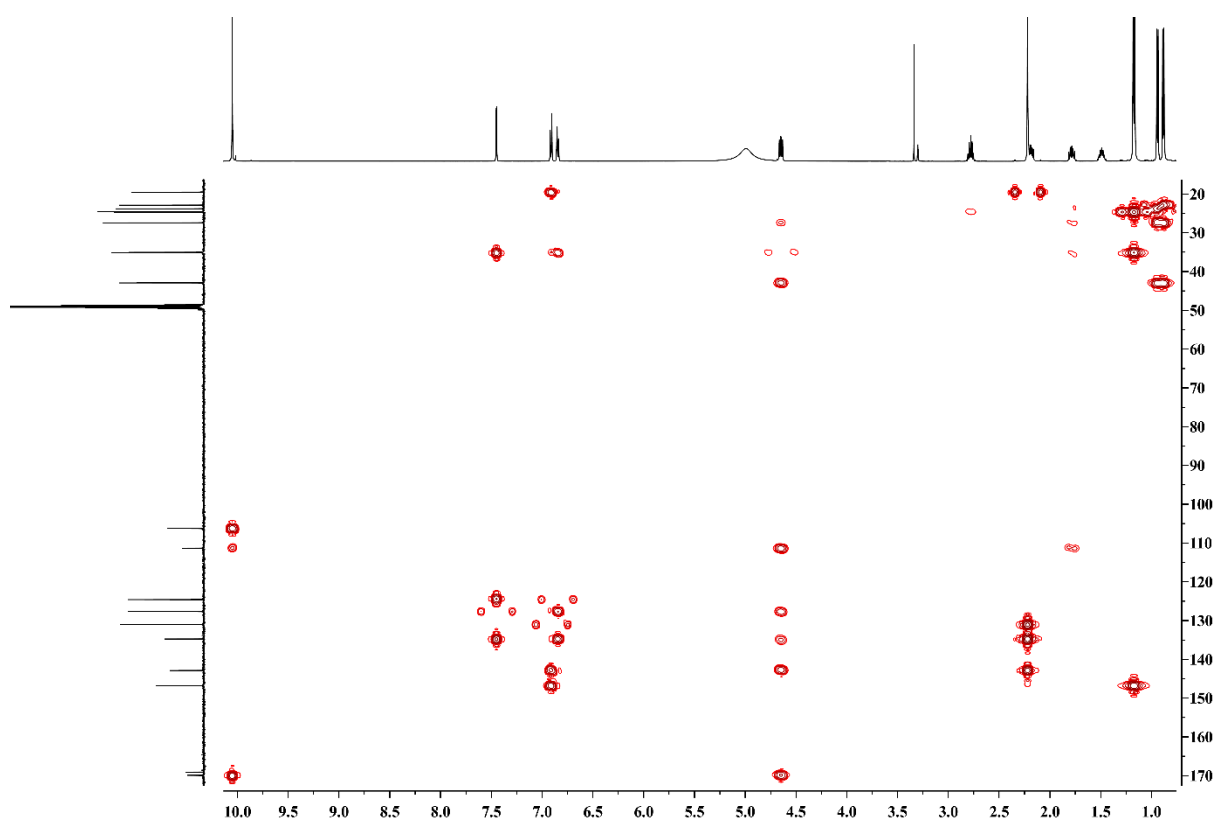

Figure S42  $^1\text{H}$ - $^1\text{H}$  COSY spectrum of **6**

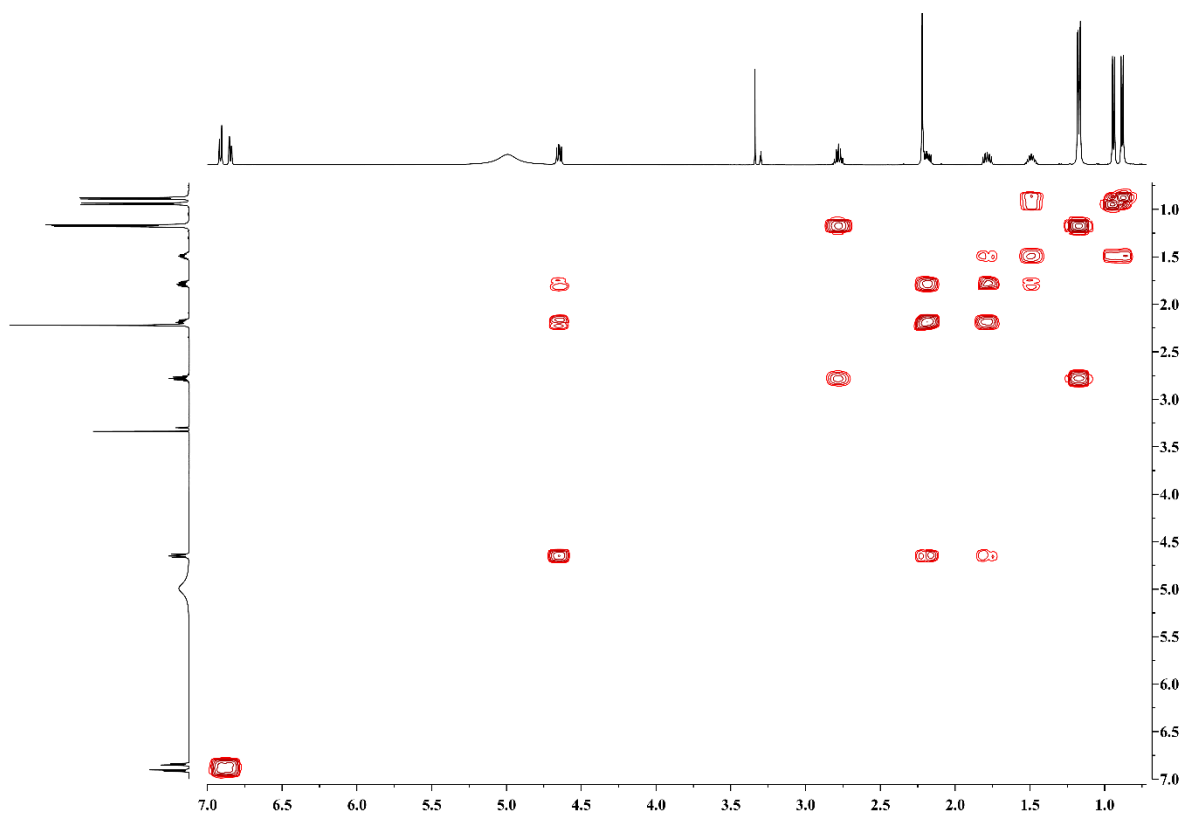

Figure S43 HRESIMS spectrum of **6**

User Spectra

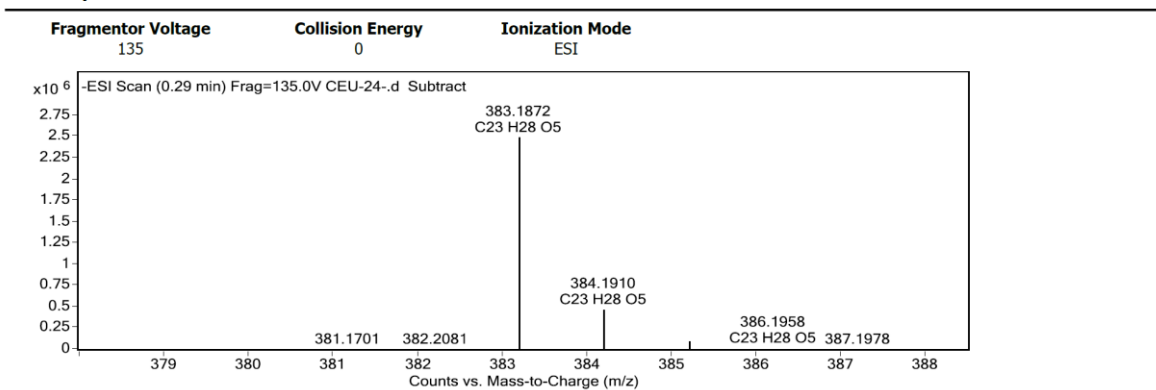

Peak List

| m/z       | z | Abund      | Formula    | Ion    |
|-----------|---|------------|------------|--------|
| 383.1872  | 1 | 2490940.25 | C23 H28 O5 | (M-H)- |
| 384.191   | 1 | 467384.69  | C23 H28 O5 | (M-H)- |
| 385.1931  | 1 | 99076.27   | C23 H28 O5 | (M-H)- |
| 386.1958  | 1 | 14013.77   | C23 H28 O5 | (M-H)- |
| 397.2023  | 1 | 17099.75   |            |        |
| 399.1816  | 1 | 18213.43   |            |        |
| 429.2284  | 1 | 16047.94   |            |        |
| 761.4058  | 1 | 17920.81   |            |        |
| 1033.9879 | 1 | 29045.38   |            |        |
| 1034.9917 | 1 | 7714.88    |            |        |

Formula Calculator Element Limits

| Element | Min | Max |
|---------|-----|-----|
| C       | 3   | 60  |
| H       | 0   | 120 |
| O       | 0   | 30  |

Formula Calculator Results

| Formula    | CalculatedMass | CalculatedMz | Mz       | Diff. (mDa) | Diff. (ppm) | DBE     |
|------------|----------------|--------------|----------|-------------|-------------|---------|
| C23 H28 O5 | 384.1937       | 383.1864     | 383.1872 | -0.80       | -2.09       | 10.0000 |

Figure S44  $^1\text{H}$  NMR spectrum of **7** (500 MHz,  $\text{CDCl}_3$ )

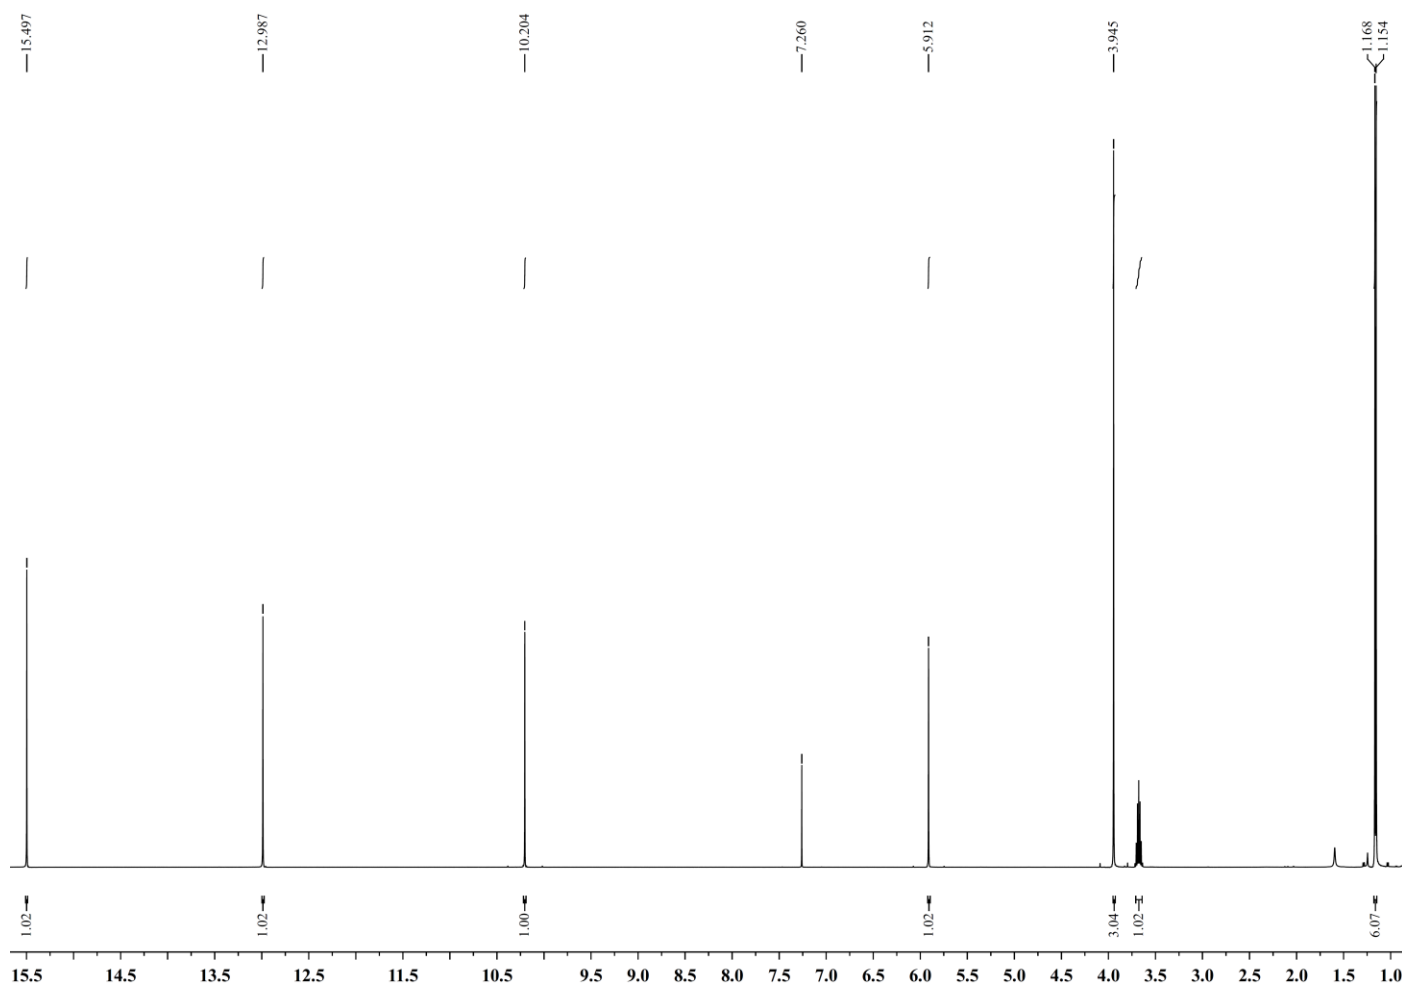

Figure S45  $^{13}\text{C}$  NMR spectrum of **7** (125 MHz,  $\text{CDCl}_3$ )

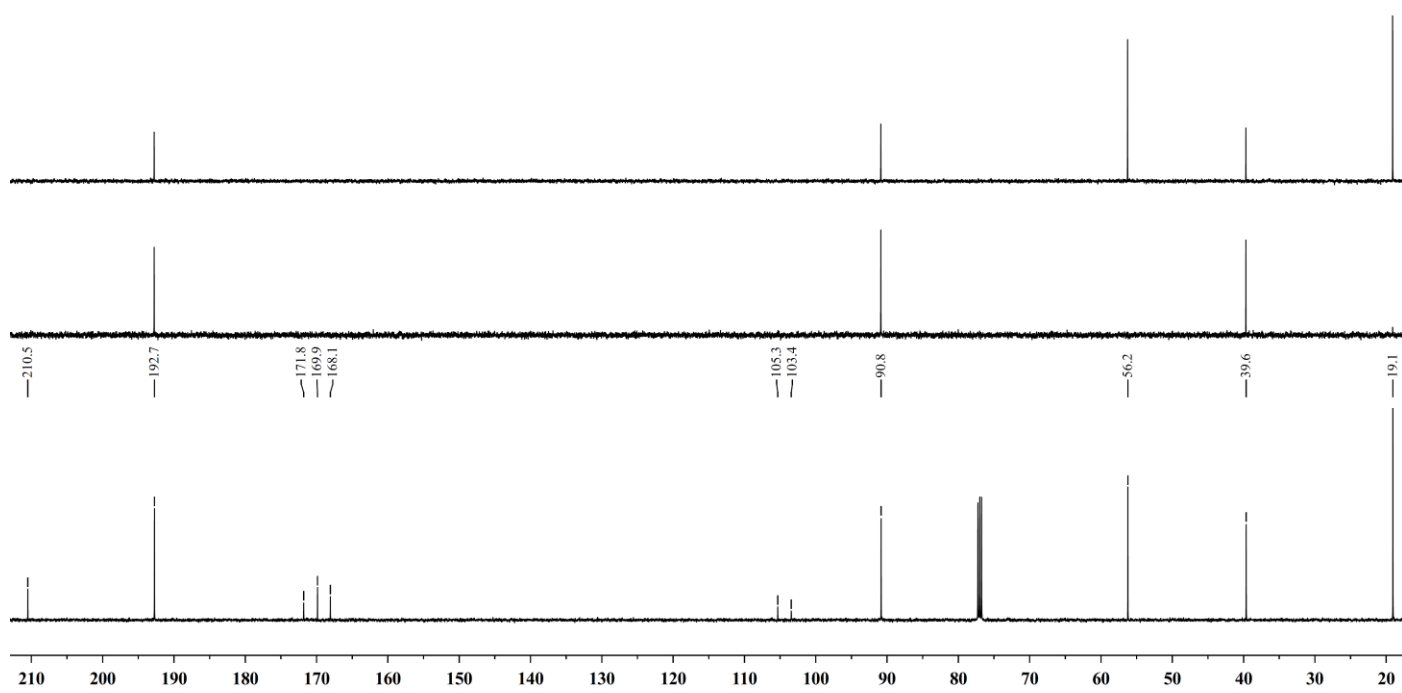

Figure S46 HSQC spectrum of 7

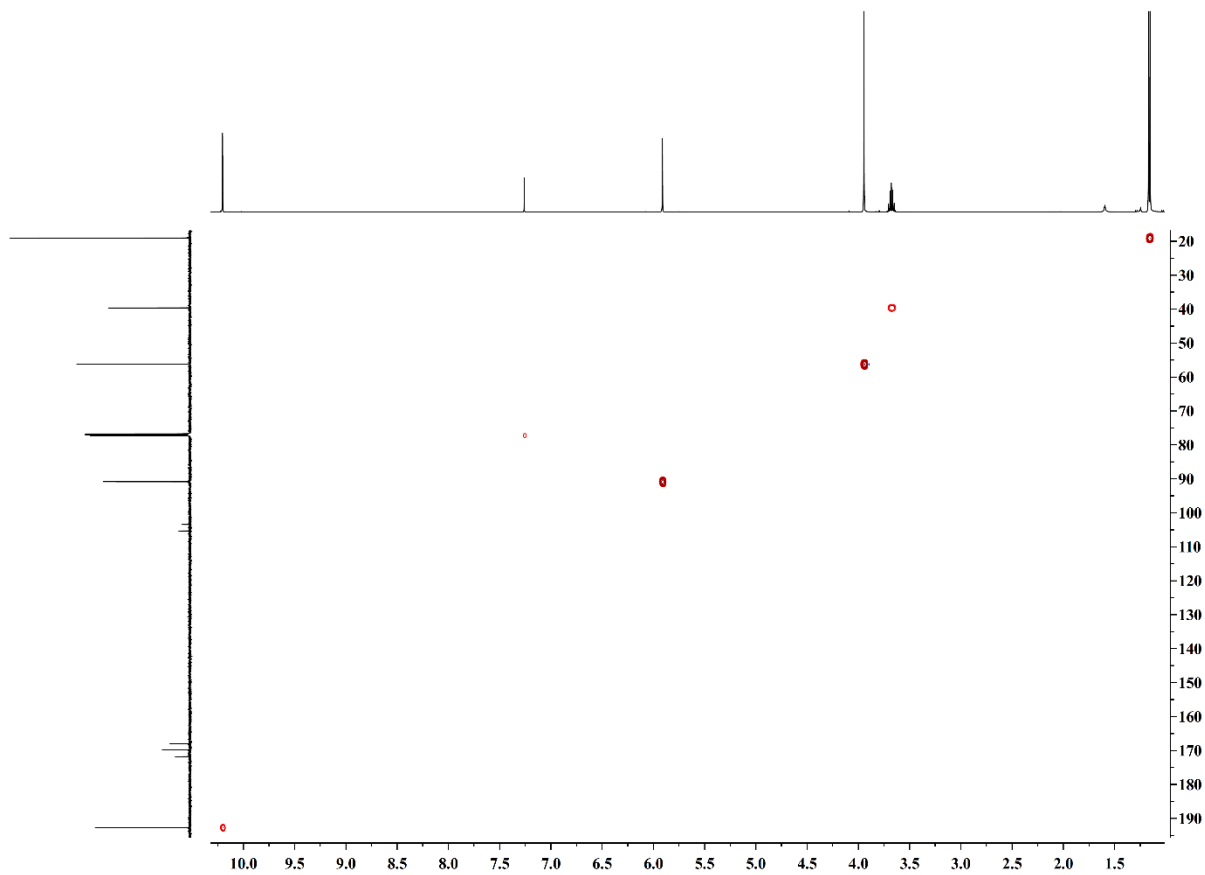

Figure S47 HMBC spectrum of 7

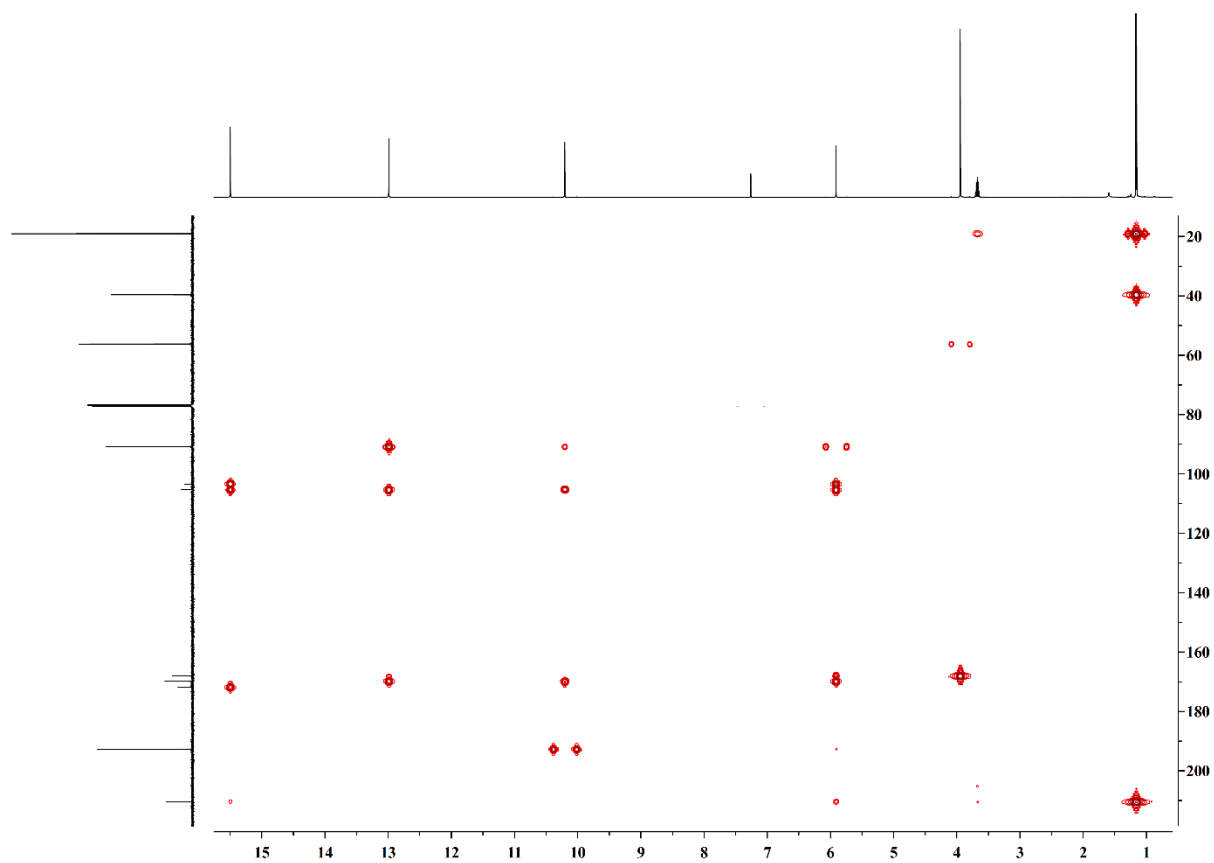

Figure S48  $^1\text{H}$ - $^1\text{H}$  COSY spectrum of 7

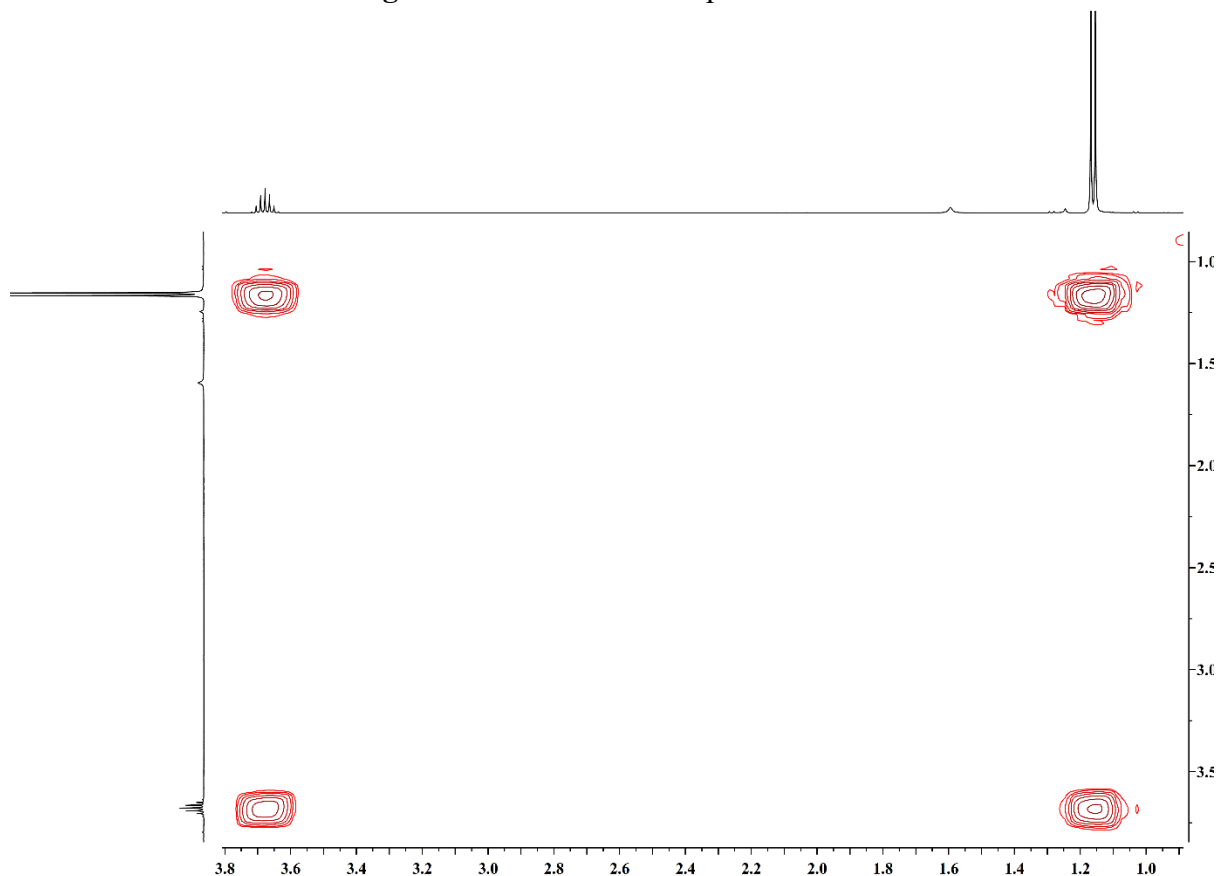

Figure S49 HRESIMS spectrum of 7

User Spectra

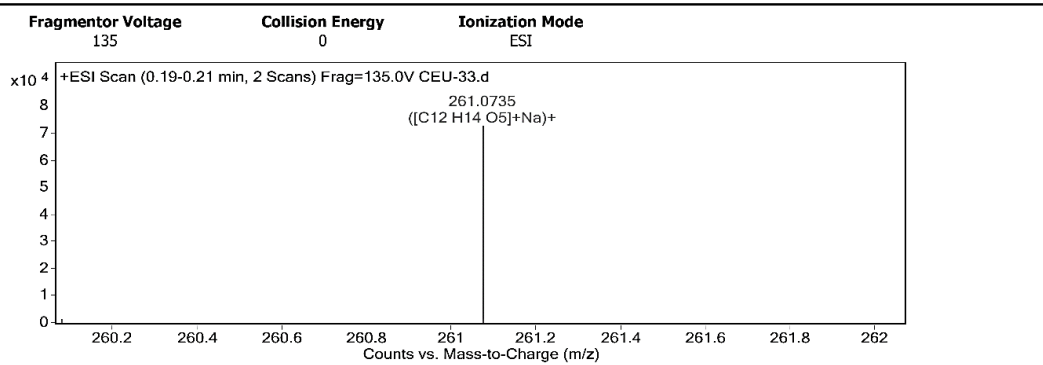

Peak List

| m/z      | z | Abund    | Formula    | Ion     |
|----------|---|----------|------------|---------|
| 258.0658 | 2 | 36301.57 |            |         |
| 261.0735 | 1 | 73119.33 | C12 H14 O5 | (M+Na)+ |
| 275.0896 | 1 | 34932.13 |            |         |
| 369.1196 | 2 | 30014.34 |            |         |
| 377.1088 | 2 | 75236.64 |            |         |
| 377.6105 | 2 | 30950.31 |            |         |
| 453.1687 | 2 | 28954.49 |            |         |
| 459.1694 | 2 | 33610.19 |            |         |

Formula Calculator Element Limits

| Element | Min | Max |
|---------|-----|-----|
| C       | 3   | 60  |
| H       | 0   | 120 |
| O       | 0   | 30  |

Formula Calculator Results

| Formula    | CalculatedMass | CalculatedMz | Mz       | Diff. (mDa) | Diff. (ppm) | DBE    |
|------------|----------------|--------------|----------|-------------|-------------|--------|
| C12 H14 O5 | 238.0841       | 261.0733     | 261.0735 | -0.20       | -0.77       | 6.0000 |

Figure S50  $^1\text{H}$  NMR spectrum of **8** (600 MHz, acetone- $d_6$ )

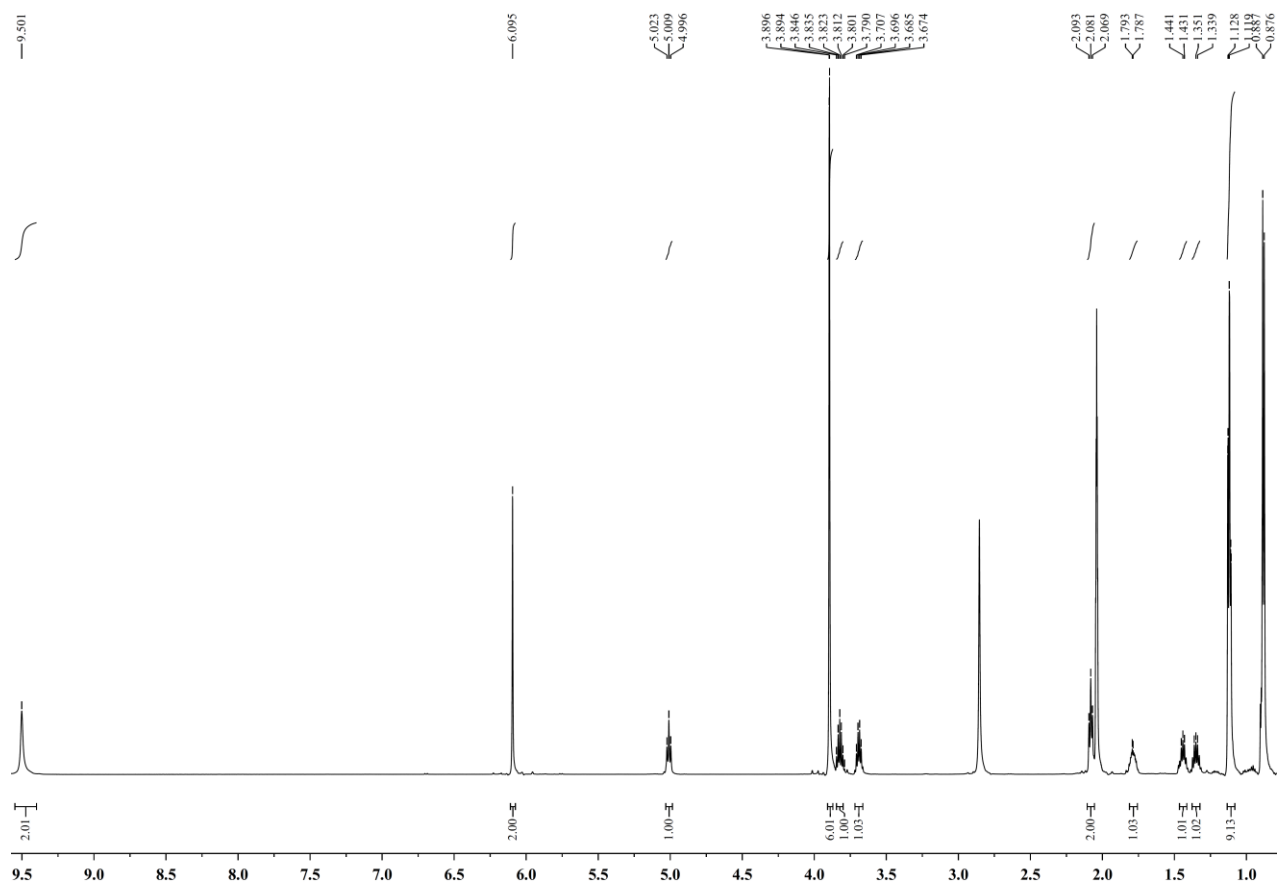

Figure S51  $^{13}\text{C}$  NMR spectrum of **8** (150 MHz, acetone- $d_6$ )

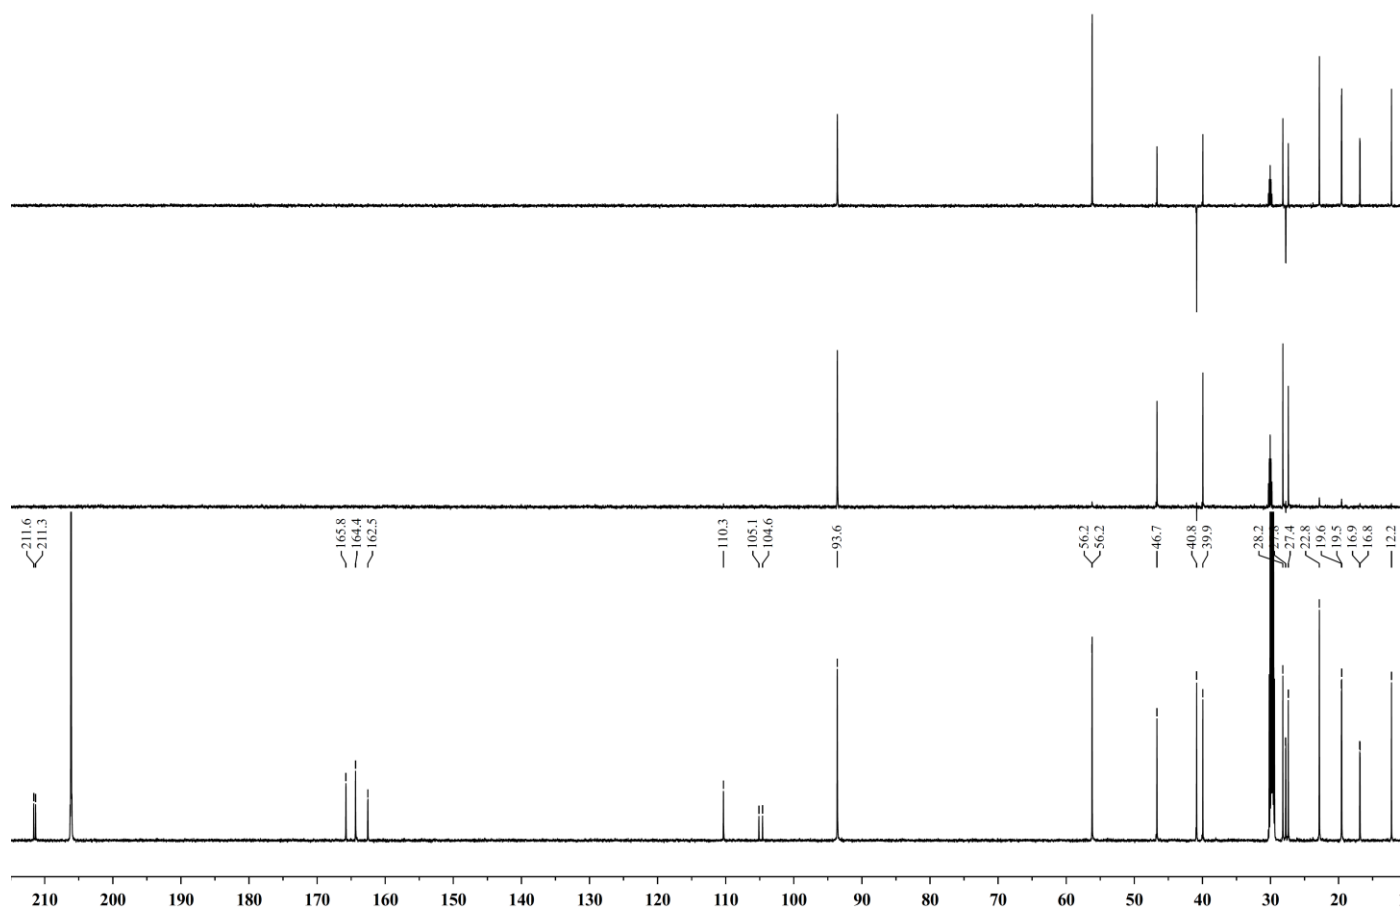

Figure S52 HSQC spectrum of **8**

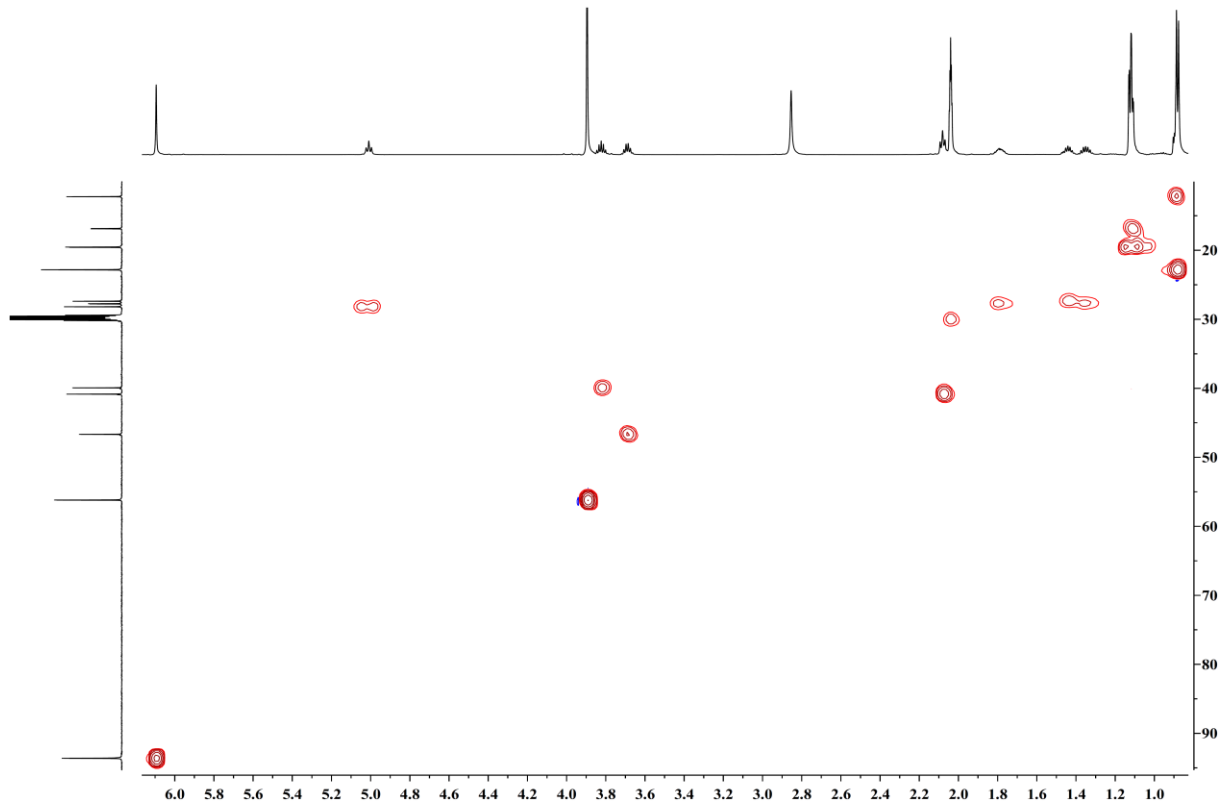

Figure S53 HMBC spectrum of **8**

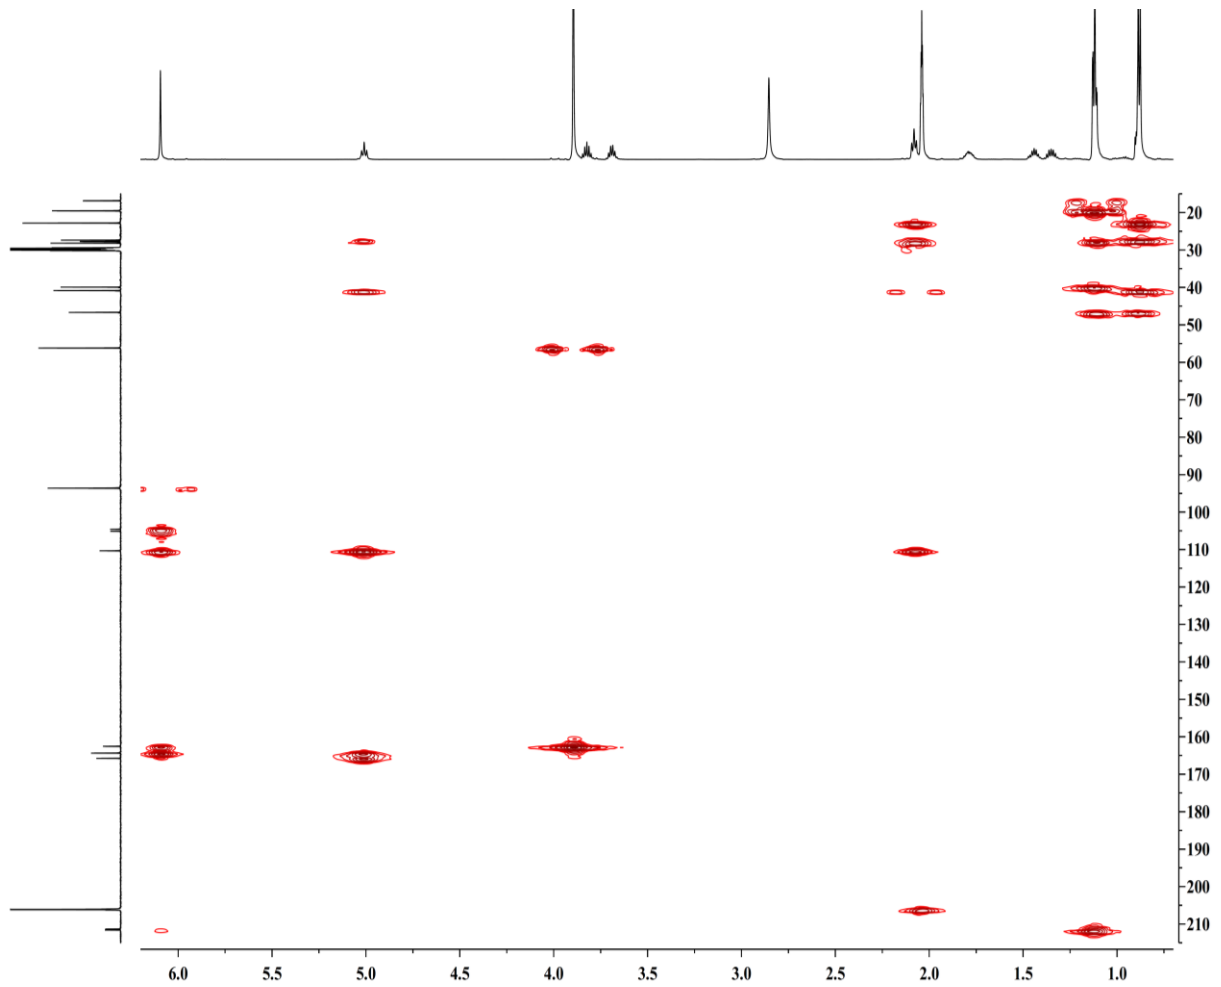

Figure S54  $^1\text{H}$ - $^1\text{H}$  COSY spectrum of **8**

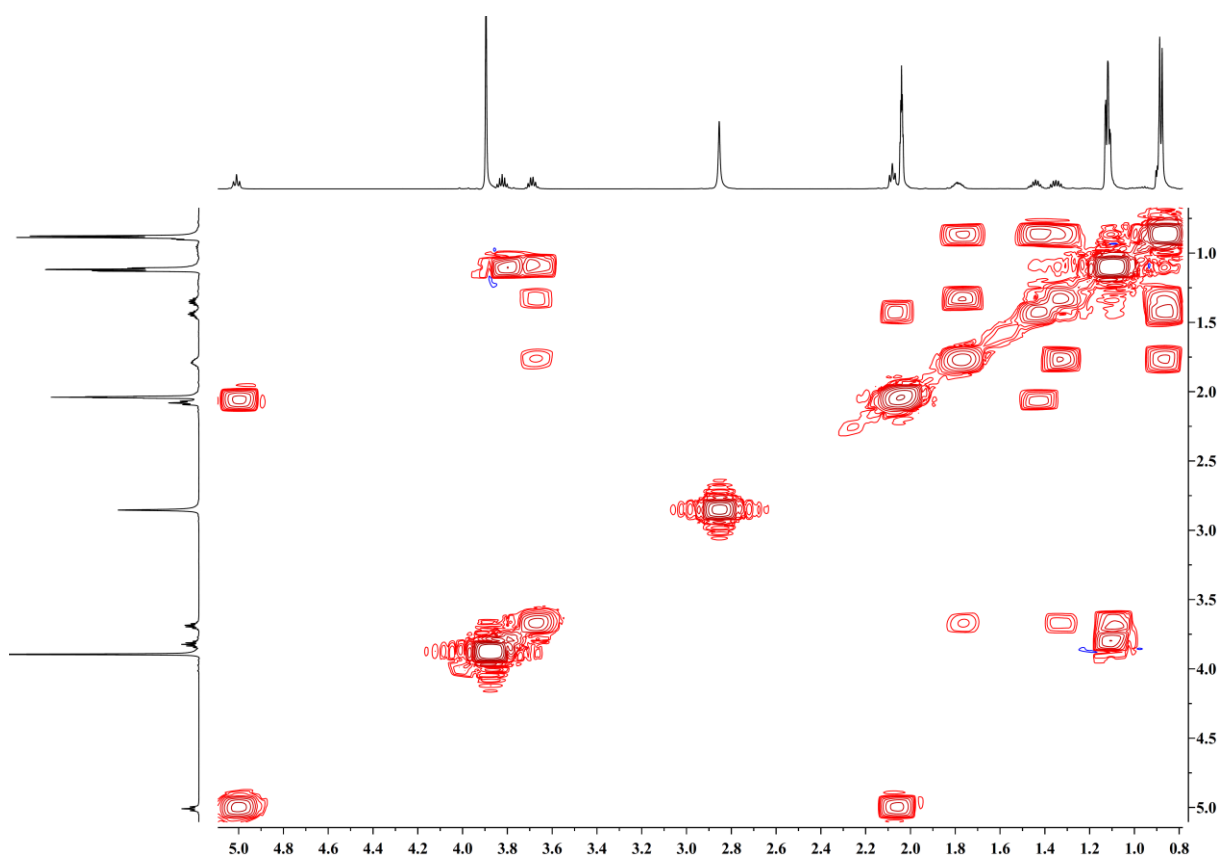

Figure S55 HRESIMS spectrum of **8**

User Spectra

Fragmentor Voltage: 135      Collision Energy: 0      Ionization Mode: ESI

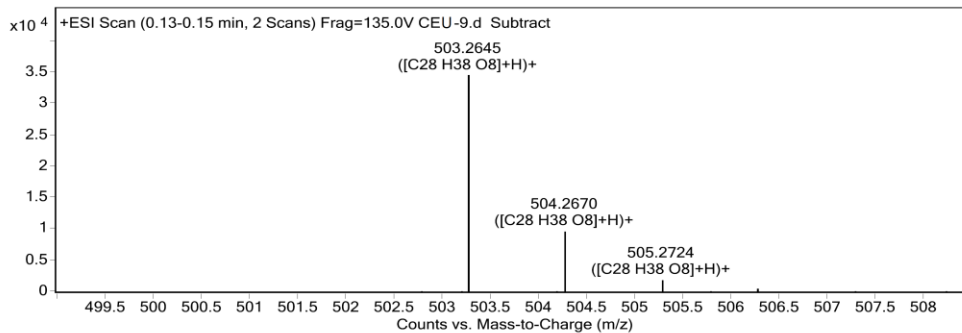

Peak List

| <i>m/z</i> | <i>z</i> | Abund    | Formula                                        | Ion                |
|------------|----------|----------|------------------------------------------------|--------------------|
| 279.1594   | 1        | 8301.38  |                                                |                    |
| 291.6231   | 2        | 4067.44  |                                                |                    |
| 293.1746   | 1        | 8516.72  |                                                |                    |
| 437.1949   | 1        | 2613.73  |                                                |                    |
| 453.1675   | 1        | 3175.68  |                                                |                    |
| 503.2645   | 1        | 34652.38 | C <sub>28</sub> H <sub>38</sub> O <sub>8</sub> | (M+H) <sup>+</sup> |
| 504.267    | 1        | 9774.65  | C <sub>28</sub> H <sub>38</sub> O <sub>8</sub> | (M+H) <sup>+</sup> |
| 525.2465   | 1        | 8340.53  |                                                |                    |
| 526.2508   | 1        | 2471.41  |                                                |                    |
| 1027.5058  | 1        | 4077.35  |                                                |                    |

Formula Calculator Element Limits

| Element | Min | Max |
|---------|-----|-----|
| C       | 3   | 120 |
| H       | 0   | 240 |
| O       | 0   | 30  |

Formula Calculator Results

| Formula                                        | CalculatedMass | CalculatedMz | Mz       | Diff. (mDa) | Diff. (ppm) | DBE     |
|------------------------------------------------|----------------|--------------|----------|-------------|-------------|---------|
| C <sub>28</sub> H <sub>38</sub> O <sub>8</sub> | 502.2567       | 503.2639     | 503.2645 | -0.60       | -1.19       | 10.0000 |



Figure S56  $^1\text{H}$  NMR spectrum of **9** (600 MHz,  $\text{CDCl}_3$ )

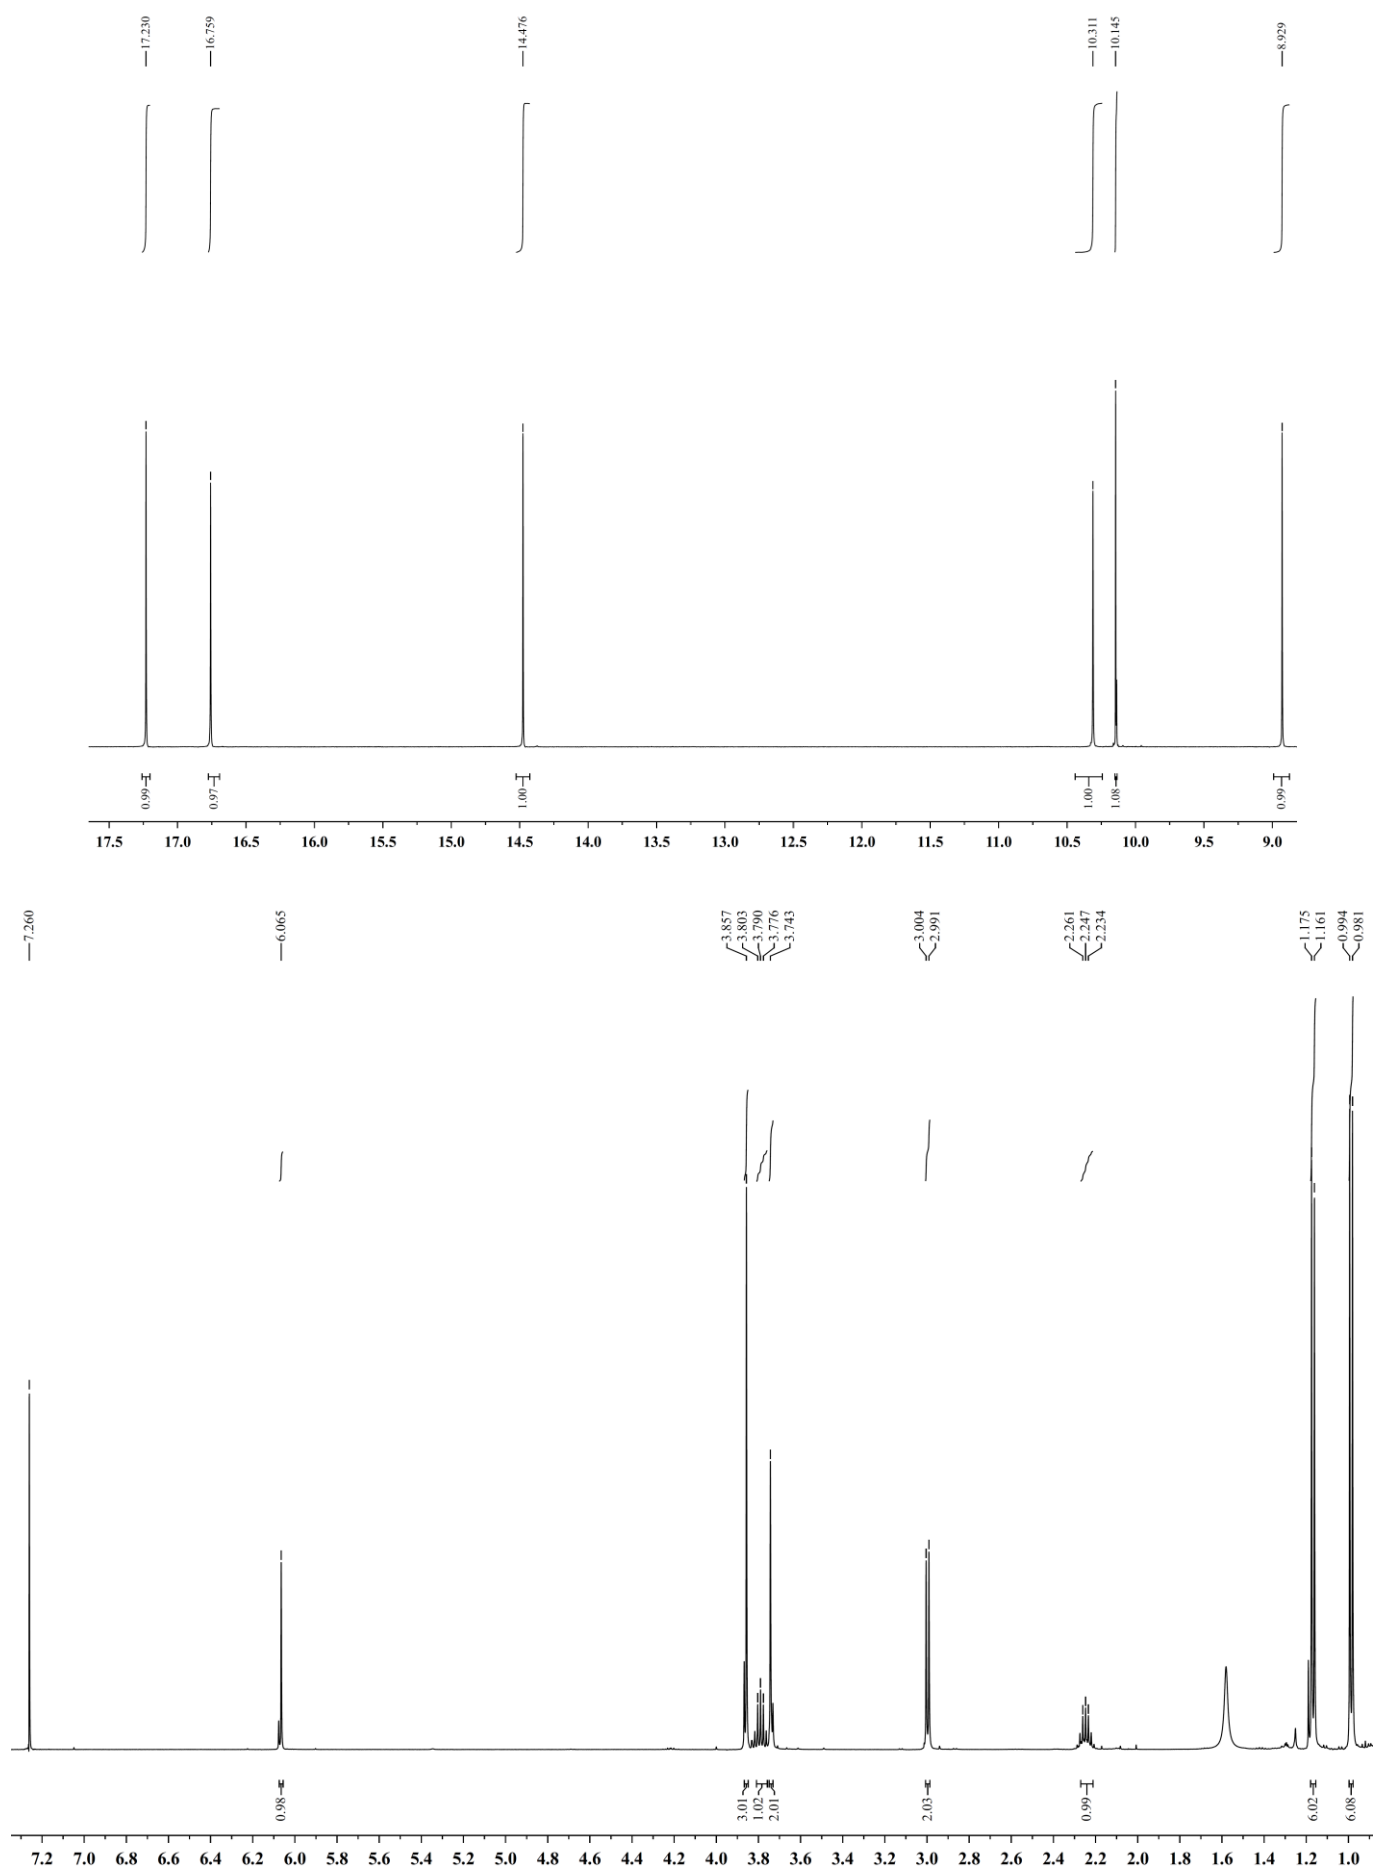

Figure S57  $^{13}\text{C}$  NMR spectrum of **9** (150 MHz,  $\text{CDCl}_3$ )

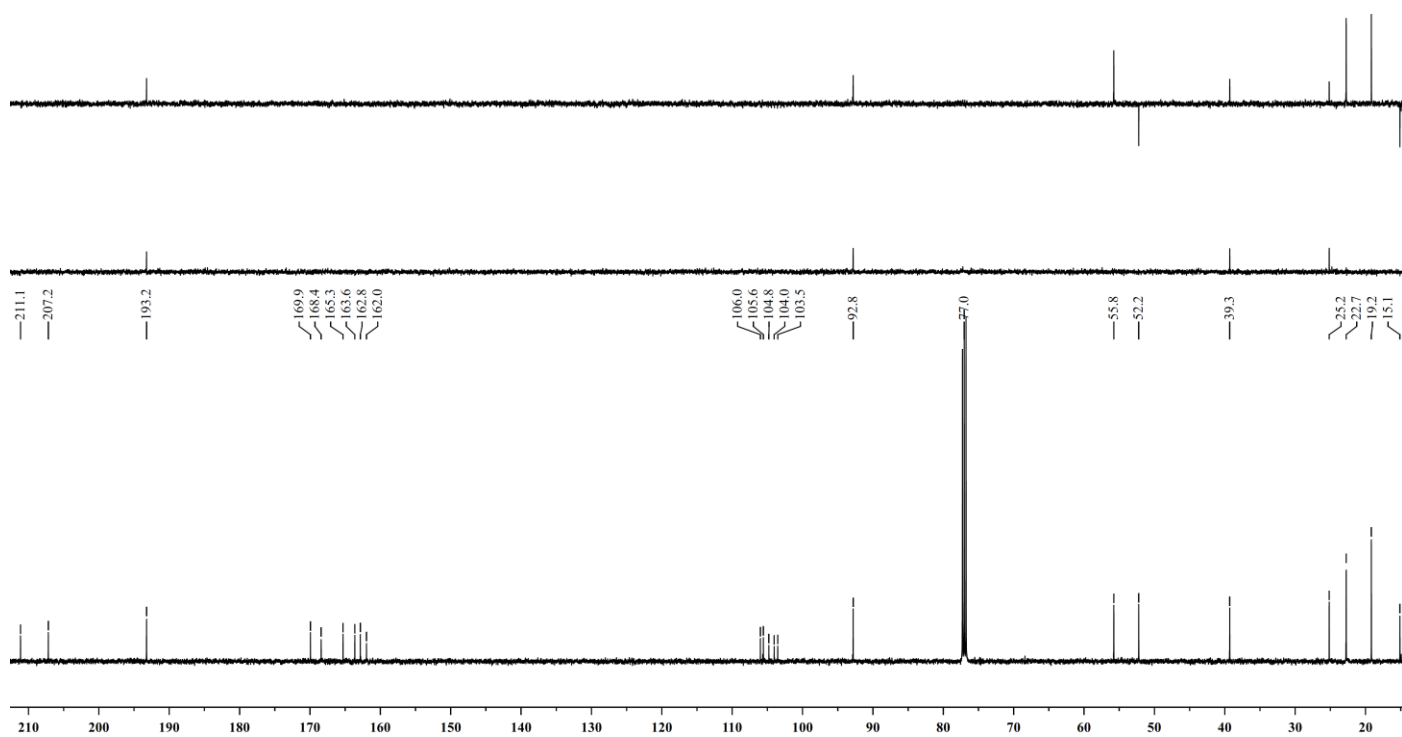

Figure S58 HSQC spectrum of **9**

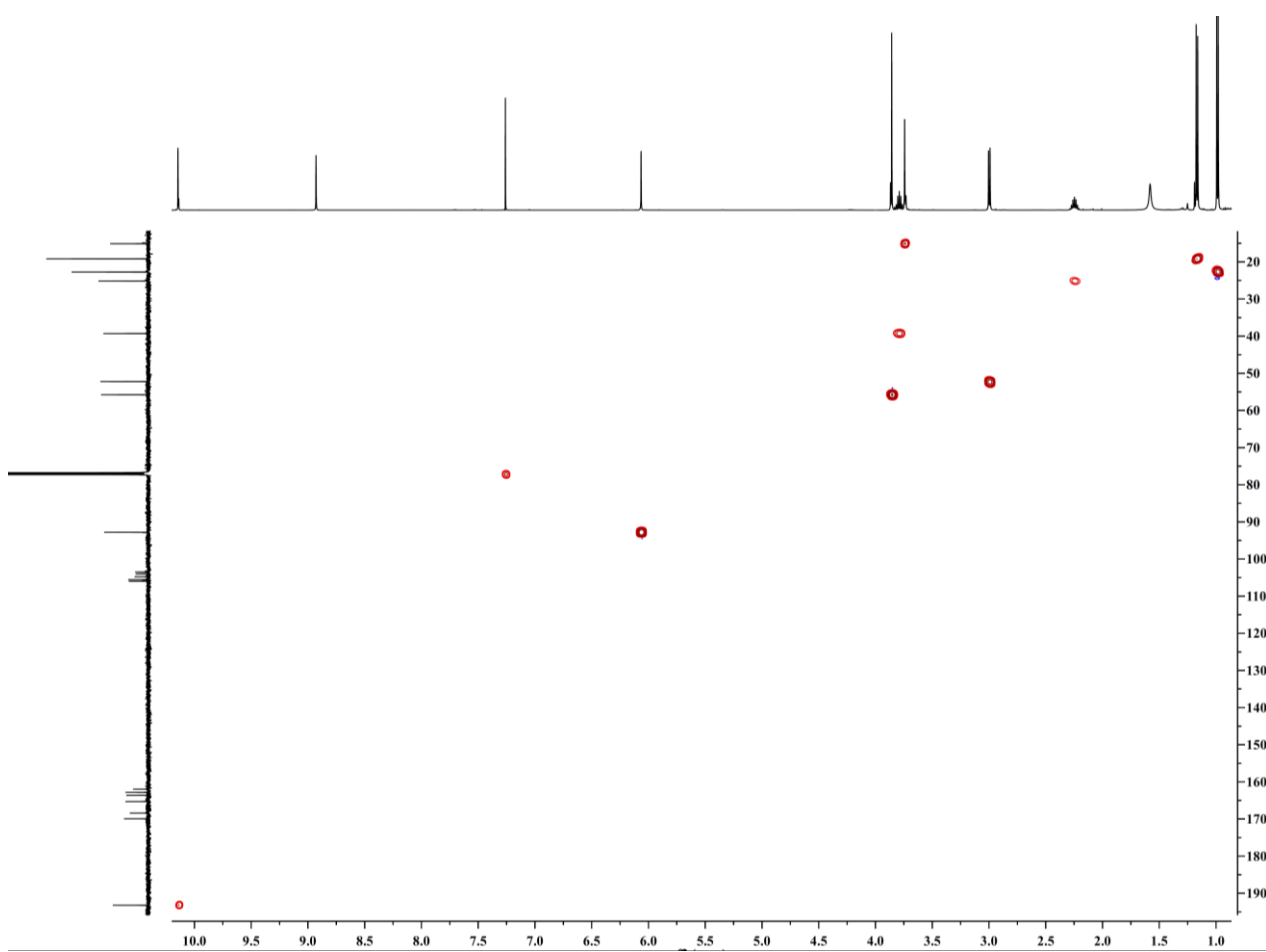

Figure S59 HMBC spectrum of **9**

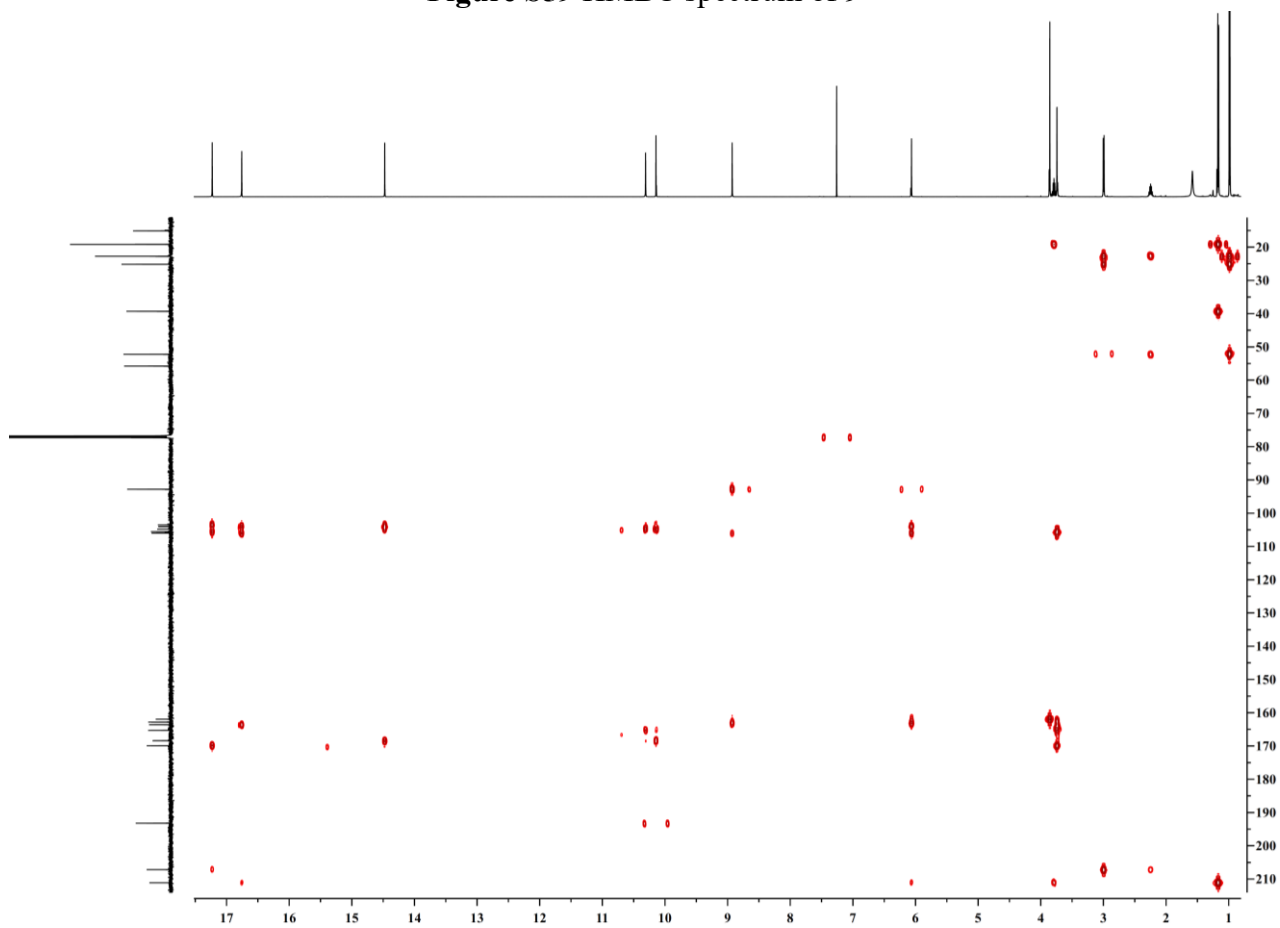

Figure S60  $^1\text{H}$ - $^1\text{H}$  COSY spectrum of **9**

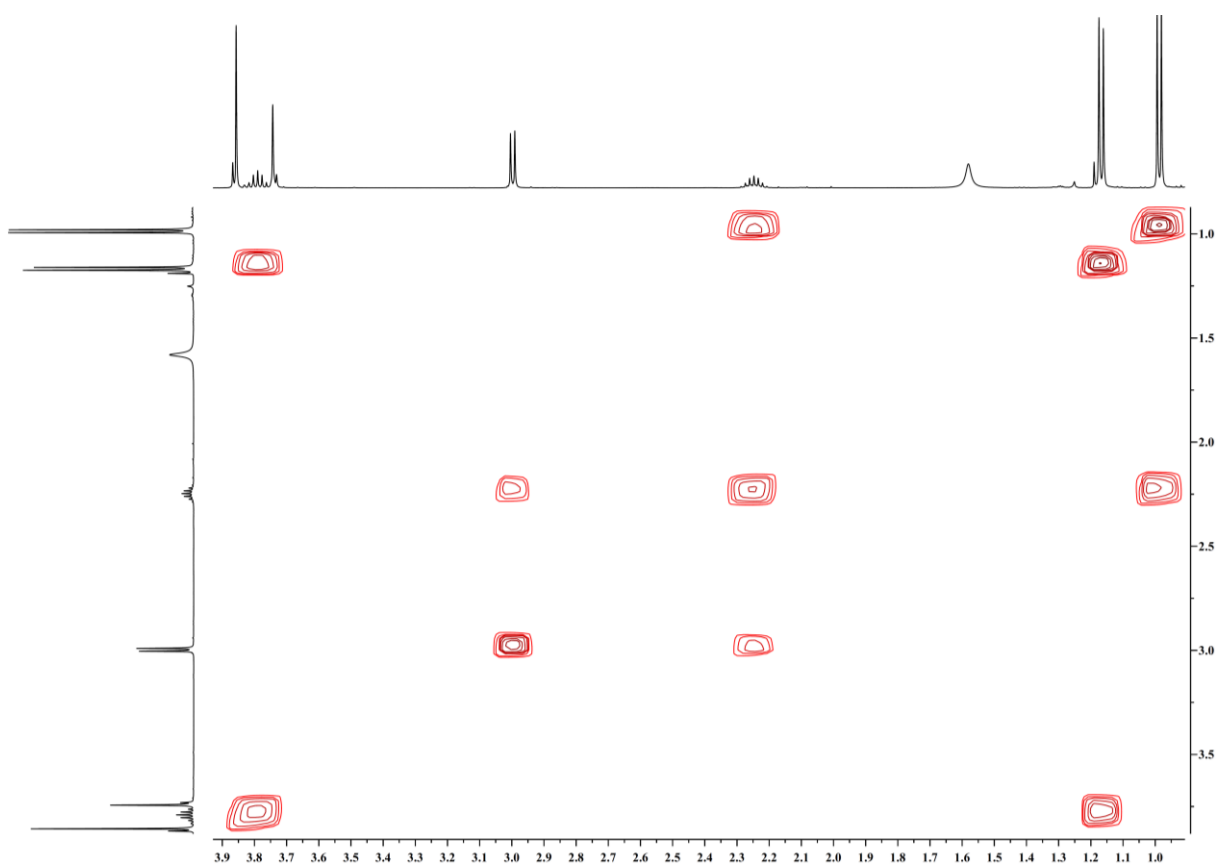

Figure S61 HRESIMS spectrum of **9**

User Spectra

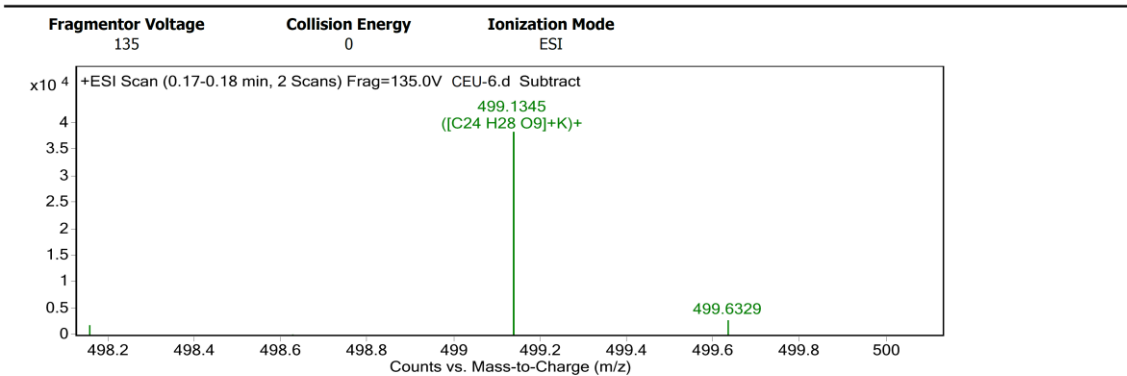

Peak List

| m/z      | z | Abund    | Formula                                        | Ion                |
|----------|---|----------|------------------------------------------------|--------------------|
| 299.1114 | 1 | 56808.45 |                                                |                    |
| 301.1416 | 1 | 35021.72 |                                                |                    |
| 315.0855 | 1 | 90959.04 |                                                |                    |
| 317.1157 | 1 | 68790.2  |                                                |                    |
| 499.1345 | 1 | 38546.86 | C <sub>24</sub> H <sub>28</sub> O <sub>9</sub> | (M+K) <sup>+</sup> |
| 540.1553 | 1 | 19467.76 |                                                |                    |
| 575.233  | 1 | 21283.24 |                                                |                    |
| 658.433  | 1 | 26975.96 |                                                |                    |

Formula Calculator Element Limits

| Element | Min | Max |
|---------|-----|-----|
| C       | 3   | 60  |
| H       | 0   | 120 |
| O       | 0   | 10  |

Formula Calculator Results

| Formula                                        | CalculatedMass | CalculatedMz | Mz       | Diff. (mDa) | Diff. (ppm) | DBE     |
|------------------------------------------------|----------------|--------------|----------|-------------|-------------|---------|
| C <sub>24</sub> H <sub>28</sub> O <sub>9</sub> | 460.1733       | 499.1365     | 499.1345 | 2.00        | 4.01        | 11.0000 |

Figure S62 <sup>1</sup>H NMR (600 MHz, pyridine-*d*<sub>5</sub>) spectrum of **10** and **11**

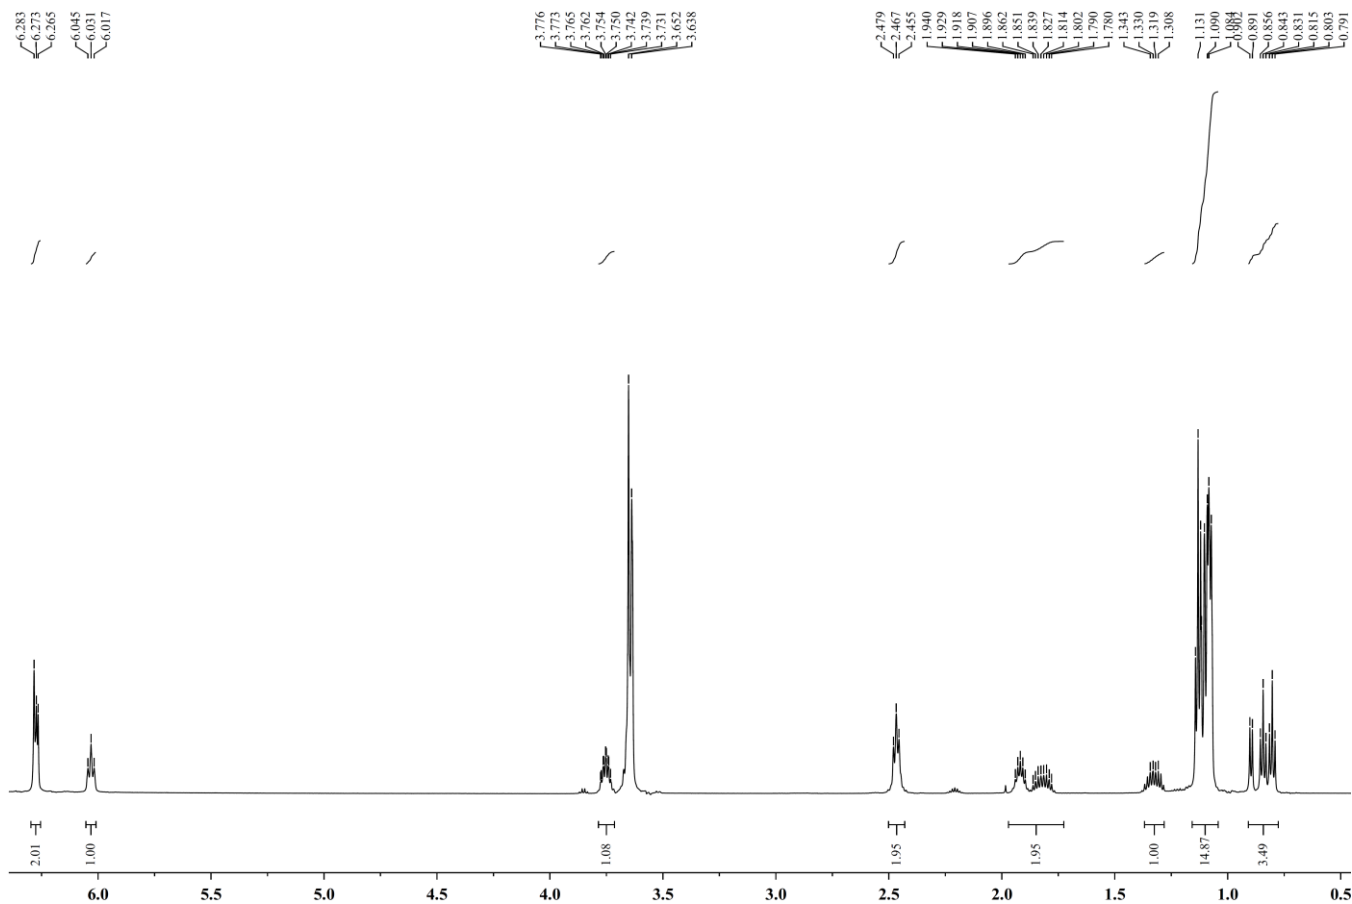

**Figure S63**  $^{13}\text{C}$  NMR (150 MHz, pyridine- $d_5$ ) spectrum of **10** and **11**

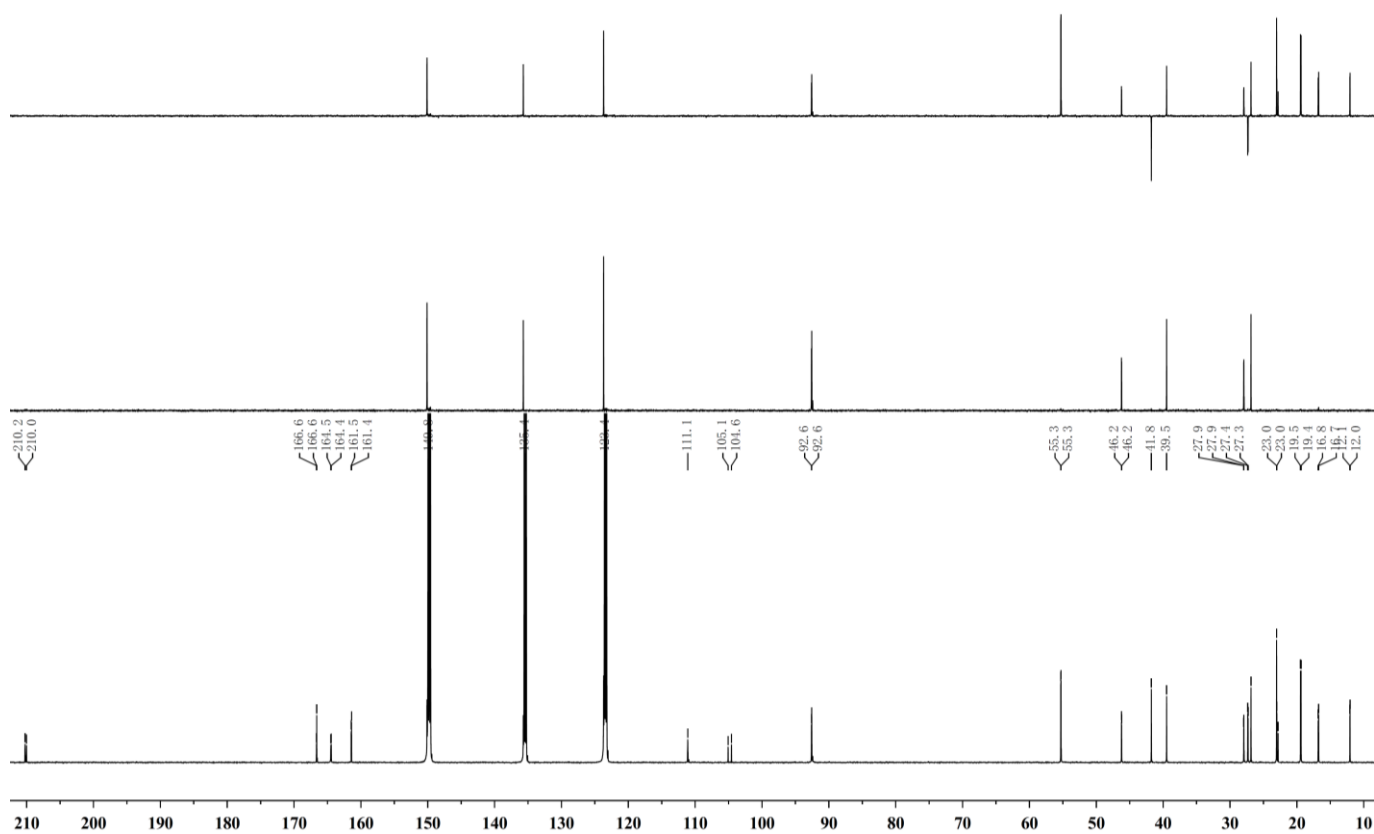

**Figure S64** HSQC spectrum of the mixture **10** and **11**

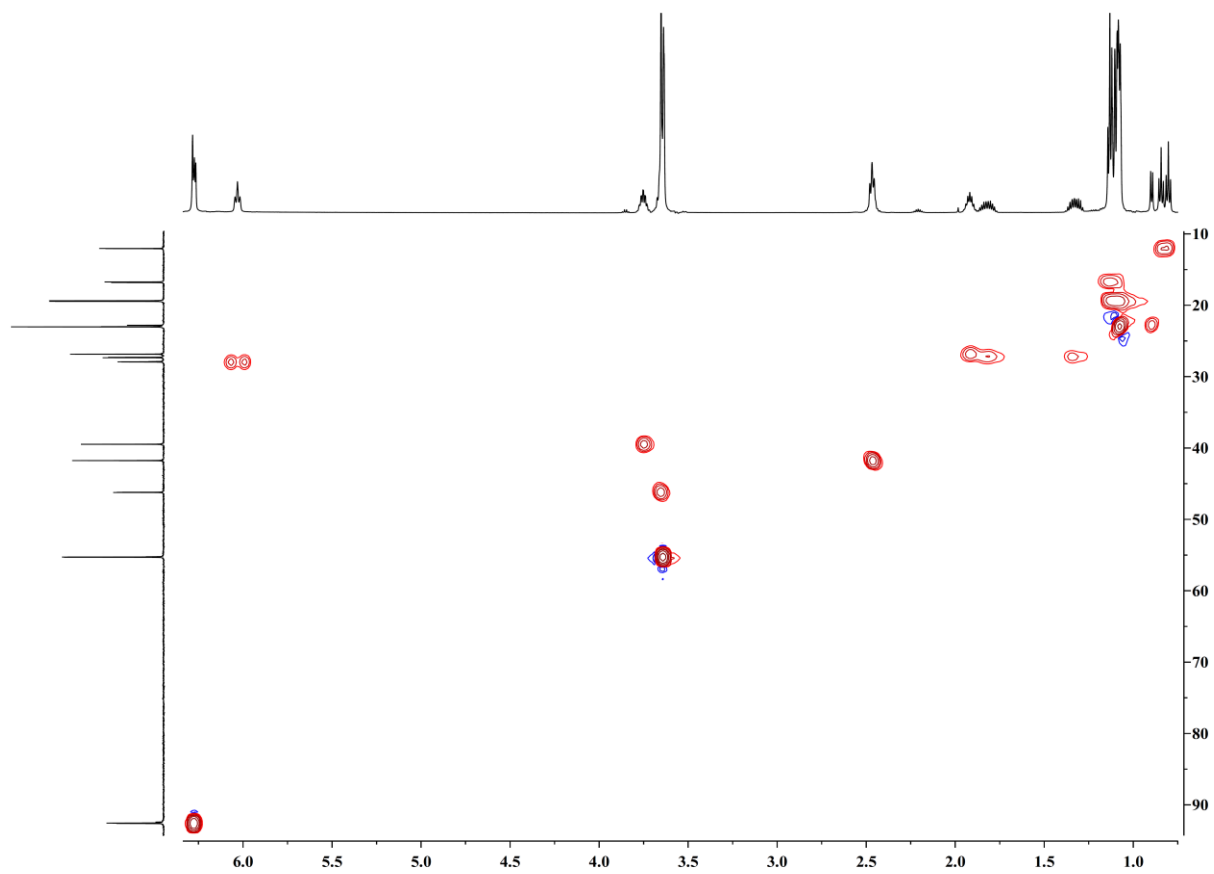

Figure S65 HMBC spectrum of the mixture **10** and **11**

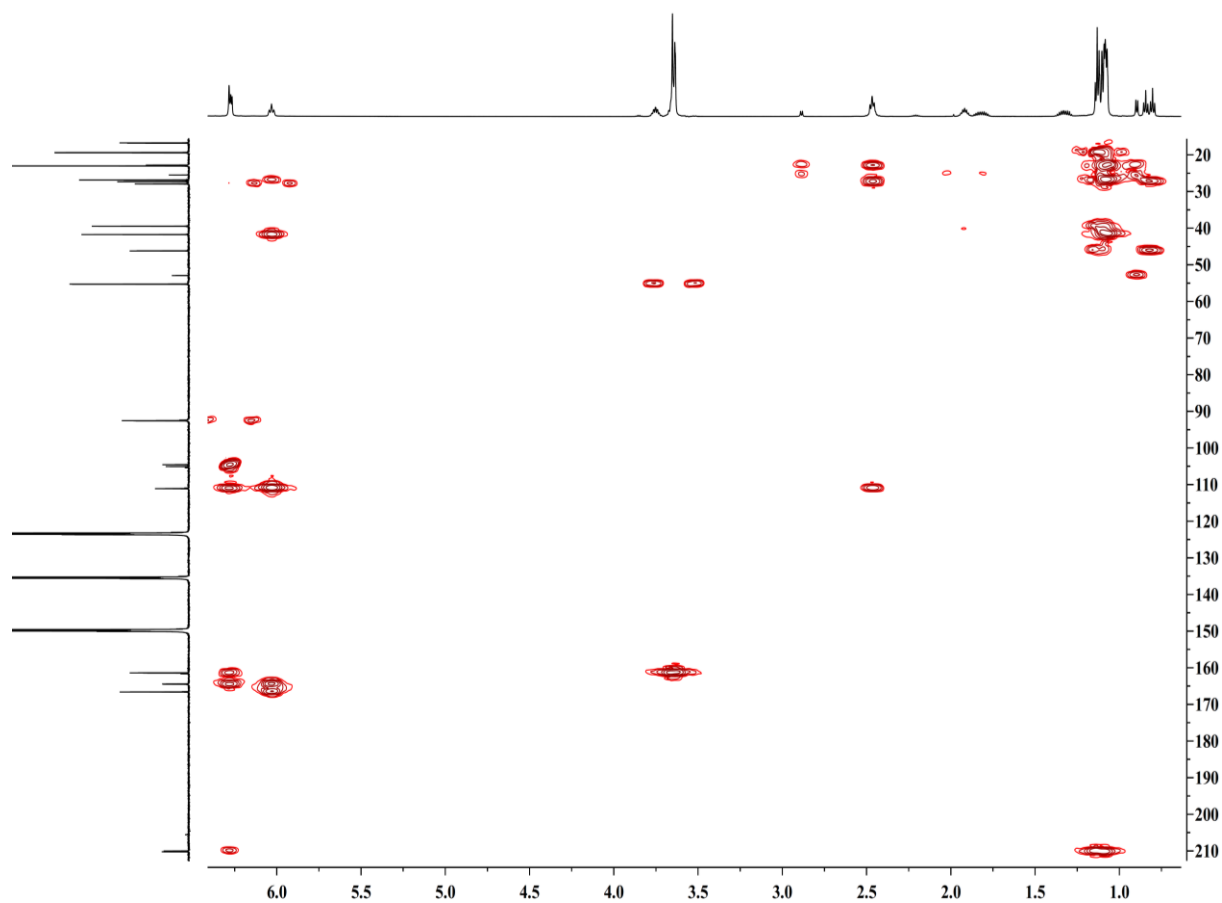

Figure S66  $^1\text{H}$ - $^1\text{H}$  COSY spectrum of the mixture **10** and **11**

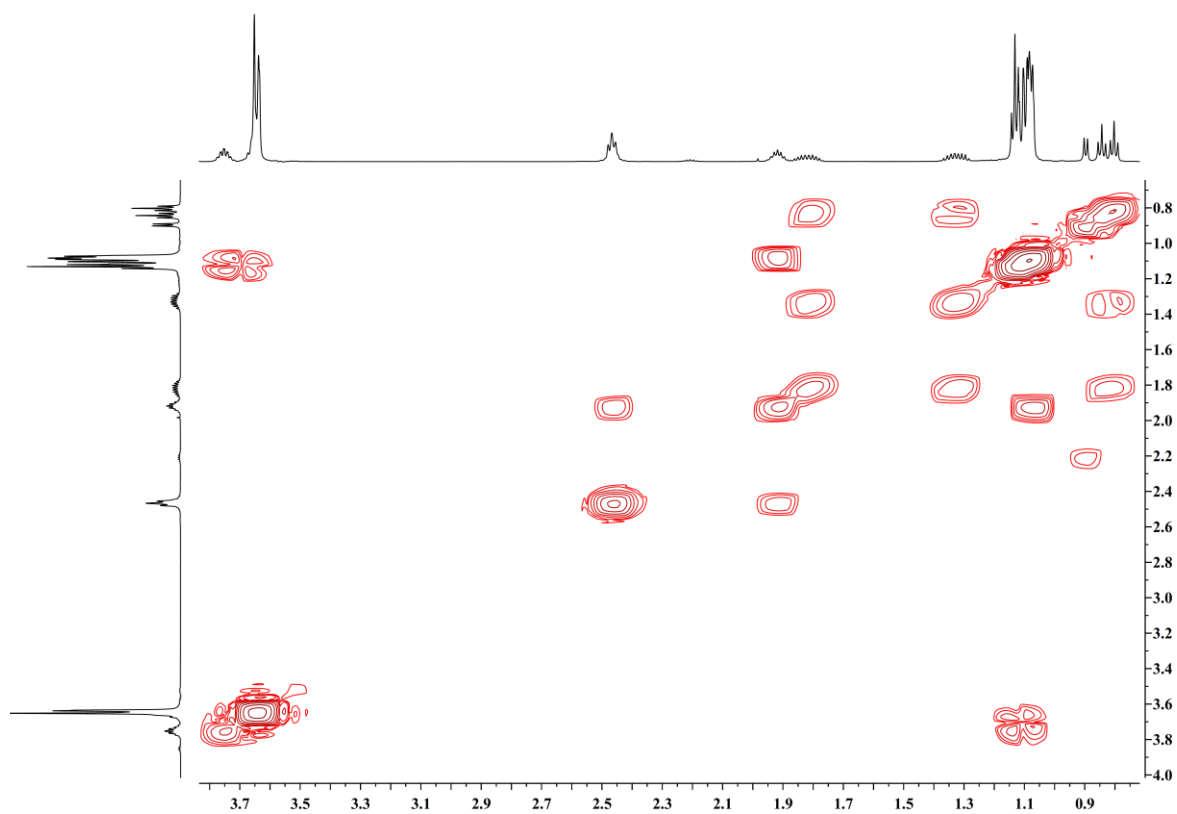

Figure S67 HRESIMS spectrum of the mixture 10 and 11

User Spectra

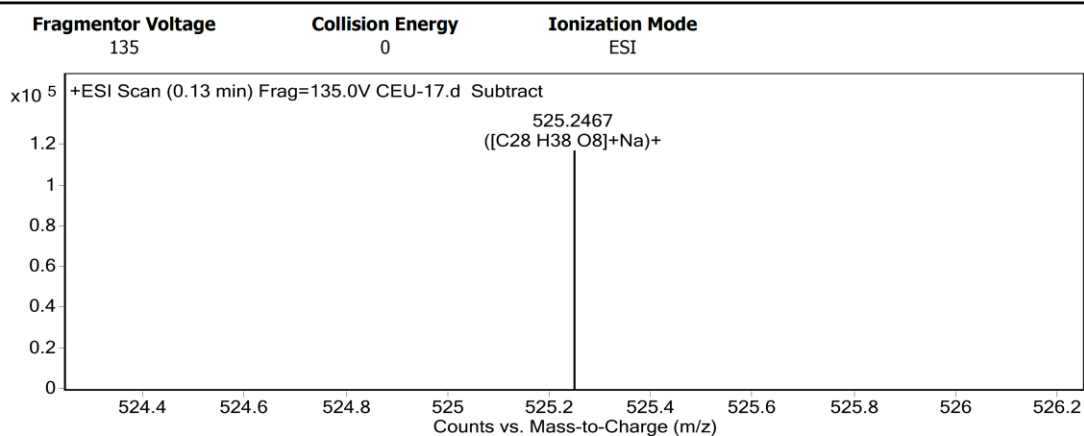

Peak List

| m/z       | z | Abund     | Formula    | Ion     |
|-----------|---|-----------|------------|---------|
| 279.1591  | 1 | 22184.19  |            |         |
| 293.1745  | 1 | 22731.09  |            |         |
| 503.2642  | 1 | 46258.4   |            |         |
| 525.2467  | 1 | 117672.32 | C28 H38 O8 | (M+Na)+ |
| 526.2497  | 1 | 33675.64  | C28 H38 O8 | (M+Na)+ |
| 541.2205  | 1 | 54502.98  |            |         |
| 542.2235  | 1 | 15409.3   |            |         |
| 1027.5037 | 1 | 23117.11  |            |         |

Formula Calculator Element Limits

| Element | Min | Max |
|---------|-----|-----|
| C       | 3   | 60  |
| H       | 0   | 120 |
| O       | 0   | 30  |

Formula Calculator Results

| Formula    | CalculatedMass | CalculatedMz | Mz       | Diff. (mDa) | Diff. (ppm) | DBE     |
|------------|----------------|--------------|----------|-------------|-------------|---------|
| C28 H38 O8 | 502.2567       | 525.2459     | 525.2467 | -0.80       | -1.52       | 10.0000 |

## ECD computational data of 2–6 and 9

Computational data of (1*R*,4*R*,6*R*,9'*R*)-2

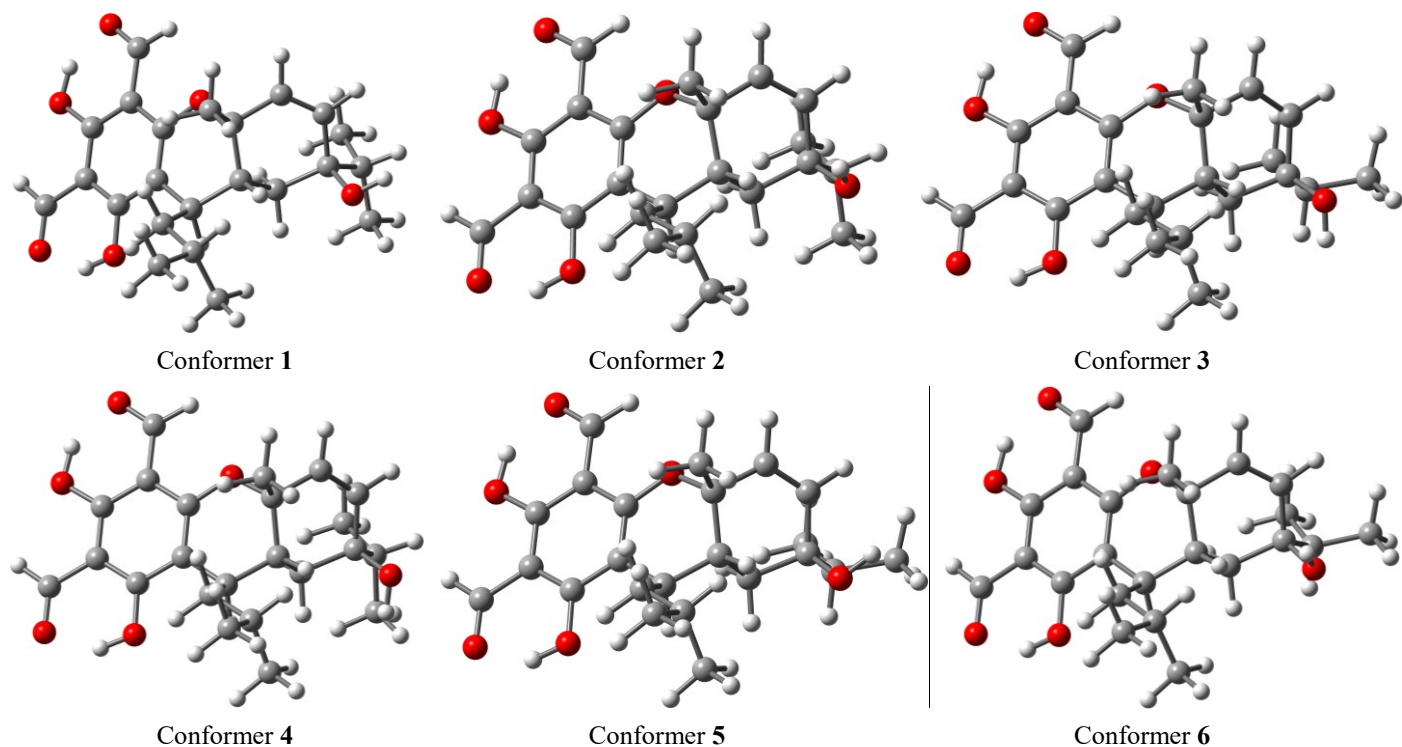

| No.         | Distribution (%) | Relative Energy (kcal/mol) | No.         | Distribution (%) | Relative Energy (kcal/mol) |
|-------------|------------------|----------------------------|-------------|------------------|----------------------------|
| Conformer 1 | 33.1633          | 0.0000                     | Conformer 4 | 10.7445          | 0.6678                     |
| Conformer 2 | 16.6238          | 0.4092                     | Conformer 5 | 8.6848           | 0.7939                     |
| Conformer 3 | 12.4021          | 0.5828                     | Conformer 6 | 7.0969           | 0.9135                     |

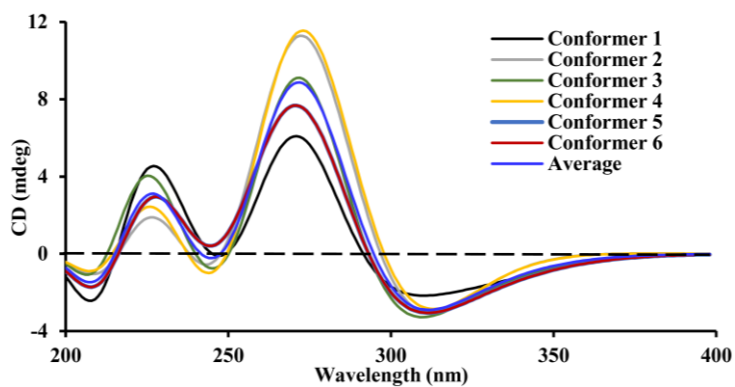

Computational data of (1*S*,2*R*,6*R*,9'*R*)-3

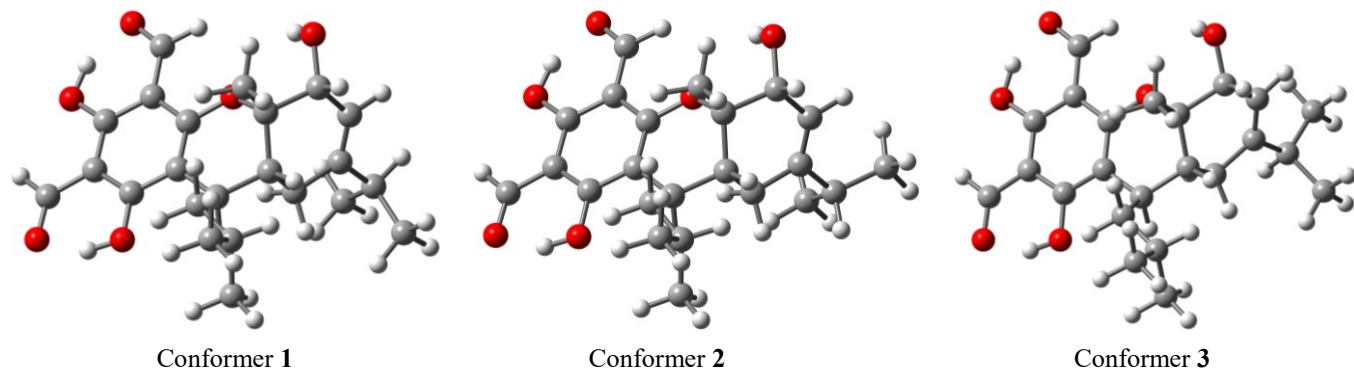



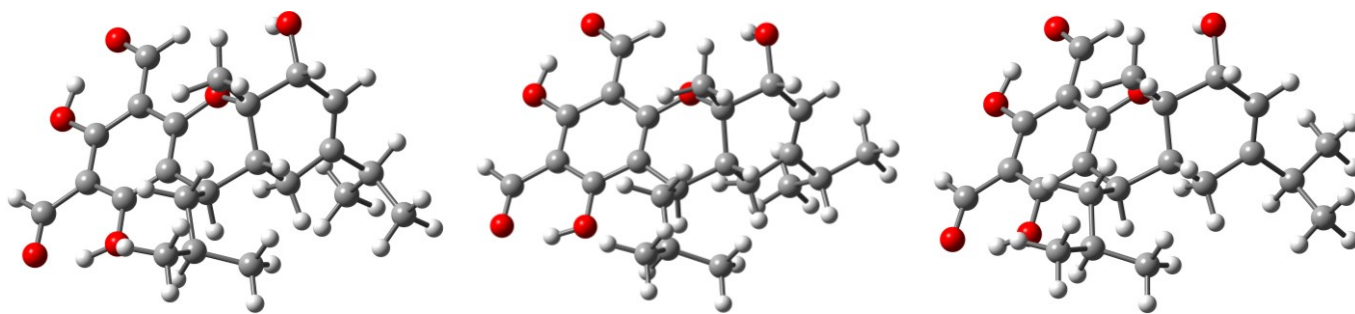

Conformer 4

Conformer 5

Conformer 6

| No.         | Distribution (%) | Relative Energy (kcal/mol) | No.         | Distribution (%) | Relative Energy (kcal/mol) |
|-------------|------------------|----------------------------|-------------|------------------|----------------------------|
| Conformer 1 | 34.1493          | 0.0000                     | Conformer 4 | 12.2541          | 0.6072                     |
| Conformer 2 | 20.3125          | 0.3125                     | Conformer 5 | 7.2280           | 0.9200                     |
| Conformer 3 | 17.4926          | 0.3964                     | Conformer 6 | 6.2769           | 1.0036                     |

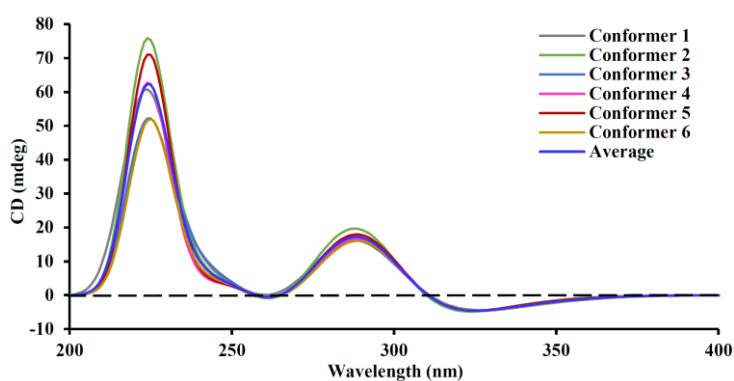

Computational data of (1*S*,6*R*,9'*R*)-4

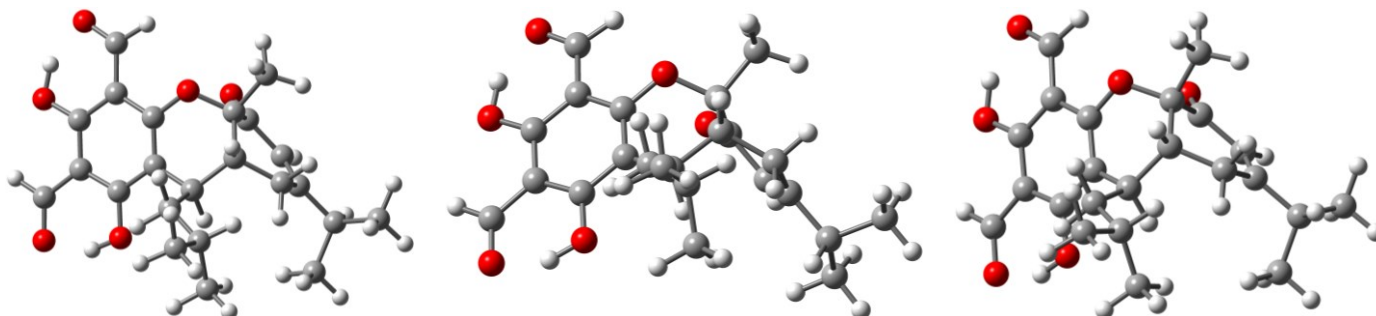

Conformer 1

Conformer 2

Conformer 3

| No.         | Distribution (%) | Relative Energy (kcal/mol) |
|-------------|------------------|----------------------------|
| Conformer 1 | 45.1622          | 0.0000                     |
| Conformer 2 | 20.0367          | 0.4815                     |
| Conformer 3 | 19.1046          | 0.5097                     |

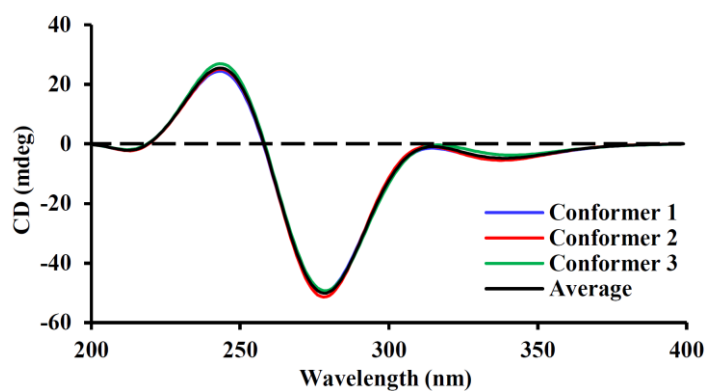

Computational data of (1*S*,6*S*)-5

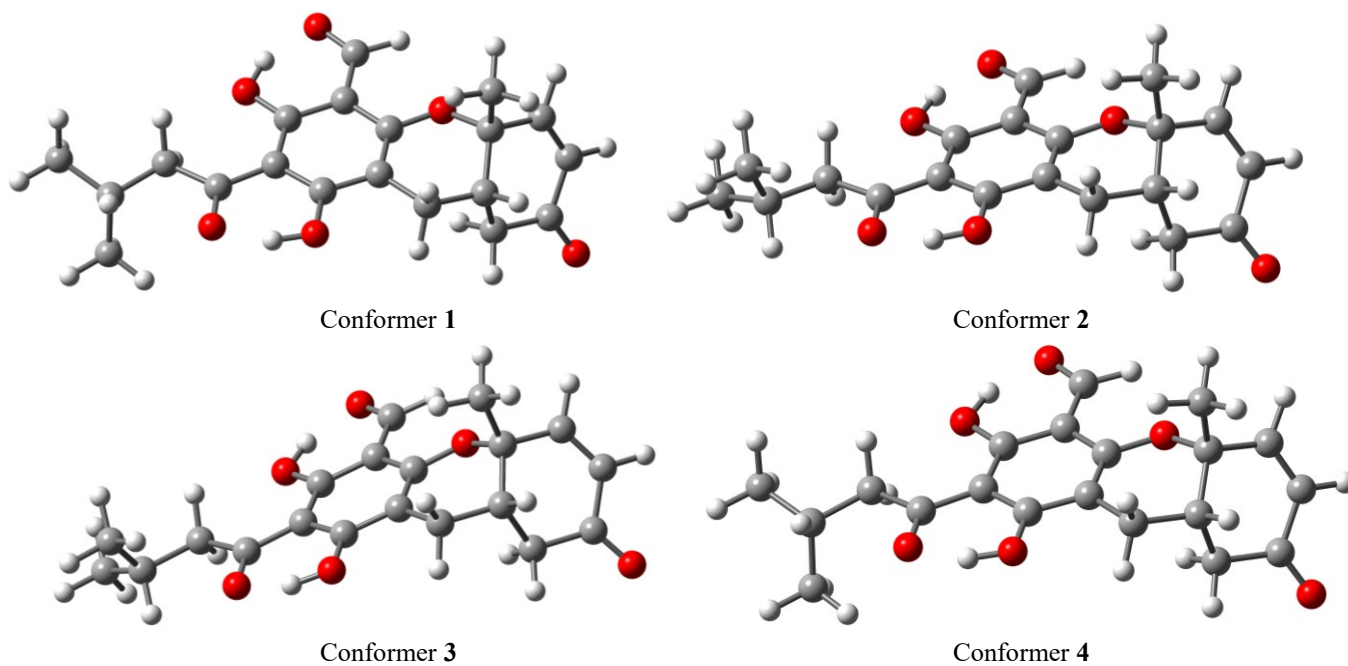

| No.         | Distribution (%) | Relative Energy (kcal/mol) | No.         | Distribution (%) | Relative Energy (kcal/mol) |
|-------------|------------------|----------------------------|-------------|------------------|----------------------------|
| Conformer 1 | 33.5606          | 0.0000                     | Conformer 3 | 9.6010           | 0.7415                     |
| Conformer 2 | 29.2783          | 0.0809                     | Conformer 4 | 8.7216           | 0.7984                     |

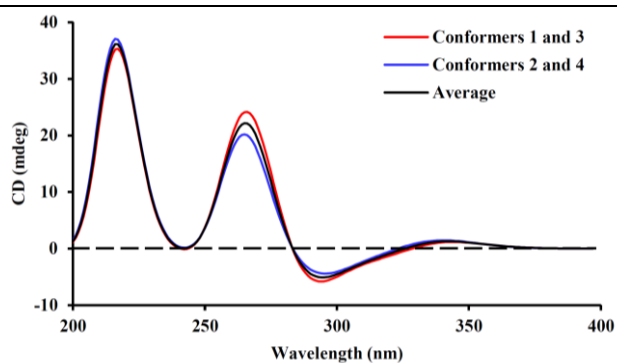

Computational data of (9'*R*)-6

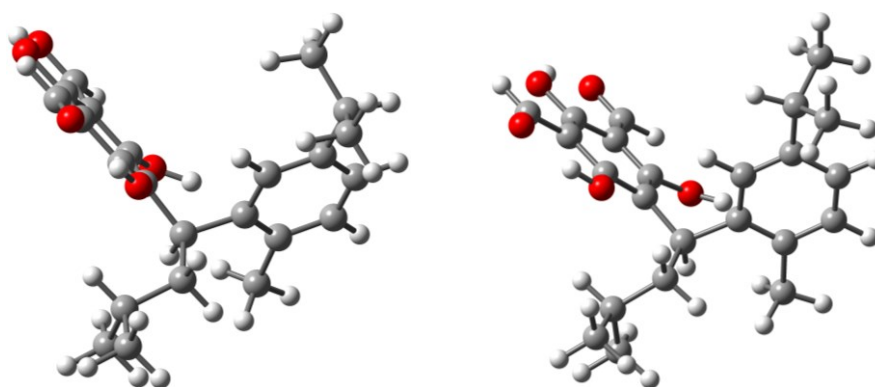

| No.         | Distribution (%) | Relative Energy (kcal/mol) |
|-------------|------------------|----------------------------|
| Conformer 1 | 55.2162          | 0.0000                     |
| Conformer 2 | 36.4902          | 0.2454                     |

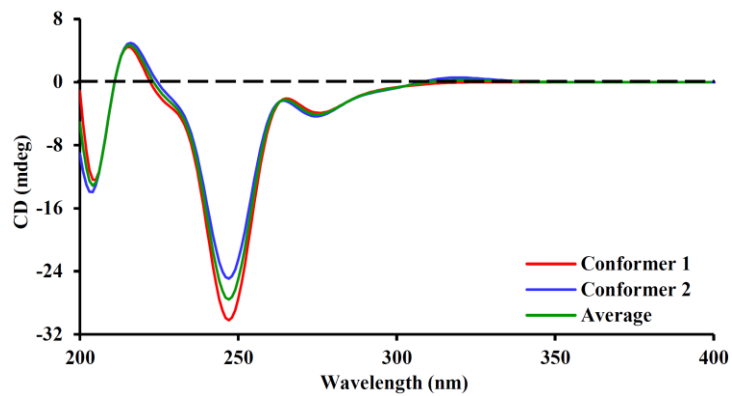

Computational data of (1''S)-8

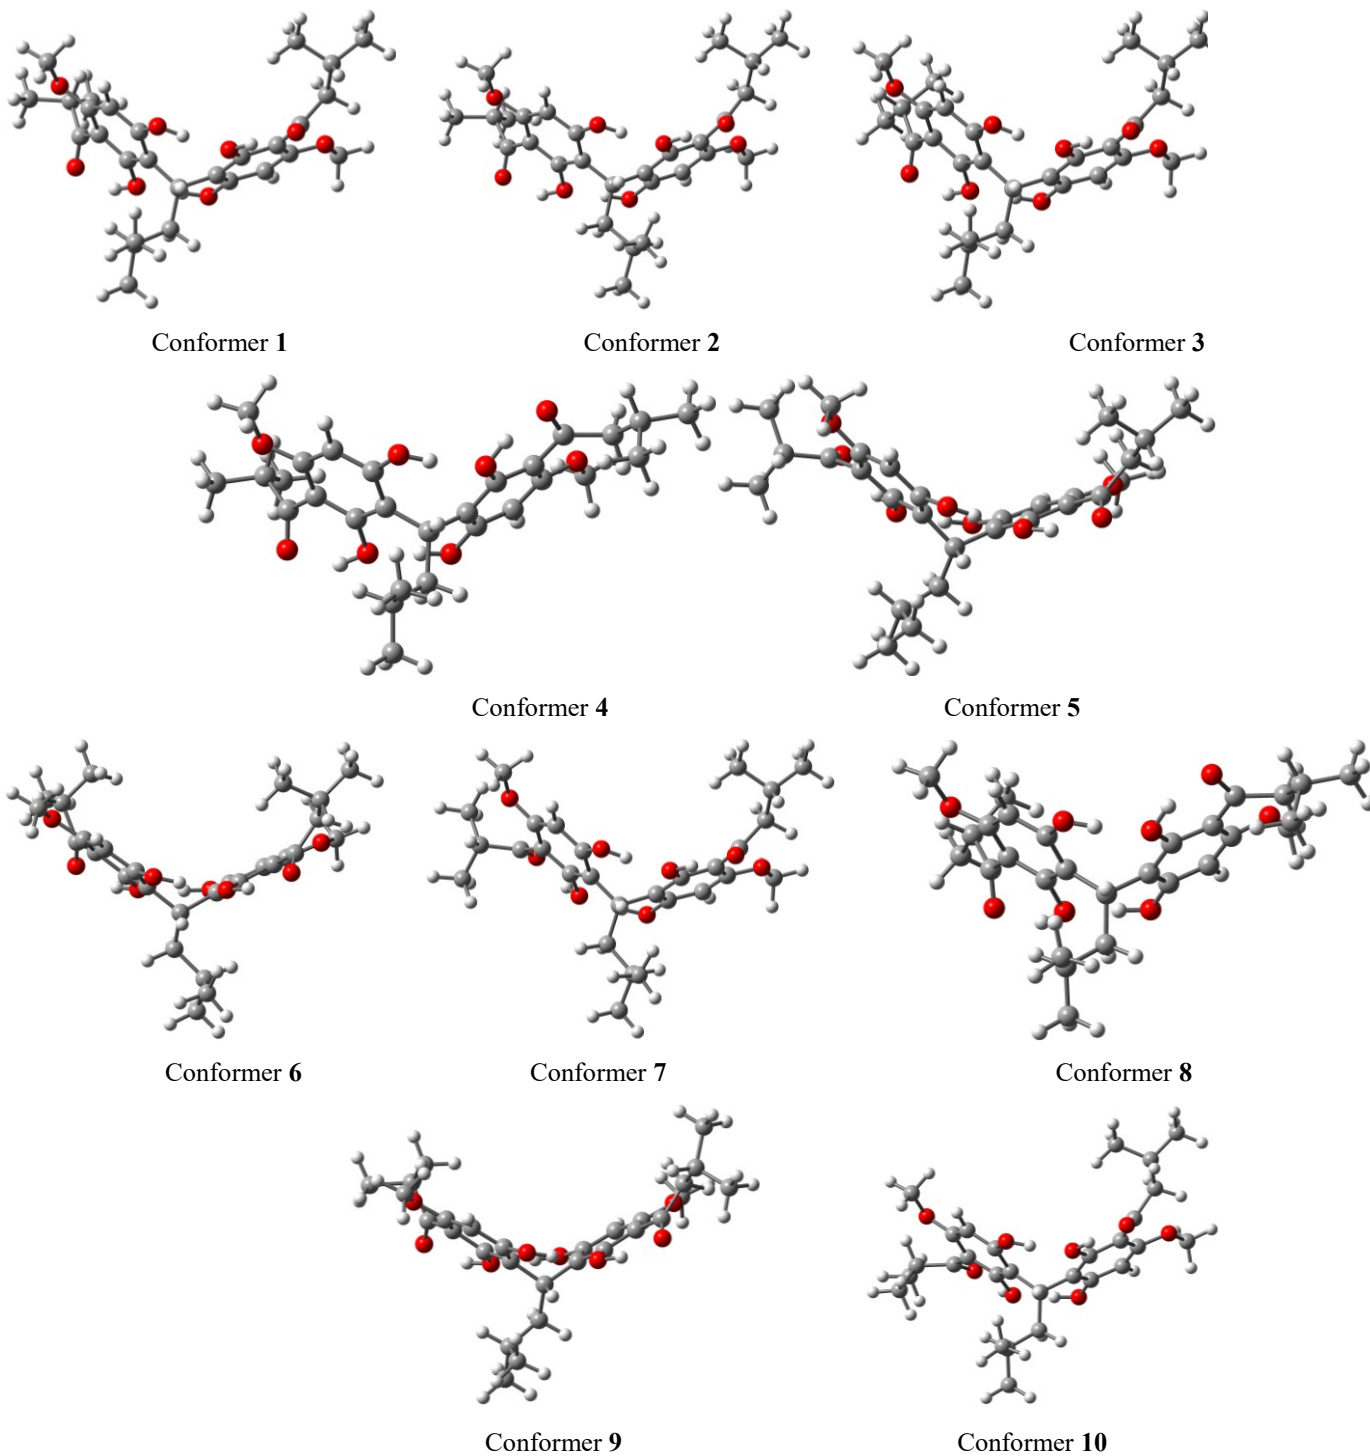

| No.         | Distribution (%) | Relative Energy (kcal/mol) | No.          | Distribution (%) | Relative Energy (kcal/mol) |
|-------------|------------------|----------------------------|--------------|------------------|----------------------------|
| Conformer 1 | 12.8695          | 0.0000                     | Conformer 6  | 5.1513           | 0.5425                     |
| Conformer 2 | 10.5966          | 0.1151                     | Conformer 7  | 4.7548           | 0.5899                     |
| Conformer 3 | 6.2867           | 0.4245                     | Conformer 8  | 3.0025           | 0.8623                     |
| Conformer 4 | 6.1767           | 0.4349                     | Conformer 9  | 2.8001           | 0.9037                     |
| Conformer 5 | 5.2207           | 0.5346                     | Conformer 10 | 2.6472           | 0.9369                     |

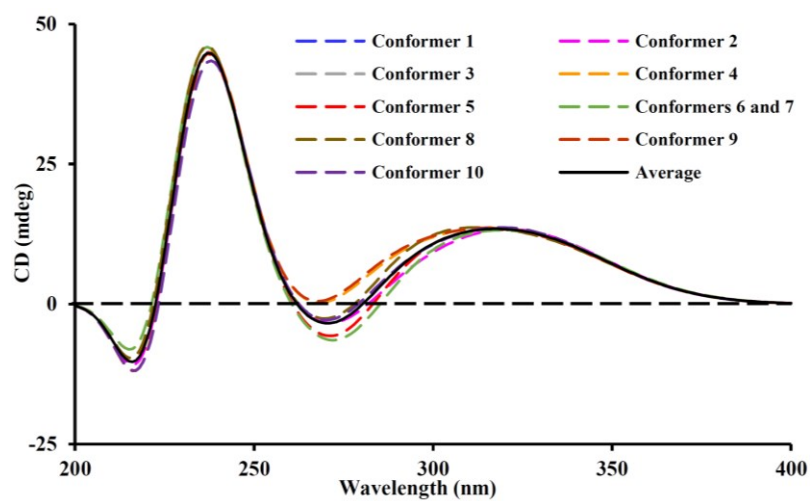

Supplement: NIHMS1639531-supplement-Liu_Supplementary_Info.pdf [file NIHMS1639531-supplement-Liu_Supplementary_Info.pdf]
